# Supplementary material for: A Multi-Omic View of Host-Pathogen-Commensal Interplay in Salmonella-Mediated Intestinal Infection
Source: PubMed Central journal article supplement (PMC3694140; doi:10.1371/journal.pone.0067155), 2013-06-26

### Expression of *fuc* genes *in vivo*

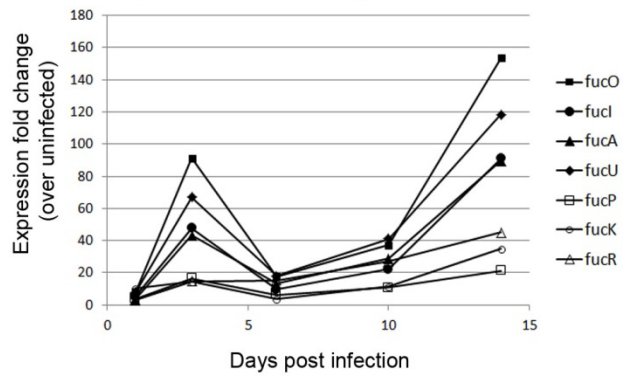

Supplement: pone.0067155.s005.pdf [file pone.0067155.s005.pdf]
