# Supplementary material for: A Multi-Omic View of Host-Pathogen-Commensal Interplay in Salmonella-Mediated Intestinal Infection
Source: PubMed Central journal article supplement (PMC3694140; doi:10.1371/journal.pone.0067155), 2013-06-26

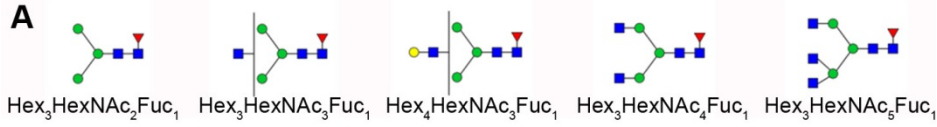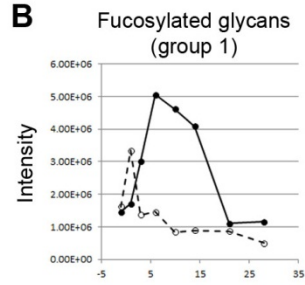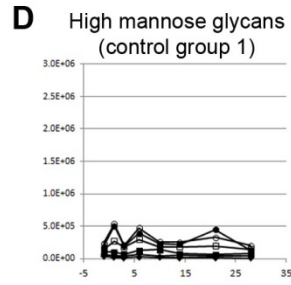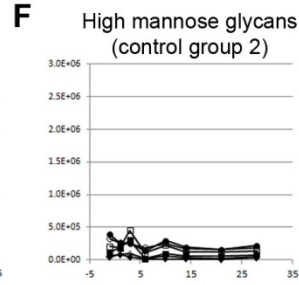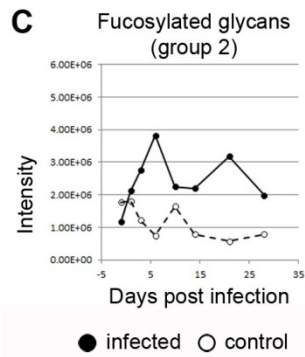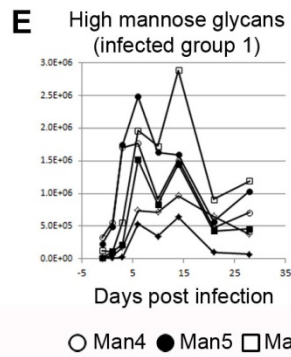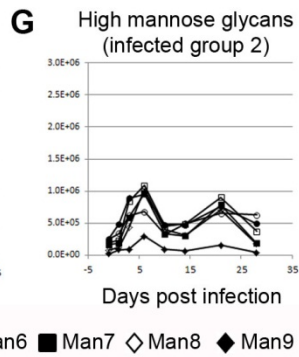

Supplement: pone.0067155.s006.pdf [file pone.0067155.s006.pdf]
