# Supplementary material for: A Multi-Omic View of Host-Pathogen-Commensal Interplay in Salmonella-Mediated Intestinal Infection
Source: PubMed Central journal article supplement (PMC3694140; doi:10.1371/journal.pone.0067155), 2013-06-26
Supplement: pone.0067155.s008.pdf [file pone.0067155.s008.pdf]

|              |                |                                                                                                                                                                          |  |  |  |  |  |   |    |    |    |     |     |     |    |     |    |    |    |    |    |    |    |   |    |    |  |
|--------------|----------------|--------------------------------------------------------------------------------------------------------------------------------------------------------------------------|--|--|--|--|--|---|----|----|----|-----|-----|-----|----|-----|----|----|----|----|----|----|----|---|----|----|--|
| gj 149255293 | XP_001480324.1 | PREDICTED: similar to Murinoglobulin 1                                                                                                                                   |  |  |  |  |  |   |    |    |    |     |     |     |    |     |    |    | 1  |    |    |    |    |   |    |    |  |
| gj 149255339 | XP_996033.2    | PREDICTED: similar to calmodulin                                                                                                                                         |  |  |  |  |  | 1 |    |    |    |     |     |     |    |     |    |    |    |    |    |    |    |   | 1  |    |  |
| gj 149255578 | XP_001476107.1 | PREDICTED: similar to immunoglobulin kappa chain                                                                                                                         |  |  |  |  |  |   | 2  | 1  | 1  | 4   | 3   |     | 1  |     |    |    | 2  | 2  | 1  | 2  | 1  | 3 | 1  |    |  |
| gj 149255583 | XP_989825.2    | PREDICTED: hypothetical protein                                                                                                                                          |  |  |  |  |  |   |    |    |    |     |     |     |    |     |    |    |    |    |    |    |    | 1 |    |    |  |
| gj 149255600 | XP_001476873.1 | PREDICTED: similar to light chain of the monoclonal antibody MST2                                                                                                        |  |  |  |  |  |   |    |    | 1  | 1   | 1   |     | 1  |     |    |    | 1  |    | 2  | 1  | 1  | 2 | 1  |    |  |
| gj 149255605 | XP_001477220.1 | PREDICTED: similar to [Human Ig rearranged gamma chain mRNA, V-J-C region and complete cds.]                                                                             |  |  |  |  |  |   | 1  | 5  | 1  | 2   | 1   | 1   | 1  | 1   |    |    |    |    | 2  | 1  | 1  | 1 | 2  |    |  |
| gj 149255611 | XP_001477384.1 | PREDICTED: similar to [Human Ig rearranged gamma chain mRNA, V-J-C region and complete cds.]                                                                             |  |  |  |  |  |   |    |    |    | 1   |     |     |    |     |    |    |    |    |    |    |    |   |    |    |  |
| gj 149255615 | XP_001477602.1 | PREDICTED: similar to immunoglobulin kappa-chain                                                                                                                         |  |  |  |  |  |   | 1  |    |    |     |     |     |    |     |    |    |    | 3  |    | 1  | 3  | 1 |    | 1  |  |
| gj 149255637 | XP_001476714.1 | PREDICTED: similar to Chain L, Structural Basis Of Antigen Mimicry In A Clinically Relevant Melanoma Antigen System isoform 1                                            |  |  |  |  |  |   | 1  | 3  |    | 2   | 2   |     |    | 5   | 3  |    |    | 11 | 4  | 7  | 10 | 6 | 6  | 12 |  |
| gj 149255823 | XP_001480334.1 | PREDICTED: similar to Cofilin-1 (Cofilin, non-muscle isoform)                                                                                                            |  |  |  |  |  |   |    |    |    |     |     |     |    |     |    |    |    |    |    |    |    |   |    |    |  |
| gj 149256882 | XP_001478116.1 | PREDICTED: similar to peptidoglycan recognition protein                                                                                                                  |  |  |  |  |  |   |    |    |    |     |     |     |    |     |    |    |    |    |    |    | 9  |   |    | 1  |  |
| gj 149256898 | XP_001471707.1 | PREDICTED: hypothetical protein                                                                                                                                          |  |  |  |  |  |   | 1  |    |    |     |     |     |    |     |    |    |    | 1  | 3  | 14 | 3  |   |    | 1  |  |
| gj 149257837 | XP_001471659.1 | PREDICTED: hypothetical protein                                                                                                                                          |  |  |  |  |  |   |    |    |    |     |     |     |    |     |    |    |    |    |    |    |    |   |    |    |  |
| gj 149258165 | XP_001472728.1 | PREDICTED: similar to beta-globin isoform 1                                                                                                                              |  |  |  |  |  |   |    |    |    |     |     |     |    |     |    |    |    |    |    | 2  |    |   |    |    |  |
| gj 149258188 | XP_001471843.1 | PREDICTED: hypothetical protein                                                                                                                                          |  |  |  |  |  |   |    |    |    | 2   |     |     |    |     |    |    |    |    |    |    |    |   |    |    |  |
| gj 149260099 | XP_001474833.1 | PREDICTED: similar to Annexin A2 (Annexin II) (Lipocortin II) (Calpactin I heavy chain) (Chromobindin-8) (p36) (Protein I) (Placental anticoagulant protein IV) (PAP-IV) |  |  |  |  |  |   |    |    | 2  |     |     |     |    |     |    |    |    |    |    | 1  |    |   |    | 1  |  |
| gj 149261589 | XP_486478.3    | PREDICTED: similar to ferritin light chain 2                                                                                                                             |  |  |  |  |  |   | 2  | 1  | 1  | 5   | 3   | 6   |    |     |    | 4  |    | 2  |    | 2  |    |   |    |    |  |
| gj 149263303 | XP_204772.4    | PREDICTED: similar to endothelial monocyte-activating polypeptide                                                                                                        |  |  |  |  |  |   |    |    |    |     |     |     |    |     |    |    |    |    |    |    |    |   |    |    |  |
| gj 149263766 | XP_001472141.1 | PREDICTED: hypothetical protein                                                                                                                                          |  |  |  |  |  |   | 38 | 40 | 50 | 109 | 195 | 189 | 12 | 101 | 17 | 76 | 40 | 37 | 47 | 10 | 37 |   | 32 |    |  |
| gj 149263798 | XP_001474075.1 | PREDICTED: similar to immunoglobulin epsilon                                                                                                                             |  |  |  |  |  |   | 2  | 15 | 3  | 6   | 10  | 9   | 1  | 9   | 4  | 19 | 5  | 22 | 7  | 6  | 2  |   | 9  |    |  |
| gj 149264032 | XP_001475950.1 | PREDICTED: similar to Hist1h2bj protein                                                                                                                                  |  |  |  |  |  |   |    | 1  | 1  |     |     |     |    |     |    |    |    |    |    | 1  |    |   |    |    |  |
| gj 149264124 | XP_920080.3    | PREDICTED: hypothetical protein                                                                                                                                          |  |  |  |  |  |   |    |    |    |     |     |     |    |     |    |    |    |    |    |    |    |   |    |    |  |
| gj 149264591 | XP_001477449.1 | PREDICTED: hypothetical protein                                                                                                                                          |  |  |  |  |  |   |    |    |    |     |     |     |    |     |    |    |    |    |    |    |    |   |    |    |  |
| gj 149265958 | XP_001474586.1 | PREDICTED: similar to purine nucleoside phosphorylase                                                                                                                    |  |  |  |  |  |   |    |    |    |     |     |     |    |     |    |    |    |    |    |    |    |   |    |    |  |
| gj 149267864 | XP_001479188.1 | PREDICTED: similar to apolipoprotein D                                                                                                                                   |  |  |  |  |  |   |    |    |    |     |     |     |    |     |    |    |    |    |    | 2  |    |   |    | 1  |  |
| gj 149269211 | XP_908790.3    | PREDICTED: similar to class Ib MHC antigen Qa-2 isoform 2                                                                                                                |  |  |  |  |  |   |    |    |    |     |     |     |    |     |    |    |    |    |    | 1  |    |   |    |    |  |
| gj 149269220 | XP_001473590.1 | PREDICTED: similar to MHC H2-K 24 polypeptide isoform 1                                                                                                                  |  |  |  |  |  |   |    |    |    |     |     |     |    |     |    |    |    |    |    | 3  | 2  | 1 |    |    |  |
| gj 149269696 | XP_001475963.1 | PREDICTED: hypothetical protein                                                                                                                                          |  |  |  |  |  |   |    |    | 1  | 1   |     | 1   |    |     |    |    |    |    | 1  | 1  |    |   |    |    |  |
| gj 149270372 | XP_001474350.1 | PREDICTED: hypothetical protein                                                                                                                                          |  |  |  |  |  |   |    |    |    |     |     |     |    |     |    |    |    |    |    |    |    |   |    | 1  |  |
| gj 149270446 | XP_001478257.1 | PREDICTED: similar to ribosomal protein S7                                                                                                                               |  |  |  |  |  |   |    |    |    |     |     |     |    |     |    |    |    |    |    |    |    |   |    |    |  |
| gj 149270512 | XP_001479065.1 | PREDICTED: hypothetical protein                                                                                                                                          |  |  |  |  |  |   |    | 1  |    |     |     |     |    |     |    |    |    | 1  |    |    |    |   |    |    |  |
| gj 149271597 | XP_001473196.1 | PREDICTED: similar to spermine synthase                                                                                                                                  |  |  |  |  |  |   |    |    |    |     |     |     |    |     |    |    |    |    |    |    |    |   |    |    |  |
| gj 149272386 | XP_001477701.1 | PREDICTED: similar to thymosin beta-4                                                                                                                                    |  |  |  |  |  |   |    |    |    |     |     |     |    |     |    |    |    |    |    |    |    |   |    |    |  |
| gj 149274531 | XP_001473875.1 | PREDICTED: similar to heterogeneous nuclear ribonucleoprotein A2/B1                                                                                                      |  |  |  |  |  |   |    |    |    |     |     |     |    |     |    |    |    |    |    |    |    |   |    |    |  |
| gj 149274769 | XP_001478965.1 | PREDICTED: similar to VH coding region                                                                                                                                   |  |  |  |  |  |   | 1  |    |    |     | 1   |     |    |     |    |    |    |    |    |    |    |   |    |    |  |
| gj 149275191 | XP_001473825.1 | PREDICTED: hypothetical protein                                                                                                                                          |  |  |  |  |  |   |    |    |    |     |     |     |    |     |    |    |    |    |    |    |    |   | 4  |    |  |
| gj 15022803  | NP_035583.1    | serine (or cysteine) proteinase inhibitor, clade B, member 9c isoform 2                                                                                                  |  |  |  |  |  |   | 2  | 3  |    |     |     |     |    |     |    |    |    | 1  | 3  | 13 | 2  |   | 3  | 5  |  |
| gj 153945724 | NP_033171.2    | neuroplastin precursor                                                                                                                                                   |  |  |  |  |  |   |    |    |    |     |     |     |    |     |    |    |    |    |    | 2  |    |   |    |    |  |
| gj 153945747 | NP_032672.2    | murinoglobulin-2 precursor                                                                                                                                               |  |  |  |  |  |   |    |    |    |     |     |     |    |     |    |    |    |    |    | 2  |    |   |    |    |  |
| gj 154090941 | NP_997648.2    | keratin, type I cytoskeletal 42                                                                                                                                          |  |  |  |  |  |   |    |    |    |     |     |     |    |     |    |    |    |    |    | 2  |    |   |    |    |  |
| gj 154240724 | NP_598766.2    | ectonucleotide pyrophosphatase/phosphodiesterase family member 3                                                                                                         |  |  |  |  |  |   | 6  | 9  | 1  | 2   | 4   | 3   |    | 4   | 4  | 16 | 4  | 38 | 21 | 9  | 9  |   | 14 |    |  |
| gj 157951678 | NP_033932.2    | carbonic anhydrase 6 precursor                                                                                                                                           |  |  |  |  |  |   | 1  | 2  |    | 2   |     | 2   |    | 1   |    |    | 4  |    |    |    |    |   | 1  |    |  |
| gj 15826844  | NP_035584.1    | serine (or cysteine) proteinase inhibitor, clade B, member 6b                                                                                                            |  |  |  |  |  |   |    |    |    |     |     |     |    |     |    |    |    |    | 10 | 16 | 2  |   | 2  | 4  |  |
| gj 160333613 | NP_958751.2    | serine (or cysteine) proteinase inhibitor, clade B, member 3C                                                                                                            |  |  |  |  |  |   |    | 3  |    |     |     |     |    |     |    |    |    | 6  |    | 1  |    |   |    |    |  |
| gj 160333652 | NP_081496.2    | protease, serine, 32                                                                                                                                                     |  |  |  |  |  |   |    | 1  |    |     |     |     |    |     |    |    | 2  | 1  | 1  | 1  | 1  |   |    | 1  |  |
| gj 160333869 | NP_035258.2    | pancreatic lipase-related protein 2                                                                                                                                      |  |  |  |  |  |   | 4  | 24 | 5  |     |     |     |    |     |    |    | 8  | 2  | 28 | 14 | 4  | 6 | 1  |    |  |
| gj 160358829 | NP_059067.2    | hemopexin precursor                                                                                                                                                      |  |  |  |  |  |   |    |    |    |     |     |     |    |     |    |    |    |    |    |    |    |   |    |    |  |
| gj 160707976 | NP_036125.4    | protein piccolo isoform 1                                                                                                                                                |  |  |  |  |  |   |    |    |    |     |     |     |    |     |    |    |    |    |    |    |    |   |    | 4  |  |
| gj 161016799 | NP_038499.2    | annexin A4                                                                                                                                                               |  |  |  |  |  |   | 3  | 6  | 3  | 1   |     |     |    | 2   | 2  | 5  | 5  | 33 | 13 | 9  | 1  |   | 11 |    |  |
| gj 161016822 | NP_001104301.1 | aspartyl aminopeptidase isoform a                                                                                                                                        |  |  |  |  |  |   | 2  | 1  |    | 6   | 2   | 2   | 1  | 1   | 2  | 4  | 3  | 16 | 4  | 2  | 4  |   | 5  |    |  |
| gj 161016833 | NP_031902.2    | dipeptidase 1 precursor                                                                                                                                                  |  |  |  |  |  |   | 4  | 22 | 3  | 1   | 3   | 6   |    | 5   | 2  | 26 | 9  | 7  | 4  | 3  | 6  |   | 8  |    |  |
| gj 162138915 | NP_034079.2    | carnitine O-palmitoyltransferase 2, mitochondrial precursor                                                                                                              |  |  |  |  |  |   |    |    |    |     |     |     |    |     |    |    |    |    |    |    |    |   | 2  |    |  |
| gj 163310765 | NP_033784.2    | serum albumin precursor                                                                                                                                                  |  |  |  |  |  |   |    | 2  |    |     |     |     |    |     |    |    |    |    | 1  |    | 25 | 1 | 1  |    |  |





|             |                |                                                           |     |     |     |     |     |     |     |     |     |     |     |     |     |    |     |    |    |   |   |   |
|-------------|----------------|-----------------------------------------------------------|-----|-----|-----|-----|-----|-----|-----|-----|-----|-----|-----|-----|-----|----|-----|----|----|---|---|---|
| gi 31982186 | NP_032643.2    | malate dehydrogenase, mitochondrial precursor             |     |     |     |     |     |     |     |     |     |     |     |     |     |    |     |    | 1  |   | 1 |   |
| gi 31982199 | NP_032611.2    | meprin A subunit alpha                                    | 3   |     | 3   | 3   | 5   | 4   |     | 2   | 1   | 4   | 3   | 5   |     | 1  | 2   | 3  | 4  |   |   |   |
| gi 33563236 | NP_031512.1    | rho GDP-dissociation inhibitor 2                          |     |     |     |     |     |     |     |     |     |     |     |     |     |    |     |    |    |   |   |   |
| gi 33563240 | NP_033736.1    | actin, alpha skeletal muscle                              |     |     |     |     |     |     |     |     |     |     | 1   |     |     |    |     |    | 1  |   |   |   |
| gi 33563252 | NP_034326.1    | fibrinogen, alpha polypeptide isoform 2                   |     |     |     |     |     |     |     |     |     |     |     | 6   | 2   | 2  | 1   |    |    |   |   |   |
| gi 33859474 | NP_031784.1    | complement receptor type 2                                |     |     |     |     |     |     |     |     |     |     |     |     |     |    |     |    | 2  |   |   |   |
| gi 33859640 | NP_035658.1    | transaldolase                                             |     |     |     |     |     |     |     |     |     |     |     |     |     |    |     |    |    |   |   |   |
| gi 33859686 | NP_079976.1    | phosphoglucomutase-2                                      |     |     |     |     |     |     |     |     |     |     |     |     |     |    |     |    |    |   |   |   |
| gi 33859809 | NP_862897.1    | fibrinogen beta chain precursor                           |     |     |     |     |     |     |     |     |     |     |     |     |     |    |     |    | 25 | 3 | 1 |   |
| gi 34328436 | NP_081138.2    | CD177 antigen precursor                                   |     |     |     |     |     |     |     |     |     |     |     |     |     |    |     |    | 11 | 3 | 6 |   |
| gi 34538600 | NP_904330.1    | cytochrome c oxidase subunit I                            |     |     |     |     |     |     |     |     |     |     |     |     |     |    |     |    | 3  |   |   |   |
| gi 34538601 | NP_904331.1    | cytochrome c oxidase subunit II                           |     |     |     |     |     |     |     |     |     |     |     |     |     |    |     |    | 3  |   |   |   |
| gi 34915988 | NP_033898.1    | basigin isoform 1                                         |     |     | 3   | 1   | 1   |     | 1   | 1   | 1   | 1   | 3   | 13  | 1   | 2  |     |    |    |   | 2 |   |
| gi 36031132 | NP_031530.2    | sarcoplasmic/endoplasmic reticulum calcium ATPase 1       | 1   | 1   | 4   |     |     |     |     |     |     |     | 5   | 6   |     |    |     |    |    |   | 4 | 2 |
| gi 37674236 | NP_081201.2    | pancreatic triacylglycerol lipase                         | 38  | 58  | 63  | 32  | 26  | 26  | 31  | 41  | 32  | 72  | 45  | 68  | 119 | 41 | 57  | 87 |    |   |   |   |
| gi 38076713 | XP_357312.1    | PREDICTED: similar to ferritin light chain 2              | 1   | 1   |     | 1   | 2   | 3   |     | 2   | 1   | 4   |     | 3   |     |    |     |    |    |   |   |   |
| gi 40556608 | NP_032328.2    | heat shock protein HSP 90-beta                            |     |     |     |     |     |     |     |     |     |     |     |     |     |    |     |    |    |   |   |   |
| gi 42415475 | NP_035162.1    | protein disulfide-isomerase precursor                     |     |     |     |     |     |     |     |     |     |     |     |     |     |    |     |    | 6  |   | 1 | 1 |
| gi 45504394 | NP_034708.1    | integrin beta-1 precursor                                 |     |     |     |     |     |     |     |     |     |     |     |     |     |    |     |    |    | 7 |   |   |
| gi 46559389 | NP_997507.1    | angiotensin-converting enzyme isoform 1                   |     |     |     |     |     |     |     |     |     |     |     |     |     |    |     |    |    | 3 |   |   |
| gi 50345978 | NP_001002012.1 | heat shock-related 70 kDa protein 2                       | 1   |     | 1   | 1   |     |     |     |     | 1   |     | 1   | 2   |     |    |     |    |    |   | 1 | 1 |
| gi 51010909 | NP_001003405.1 | trypsin 5                                                 | 13  | 10  | 13  | 11  | 11  | 14  | 8   | 13  | 9   | 15  | 12  | 17  | 10  | 9  | 13  | 10 |    |   |   |   |
| gi 51491845 | NP_001003908.1 | clathrin heavy chain 1                                    |     |     |     |     |     |     |     |     |     |     |     |     |     |    |     |    |    |   |   |   |
| gi 51765047 | XP_486246.1    | PREDICTED: similar to Tubulin, alpha 3c isoform 1         |     |     |     |     |     |     |     |     |     |     |     |     |     |    |     |    |    |   |   |   |
| gi 54312076 | NP_079626.2    | carboxypeptidase A1 precursor                             | 28  | 68  | 51  | 91  | 457 | 151 | 101 | 145 | 66  | 109 | 82  | 6   | 47  | 43 | 45  | 23 |    |   |   |   |
| gi 56090544 | NP_001007553.1 | intellectin-1b precursor                                  | 1   | 1   | 1   |     |     |     |     |     |     |     |     |     | 1   |    |     |    |    |   |   | 3 |
| gi 56550071 | NP_083982.1    | pancreatic carboxypeptidase B1                            | 13  | 37  | 28  | 35  | 79  | 41  | 9   | 22  | 9   | 88  | 51  | 54  | 23  | 17 | 27  | 19 |    |   |   |   |
| gi 5722282  | NP_001009546.1 | N-acetylated-alpha-linked acidic dipeptidase-like protein | 48  | 49  | 47  | 25  | 42  | 46  | 44  | 77  | 165 | 116 | 81  | 56  | 35  | 32 | 44  | 42 |    |   |   |   |
| gi 61097906 | NP_598917.1    | alpha-actinin-1                                           |     |     |     |     |     |     |     |     |     |     |     |     |     |    |     |    | 3  |   |   |   |
| gi 61743961 | NP_033773.1    | AHNAK nucleoprotein isoform 1                             |     |     |     |     |     |     |     |     |     |     |     |     |     |    |     |    |    |   |   |   |
| gi 6671509  | NP_031419.1    | actin, cytoplasmic 1                                      |     |     |     |     |     |     |     |     |     |     |     | 1   | 1   |    |     |    |    |   |   |   |
| gi 6671539  | NP_031464.1    | fructose-bisphosphate aldolase A isoform 2                |     |     |     |     |     |     |     |     |     |     |     |     |     |    |     |    |    |   |   |   |
| gi 6671664  | NP_031623.1    | calnexin precursor                                        |     |     |     |     |     |     |     |     |     |     |     |     |     |    |     |    | 2  |   |   |   |
| gi 6671672  | NP_031630.1    | F-actin-capping protein subunit alpha-2                   |     |     |     |     |     |     |     |     |     |     |     |     |     |    |     |    |    |   |   |   |
| gi 6671678  | NP_031633.1    | carbonic anhydrase 4 precursor                            |     |     |     |     |     |     |     |     |     |     |     |     |     |    |     |    | 4  |   |   |   |
| gi 6671746  | NP_031714.1    | cofilin-2                                                 |     |     |     |     |     |     |     |     |     |     |     |     |     |    |     |    |    |   |   |   |
| gi 6677703  | NP_033068.1    | lithostathine-1 precursor                                 |     |     |     |     |     |     |     |     |     |     |     |     | 6   | 8  | 2   |    |    |   |   |   |
| gi 6677705  | NP_033069.1    | lithostathine-2 precursor                                 |     |     |     |     |     |     |     |     |     |     |     |     | 14  | 14 | 3   | 1  |    |   |   |   |
| gi 6677837  | NP_033140.1    | protein S100-A9                                           |     |     |     |     |     |     |     |     |     |     |     |     |     |    |     |    |    |   |   |   |
| gi 6678079  | NP_033269.1    | alpha-1-antitrypsin 1-1 precursor                         |     |     |     | 4   |     |     |     |     |     | 1   |     | 33  | 11  | 5  | 4   | 3  |    |   |   |   |
| gi 6678085  | NP_033272.1    | alpha-1-antitrypsin 1-4 precursor                         |     |     |     | 10  |     |     |     |     |     |     |     |     |     |    |     | 3  |    |   |   |   |
| gi 6678097  | NP_033280.1    | serpin B6 isoform b                                       |     |     |     | 12  |     |     |     |     | 1   |     | 16  | 2   | 3   | 1  | 1   | 2  | 6  |   |   |   |
| gi 6678329  | NP_033399.1    | protein-glutamine gamma-glutamyltransferase 2             |     |     |     |     |     |     |     |     |     |     |     |     |     |    |     |    |    |   |   |   |
| gi 6678439  | NP_033456.1    | anionic trypsin-2 precursor                               | 195 | 103 | 274 | 299 | 703 | 545 | 384 | 309 | 145 | 338 | 318 | 139 | 154 | 90 | 171 | 67 |    |   |   |   |
| gi 6678581  | NP_033541.1    | wiskott-Aldrich syndrome protein homolog                  |     |     |     |     |     |     |     |     |     |     |     |     |     |    |     |    |    |   |   |   |
| gi 6679293  | NP_033428.1    | peptidoglycan recognition protein 1 precursor             |     |     |     |     |     |     |     |     |     |     |     | 1   | 5   | 3  |     |    |    |   |   |   |
| gi 6679383  | NP_032904.1    | alpha-2-antiplasmin precursor                             |     |     |     |     |     |     |     |     |     |     |     |     |     |    |     |    |    |   |   |   |
| gi 6679439  | NP_032933.1    | peptidyl-prolyl cis-trans isomerase A                     |     |     |     |     |     |     |     |     |     |     |     |     |     |    |     |    |    |   |   |   |
| gi 6679509  | NP_032979.1    | Psp                                                       |     |     |     |     |     |     |     |     |     |     |     |     |     |    |     |    |    |   |   | 1 |
| gi 6679653  | NP_031960.1    | glutamyl aminopeptidase                                   | 26  | 33  | 25  | 27  | 31  | 31  | 7   | 18  | 16  | 68  | 57  | 162 | 74  | 51 | 54  | 67 |    |   |   |   |
| gi 6679939  | NP_032111.1    | glyceraldehyde-3-phosphate dehydrogenase, testis-specific |     |     |     |     |     |     |     |     |     |     |     |     |     |    |     |    |    |   |   | 3 |
| gi 6679995  | NP_032142.1    | gamma-glutamyltranspeptidase 1                            | 1   | 1   |     | 1   |     |     |     |     | 1   | 1   | 3   | 6   | 6   | 4  | 3   | 5  |    |   |   |   |
| gi 6680231  | NP_032279.1    | high mobility group protein B3                            |     |     |     |     |     |     |     |     |     |     |     |     |     |    |     |    |    |   |   |   |
| gi 6680441  | NP_032401.1    | gastrotropin                                              |     |     |     |     |     |     |     |     |     |     | 1   |     |     |    |     |    |    |   |   |   |
| gi 6680586  | NP_032484.1    | serine protease inhibitor A3C precursor                   |     |     | 5   |     |     |     |     |     |     |     |     |     |     |    |     |    |    |   |   |   |
| gi 6680636  | NP_031424.1    | adenosine deaminase                                       |     |     |     |     |     |     |     |     |     |     |     |     | 3   | 1  |     |    |    |   |   |   |
| gi 6680710  | NP_031498.1    | aquaporin-1                                               |     |     | 1   |     |     |     |     |     |     | 1   |     | 1   |     |    |     |    |    |   |   |   |
| gi 6680836  | NP_031617.1    | calreticulin precursor                                    |     |     |     |     |     |     |     |     |     |     |     | 2   | 7   | 2  |     |    |    |   |   |   |



|             |                |                                                                            |  |    |    |   |    |   |    |    |   |   |    |    |    |    |    |    |    |   |
|-------------|----------------|----------------------------------------------------------------------------|--|----|----|---|----|---|----|----|---|---|----|----|----|----|----|----|----|---|
| gi 83029092 | XP_357633.3    | PREDICTED: similar to Ig kappa chain V-V region L7 precursor               |  |    |    |   |    | 1 |    | 1  |   | 2 |    | 2  |    | 1  |    | 1  |    | 3 |
| gi 83582782 | NP_081562.2    | angiotensin-converting enzyme 2 precursor                                  |  | 2  | 1  | 1 | 1  | 5 | 1  | 1  | 1 | 1 | 1  | 1  | 1  | 8  | 7  | 7  | 7  | 4 |
| gi 8392847  | NP_058556.1    | alpha-centractin                                                           |  |    |    |   |    |   |    |    |   |   |    |    |    |    |    |    |    |   |
| gi 84781771 | NP_001034085.1 | trypsin 10                                                                 |  | 3  | 3  | 3 | 3  | 3 | 2  | 1  | 2 | 2 | 4  | 6  | 6  | 3  | 3  | 4  | 4  |   |
| gi 84781781 | NP_001028485.1 | 28 kDa heat- and acid-stable phosphoprotein                                |  |    |    |   |    |   |    |    |   |   |    |    |    |    |    |    |    |   |
| gi 84872231 | NP_950181.2    | ectonucleotide pyrophosphatase/phosphodiesterase family member 4 precursor |  |    |    |   |    |   |    |    |   |   | 1  |    | 3  |    |    |    |    |   |
| gi 8567336  | NP_059502.1    | calcium-activated chloride channel regulator 1 precursor                   |  | 5  | 11 |   | 3  | 8 | 11 |    | 6 | 2 | 33 | 6  | 5  | 8  | 2  | 2  | 8  |   |
| gi 85701680 | NP_001028349.1 | keratin, type II cytoskeletal 2 oral                                       |  |    |    |   |    |   |    |    |   |   |    |    | 1  |    |    |    |    |   |
| gi 85701714 | NP_001028371.1 | calcium activated chloride channel                                         |  | 2  | 14 | 1 | 1  | 1 | 1  |    | 3 | 1 | 20 | 7  | 76 | 21 | 15 | 7  | 14 |   |
| gi 85719299 | NP_001034274.1 | carcinoembryonic antigen-related cell adhesion molecule 1 isoform 1        |  | 1  | 1  | 1 | 1  | 1 | 1  |    |   |   |    | 1  | 6  | 3  |    | 2  | 2  |   |
| gi 87239967 | NP_031795.2    | deleted in malignant brain tumors 1 protein                                |  | 7  | 3  | 2 | 10 | 9 | 10 | 1  | 9 | 5 | 10 | 14 | 43 | 41 | 28 | 7  | 10 |   |
| gi 8850219  | NP_059066.1    | haptoglobin precursor                                                      |  |    |    |   |    |   |    |    |   |   |    |    | 6  | 1  | 1  |    |    |   |
| gi 9055168  | NP_061300.1    | neutral ceramidase                                                         |  | 26 | 56 | 3 | 17 | 9 | 10 | 45 | 7 | 8 | 93 | 43 | 44 | 36 | 21 | 13 | 41 |   |
| gi 94363353 | XP_484859.3    | PREDICTED: similar to MYL6 protein                                         |  |    |    |   |    |   |    |    |   |   |    |    |    |    |    |    |    |   |
| gi 94366612 | XP_988506.1    | PREDICTED: hypothetical protein                                            |  |    |    |   |    |   |    |    |   |   |    |    |    | 1  |    |    |    |   |
| gi 94377669 | XP_993008.1    | PREDICTED: similar to kappa-tnp V-J                                        |  |    | 2  |   |    |   |    |    |   |   |    |    |    |    |    |    |    |   |
| gi 94377671 | XP_993123.1    | PREDICTED: similar to anti-A/U antibody                                    |  |    |    |   |    |   |    |    |   |   |    |    |    | 2  |    | 1  | 1  | 1 |
| gi 94378251 | XP_981474.1    | PREDICTED: similar to histone H4                                           |  |    | 9  |   |    |   |    |    |   |   |    |    |    | 2  | 2  | 1  | 1  | 1 |
| gi 94397546 | XP_982057.1    | PREDICTED: similar to ZFH-5                                                |  |    |    |   |    |   |    |    |   |   |    |    |    |    |    |    |    |   |
| gi 94400086 | XP_984563.1    | PREDICTED: similar to Ribosomal protein S27a                               |  |    |    |   |    |   |    |    |   |   |    |    |    | 3  |    |    |    |   |
| gi 94400195 | XP_001003388.1 | PREDICTED: similar to MSP23 isoform 2                                      |  |    |    |   |    |   |    |    |   |   |    |    |    |    |    |    |    |   |
| gi 94407590 | XP_898907.2    | PREDICTED: similar to odorant binding protein 1b                           |  | 4  | 22 | 4 | 1  | 2 | 1  | 6  | 5 | 5 | 91 | 19 | 9  | 8  | 4  |    |    | 3 |
| gi 9790069  | NP_062667.1    | spliceosome RNA helicase Bat1                                              |  |    |    |   |    |   |    |    |   |   |    |    |    |    |    |    |    |   |
| gi 9790073  | NP_062727.1    | cadherin-17 precursor                                                      |  | 1  | 1  | 2 | 2  | 2 | 1  |    |   | 2 | 2  | 11 | 22 | 3  | 2  | 4  | 2  |   |
| gi 9790141  | NP_062798.1    | actin-related protein 2/3 complex subunit 3                                |  |    |    |   |    |   |    |    |   |   |    |    |    |    |    |    |    |   |
| gi 9910294  | NP_064340.1    | keratin, type II cytoskeletal 71                                           |  |    | 2  | 1 | 1  |   |    |    | 1 | 1 | 2  |    | 2  |    | 1  |    |    |   |



|                        |      |                                                            |  |   |   |   |   |   |   |   |   |   |   |   |   |  |   |  |  |
|------------------------|------|------------------------------------------------------------|--|---|---|---|---|---|---|---|---|---|---|---|---|--|---|--|--|
| JCVIGM_123049_20110307 |      | ABC transporter periplasmic-binding protein ytfQ           |  |   |   |   |   |   |   |   |   |   |   |   |   |  |   |  |  |
| JCVIGM_295655_20110307 |      | ABC transporter related                                    |  |   |   |   |   |   |   |   |   | 1 |   |   |   |  |   |  |  |
| JCVIGM_097008_20110307 |      | ABC transporter, ATP-binding protein                       |  |   |   |   |   |   |   |   | 1 |   |   |   |   |  |   |  |  |
| JCVIGM_168201_20110307 |      | ABC transporter, ATP-binding protein                       |  |   |   |   |   |   |   |   |   |   |   |   |   |  |   |  |  |
| JCVIGM_070783_20110307 |      | ABC transporter, permease protein                          |  |   |   |   |   |   |   |   |   |   |   |   |   |  |   |  |  |
| JCVIGM_179750_20110307 |      | ABC transporter, substrate-binding protein                 |  |   |   |   |   |   |   |   |   |   |   |   |   |  |   |  |  |
| JCVIGM_284177_20110307 |      | ABC transporter, substrate-binding protein, family 1       |  |   |   |   | 1 |   |   |   |   |   | 1 |   |   |  |   |  |  |
| JCVIGM_284885_20110307 |      | ABC-type dipeptide transport system, periplasmic component |  |   |   |   |   |   |   |   |   |   |   |   |   |  |   |  |  |
| JCVIGM_168588_20110307 |      | ABC-type sugar transport system, periplasmic component     |  |   |   |   |   |   |   |   |   |   | 1 |   |   |  |   |  |  |
| JCVIGM_297706_20110307 |      | ABC-type sugar transport system, periplasmic component     |  |   |   | 1 | 2 |   | 4 |   |   |   |   |   |   |  |   |  |  |
| JCVIGM_162628_20110307 |      | ABC-type transport system, substrate-binding component     |  |   |   |   |   |   |   |   |   |   |   |   |   |  |   |  |  |
| JCVIGM_197130_20110307 |      | ABC-type xylose transport system, periplasmic component    |  |   |   | 1 | 1 |   |   |   |   | 1 | 1 |   |   |  |   |  |  |
| JCVIGM_034585_20110307 | ackA | acetate kinase                                             |  |   |   |   |   |   |   |   |   |   |   |   |   |  |   |  |  |
| JCVIGM_090369_20110307 | ackA | acetate kinase                                             |  |   |   |   | 1 | 1 |   |   |   |   |   |   |   |  |   |  |  |
| JCVIGM_103872_20110307 | ackA | acetate kinase                                             |  |   |   |   |   |   |   |   |   |   |   |   |   |  |   |  |  |
| JCVIGM_105479_20110307 | ackA | acetate kinase                                             |  |   |   |   |   |   |   |   |   |   |   |   |   |  |   |  |  |
| JCVIGM_313779_20110307 | ackA | acetate kinase                                             |  |   |   |   |   |   |   |   |   |   |   |   |   |  |   |  |  |
| JCVIGM_120726_20110307 | ilvC | acetohydroxy acid isomeroreductase, catalytic domain       |  |   |   |   |   |   |   |   |   |   |   |   |   |  |   |  |  |
| JCVIGM_136868_20110307 | ilvC | acetohydroxy acid isomeroreductase, catalytic domain       |  | 2 | 5 | 2 | 4 | 2 | 1 | 3 | 6 | 4 | 6 | 2 |   |  | 3 |  |  |
| JCVIGM_141542_20110307 | ilvC | acetohydroxy acid isomeroreductase, catalytic domain       |  |   | 1 | 2 | 3 | 2 |   | 2 | 3 | 5 | 1 | 2 | 1 |  |   |  |  |
| JCVIGM_256491_20110307 | ilvC | acetohydroxy acid isomeroreductase, catalytic domain       |  |   |   |   |   |   |   |   |   |   |   |   |   |  |   |  |  |
| JCVIGM_298658_20110307 | ilvC | acetohydroxy acid isomeroreductase, catalytic domain       |  |   |   |   |   |   |   |   |   |   |   |   |   |  |   |  |  |
| JCVIGM_383122_20110307 | ilvC | acetohydroxy acid isomeroreductase, catalytic domain       |  |   |   | 1 |   |   |   |   |   |   |   |   |   |  |   |  |  |
| JCVIGM_029818_20110307 | ilvN | acetolactate synthase, small subunit                       |  |   |   |   |   |   |   |   |   |   |   |   |   |  |   |  |  |
| JCVIGM_125179_20110307 |      | acetyl-coA acetyltransferases                              |  |   |   |   |   |   |   |   |   |   |   |   |   |  |   |  |  |
| JCVIGM_101296_20110307 |      | acetyl-coA C-acetyltransferase                             |  |   |   |   |   |   |   |   | 1 |   |   |   |   |  |   |  |  |
| JCVIGM_182295_20110307 |      | acetyl-coA C-acetyltransferase                             |  |   |   | 3 | 2 | 3 |   | 1 | 4 | 1 | 2 | 1 |   |  |   |  |  |
| JCVIGM_234799_20110307 |      | acetyl-coA C-acetyltransferase                             |  |   |   |   |   |   |   |   |   |   |   |   |   |  |   |  |  |
| JCVIGM_306189_20110307 | phaA | acetyl-CoA C-acetyltransferase                             |  |   |   |   |   |   |   |   |   |   |   |   |   |  |   |  |  |
| JCVIGM_299975_20110307 |      | acyltransferase family                                     |  |   |   |   |   |   |   |   |   |   |   |   |   |  |   |  |  |
| JCVIGM_058622_20110307 | purA | adenylosuccinate synthase                                  |  |   |   | 1 |   | 2 | 1 |   |   | 1 |   |   |   |  |   |  |  |





|                        |         |                                                                     |  |  |  |   |   |   |   |   |   |   |   |   |   |  |  |  |  |  |
|------------------------|---------|---------------------------------------------------------------------|--|--|--|---|---|---|---|---|---|---|---|---|---|--|--|--|--|--|
| JCVIGM_076159_20110307 | asd     | aspartate-semialdehyde dehydrogenase                                |  |  |  | 1 |   |   |   |   |   |   |   |   |   |  |  |  |  |  |
| JCVIGM_163401_20110307 | asd     | aspartate-semialdehyde dehydrogenase                                |  |  |  |   |   |   |   |   |   |   |   |   |   |  |  |  |  |  |
| JCVIGM_146114_20110307 | aspS    | aspartate--tRNA ligase                                              |  |  |  |   |   |   |   |   |   |   |   |   |   |  |  |  |  |  |
| JCVIGM_225435_20110307 | atpA    | ATP synthase F1, alpha subunit                                      |  |  |  |   |   |   |   |   |   |   |   |   |   |  |  |  |  |  |
| JCVIGM_193732_20110307 |         | ATP synthase subunit a                                              |  |  |  |   |   |   |   |   |   |   |   |   |   |  |  |  |  |  |
| JCVIGM_181280_20110307 |         | B12 binding domain                                                  |  |  |  | 1 | 3 | 2 | 1 |   |   |   |   |   |   |  |  |  |  |  |
| JCVIGM_335931_20110307 |         | basic membrane lipoprotein                                          |  |  |  |   |   |   |   |   |   |   |   |   |   |  |  |  |  |  |
| JCVIGM_191196_20110307 |         | beta-galactosidase                                                  |  |  |  |   |   |   |   |   |   |   |   |   |   |  |  |  |  |  |
| JCVIGM_065702_20110307 | bglA    | beta-glucosidase A                                                  |  |  |  |   |   |   |   |   |   |   |   |   |   |  |  |  |  |  |
| JCVIGM_026370_20110307 |         | beta-glucosidase-n-terminal domain-containing protein               |  |  |  |   |   |   |   |   |   |   |   |   |   |  |  |  |  |  |
| JCVIGM_156507_20110307 |         | beta-lactamase                                                      |  |  |  |   |   |   |   |   |   |   |   |   |   |  |  |  |  |  |
| JCVIGM_042339_20110307 | purH    | bifunctional purine biosynthesis protein purH                       |  |  |  |   |   |   |   |   |   |   | 1 |   |   |  |  |  |  |  |
| JCVIGM_036791_20110307 | buk     | butyrate kinase                                                     |  |  |  |   |   |   |   |   |   |   |   |   | 1 |  |  |  |  |  |
| JCVIGM_216035_20110307 |         | butyryl-coA dehydrogenase                                           |  |  |  |   |   |   |   |   |   |   |   |   |   |  |  |  |  |  |
| JCVIGM_265820_20110307 |         | butyryl-coA dehydrogenase                                           |  |  |  |   | 1 | 1 |   |   |   |   | 1 | 1 | 1 |  |  |  |  |  |
| JCVIGM_290061_20110307 |         | butyryl-coA dehydrogenase                                           |  |  |  |   |   |   |   |   |   |   |   |   |   |  |  |  |  |  |
| JCVIGM_329946_20110307 | bcd2    | butyryl-coA dehydrogenase                                           |  |  |  |   |   |   |   |   |   |   |   |   |   |  |  |  |  |  |
| JCVIGM_040543_20110307 | c7d2-bg | C7D2-BG protein                                                     |  |  |  |   |   |   |   |   |   |   |   |   |   |  |  |  |  |  |
| JCVIGM_017812_20110307 |         | carbohydrate ABC transporter substrate-binding protein, CUT1 family |  |  |  |   | 1 |   |   |   |   |   |   |   |   |  |  |  |  |  |
| JCVIGM_055645_20110307 |         | carbohydrate ABC transporter substrate-binding protein, CUT1 family |  |  |  |   | 2 | 1 | 1 | 1 | 2 |   |   | 1 |   |  |  |  |  |  |
| JCVIGM_306701_20110307 |         | carbohydrate ABC transporter substrate-binding protein, CUT1 family |  |  |  | 1 |   |   | 2 |   |   |   |   | 1 |   |  |  |  |  |  |
| JCVIGM_074670_20110307 |         | carbohydrate ABC transporter substrate-binding protein, CUT1 family |  |  |  | 5 | 1 | 2 | 3 |   |   |   |   | 3 |   |  |  |  |  |  |
| JCVIGM_324855_20110307 |         | carbohydrate ABC transporter, carbohydrate-binding protein          |  |  |  | 1 |   | 1 |   |   |   |   |   |   | 2 |  |  |  |  |  |
| JCVIGM_049249_20110307 | cooS    | carbon-monoxide dehydrogenase, catalytic subunit                    |  |  |  | 1 | 1 |   |   |   | 1 | 1 |   | 1 |   |  |  |  |  |  |
| JCVIGM_000407_20110307 | dnaK    | chaperone protein dnaK                                              |  |  |  |   |   |   |   |   |   | 1 |   |   |   |  |  |  |  |  |
| JCVIGM_021700_20110307 | dnaK    | chaperone protein dnaK                                              |  |  |  |   |   |   |   |   |   | 1 |   |   |   |  |  |  |  |  |
| JCVIGM_031425_20110307 | dnaK    | chaperone protein dnaK                                              |  |  |  |   |   |   |   |   |   | 2 |   | 1 |   |  |  |  |  |  |
| JCVIGM_032528_20110307 | dnaK    | chaperone protein dnaK                                              |  |  |  |   |   | 1 |   |   |   |   |   |   |   |  |  |  |  |  |
| JCVIGM_034511_20110307 | dnaK    | chaperone protein dnaK                                              |  |  |  |   |   |   |   |   |   |   |   |   |   |  |  |  |  |  |
| JCVIGM_043298_20110307 | dnaK    | chaperone protein dnaK                                              |  |  |  |   |   |   |   |   |   |   | 1 |   |   |  |  |  |  |  |

|                        |      |                                                                           |  |   |  |   |   |   |   |   |   |   |   |   |   |  |  |  |  |  |
|------------------------|------|---------------------------------------------------------------------------|--|---|--|---|---|---|---|---|---|---|---|---|---|--|--|--|--|--|
| JCVIGM_062282_20110307 | dnaK | chaperone protein dnaK                                                    |  |   |  |   | 1 |   | 1 |   |   |   |   |   |   |  |  |  |  |  |
| JCVIGM_122947_20110307 | dnaK | chaperone protein dnaK                                                    |  | 1 |  |   | 1 |   |   | 1 |   |   |   |   |   |  |  |  |  |  |
| JCVIGM_147511_20110307 | dnaK | chaperone protein dnaK                                                    |  |   |  |   |   |   | 1 |   |   |   | 1 | 1 | 1 |  |  |  |  |  |
| JCVIGM_213960_20110307 | dnaK | chaperone protein dnaK                                                    |  |   |  |   | 1 |   |   |   |   |   |   |   |   |  |  |  |  |  |
| JCVIGM_236768_20110307 | dnaK | chaperone protein dnaK                                                    |  |   |  |   |   |   | 2 |   |   |   |   |   |   |  |  |  |  |  |
| JCVIGM_086927_20110307 | groS | chaperonin 10 Kd subunit                                                  |  | 1 |  |   | 2 |   |   | 1 |   | 3 |   |   |   |  |  |  |  |  |
| JCVIGM_187049_20110307 | groS | chaperonin 10 Kd subunit                                                  |  | 6 |  | 2 | 4 | 4 | 8 | 2 |   |   | 2 |   |   |  |  |  |  |  |
| JCVIGM_213821_20110307 | groS | chaperonin 10 Kd subunit                                                  |  |   |  |   |   |   |   |   |   |   |   |   |   |  |  |  |  |  |
| JCVIGM_401604_20110307 | groS | chaperonin 10 Kd subunit                                                  |  | 1 |  |   |   | 1 |   |   |   |   |   |   |   |  |  |  |  |  |
| JCVIGM_413734_20110307 |      | CO dehydrogenase/acetyl-coA synthase complex, beta subunit                |  |   |  |   |   |   |   |   |   |   |   |   |   |  |  |  |  |  |
| JCVIGM_049251_20110307 | cdhC | CO dehydrogenase/CO-methylating acetyl-coA synthase complex, beta subunit |  |   |  |   | 2 |   |   | 1 |   |   |   |   |   |  |  |  |  |  |
| JCVIGM_339054_20110307 |      | coenzyme B12-dependent glycerol dehydratase, large subunit                |  |   |  |   |   |   |   |   |   |   |   |   |   |  |  |  |  |  |
| JCVIGM_212787_20110307 |      | cof-like hydrolase                                                        |  |   |  |   |   |   |   |   |   |   |   |   |   |  |  |  |  |  |
| JCVIGM_127608_20110307 |      | ComEC/Rec2-like protein                                                   |  |   |  |   |   |   |   |   |   |   |   |   |   |  |  |  |  |  |
| JCVIGM_286641_20110307 |      | conserved hypothetical protein                                            |  |   |  | 1 |   |   |   | 1 |   |   |   | 1 |   |  |  |  |  |  |
| JCVIGM_049253_20110307 |      | corrinoid/iron-sulfur protein, large subunit                              |  |   |  |   |   |   |   |   |   |   |   |   |   |  |  |  |  |  |
| JCVIGM_049252_20110307 |      | corrinoid/iron-sulfur protein, small subunit                              |  |   |  |   |   |   |   |   |   |   |   |   |   |  |  |  |  |  |
| JCVIGM_022873_20110307 | cysK | cysteine synthase A                                                       |  |   |  |   | 2 |   | 1 |   | 1 |   |   |   |   |  |  |  |  |  |
| JCVIGM_307840_20110307 |      | dehydrogenase, FMN-dependent                                              |  |   |  |   |   |   |   |   |   |   |   | 2 |   |  |  |  |  |  |
| JCVIGM_102159_20110307 | deoC | deoxyribose-phosphate aldolase                                            |  | 1 |  |   | 2 |   | 1 | 1 |   |   | 1 |   |   |  |  |  |  |  |
| JCVIGM_056340_20110307 |      | diaminopimelate dehydrogenase                                             |  |   |  |   |   |   |   |   |   |   |   |   |   |  |  |  |  |  |
| JCVIGM_104884_20110307 |      | diaminopimelate dehydrogenase                                             |  |   |  |   |   |   |   |   |   |   |   |   |   |  |  |  |  |  |
| JCVIGM_002401_20110307 | lpdA | dihydrolipoyl dehydrogenase                                               |  |   |  |   |   |   |   |   |   |   |   |   |   |  |  |  |  |  |
| JCVIGM_139913_20110307 | pyrD | dihydroorotate oxidase                                                    |  |   |  |   |   |   |   |   |   |   |   |   |   |  |  |  |  |  |
| JCVIGM_049254_20110307 |      | dihydropteroate synthase, DHPS                                            |  |   |  |   |   |   |   |   |   |   |   |   |   |  |  |  |  |  |
| JCVIGM_130560_20110307 | ilvD | dihydroxy-acid dehydratase                                                |  |   |  |   |   |   |   |   |   |   |   |   |   |  |  |  |  |  |
| JCVIGM_377265_20110307 | disA | DNA integrity scanning protein disA                                       |  |   |  |   |   | 1 |   |   |   |   |   |   |   |  |  |  |  |  |
| JCVIGM_176486_20110307 | dnaN | DNA polymerase III, beta subunit                                          |  |   |  |   |   |   |   |   |   |   |   | 1 |   |  |  |  |  |  |
| JCVIGM_228057_20110307 | etfB | electron transfer flavoprotein, alpha subunit                             |  |   |  |   | 1 |   |   |   |   |   |   |   |   |  |  |  |  |  |
| JCVIGM_310193_20110307 | etfB | electron transfer flavoprotein, alpha subunit                             |  |   |  |   | 1 | 1 |   |   | 1 |   |   | 1 |   |  |  |  |  |  |









|                        |      |                                                             |  |   |   |   |    |   |   |   |   |   |   |   |   |   |   |  |   |
|------------------------|------|-------------------------------------------------------------|--|---|---|---|----|---|---|---|---|---|---|---|---|---|---|--|---|
| JCVIGM_081547_20110307 |      | glutamate dehydrogenase, NADP-specific                      |  | 6 | 2 | 4 | 10 | 8 | 7 | 8 |   | 5 | 4 |   |   |   |   |  |   |
| JCVIGM_083070_20110307 |      | glutamate dehydrogenase, NADP-specific                      |  |   |   |   |    |   |   |   |   |   | 2 |   |   |   |   |  |   |
| JCVIGM_112581_20110307 |      | glutamate dehydrogenase, NADP-specific                      |  |   |   |   |    | 1 |   |   |   | 1 | 1 |   |   |   |   |  |   |
| JCVIGM_235230_20110307 |      | glutamate dehydrogenase, NADP-specific                      |  | 1 | 3 | 4 |    | 1 |   | 4 | 2 | 2 | 3 | 7 |   |   |   |  |   |
| JCVIGM_395419_20110307 |      | glutamate dehydrogenase, NADP-specific                      |  |   |   |   |    |   |   |   |   |   |   |   |   |   |   |  |   |
| JCVIGM_000822_20110307 | gdhB | glutamate dehydrogenase, NAD-specific                       |  |   |   |   |    |   |   |   |   |   |   |   |   |   | 1 |  |   |
| JCVIGM_031962_20110307 | gdhB | glutamate dehydrogenase, NAD-specific                       |  |   |   |   |    |   |   |   |   |   |   |   |   |   |   |  |   |
| JCVIGM_033111_20110307 | gdhB | glutamate dehydrogenase, NAD-specific                       |  |   |   |   |    |   |   |   |   |   |   |   |   |   |   |  |   |
| JCVIGM_044177_20110307 | gdhB | glutamate dehydrogenase, NAD-specific                       |  |   |   |   |    |   |   |   |   |   |   |   |   |   |   |  |   |
| JCVIGM_072261_20110307 | gdh  | glutamate dehydrogenase, NAD-specific                       |  |   |   |   |    | 3 |   |   |   |   |   |   |   |   |   |  |   |
| JCVIGM_124713_20110307 | gdhB | glutamate dehydrogenase, NAD-specific                       |  |   |   |   |    |   |   |   |   |   |   |   |   |   |   |  |   |
| JCVIGM_030438_20110307 |      | glutamate dehydrogenase/leucine dehydrogenase               |  |   | 2 | 1 | 1  | 1 |   |   | 2 |   | 2 |   |   |   |   |  |   |
| JCVIGM_067262_20110307 |      | glutamate dehydrogenase/leucine dehydrogenase               |  | 1 |   |   |    |   |   |   |   |   |   |   |   |   |   |  |   |
| JCVIGM_071296_20110307 |      | glutamate dehydrogenase/leucine dehydrogenase               |  |   |   |   |    |   |   |   |   |   |   |   |   |   |   |  |   |
| JCVIGM_130579_20110307 |      | glutamate dehydrogenase/leucine dehydrogenase               |  |   |   |   |    |   |   |   |   |   |   |   |   |   |   |  |   |
| JCVIGM_141521_20110307 |      | glutamate dehydrogenase/leucine dehydrogenase               |  | 2 | 2 | 2 | 2  | 1 | 2 | 2 | 3 | 1 | 2 | 2 |   |   |   |  |   |
| JCVIGM_226798_20110307 |      | glutamate dehydrogenase/leucine dehydrogenase               |  |   |   |   |    |   |   |   |   |   |   |   |   |   |   |  |   |
| JCVIGM_167424_20110307 | gltA | glutamate synthase (NADPH), homotetrameric                  |  |   |   |   |    |   |   |   |   |   |   |   |   |   |   |  |   |
| JCVIGM_009248_20110307 | gap  | glyceraldehyde 3-phosphate dehydrogenase, C-terminal domain |  |   |   |   |    |   |   |   |   |   |   |   |   |   |   |  |   |
| JCVIGM_027319_20110307 |      | glyceraldehyde 3-phosphate dehydrogenase, C-terminal domain |  |   |   |   |    |   |   |   |   | 2 |   |   |   |   | 1 |  |   |
| JCVIGM_075124_20110307 |      | glyceraldehyde 3-phosphate dehydrogenase, C-terminal domain |  |   |   |   |    |   |   |   |   |   |   |   |   |   |   |  |   |
| JCVIGM_079320_20110307 |      | glyceraldehyde 3-phosphate dehydrogenase, C-terminal domain |  |   |   |   |    |   |   |   |   |   |   |   |   |   | 1 |  |   |
| JCVIGM_083011_20110307 |      | glyceraldehyde 3-phosphate dehydrogenase, C-terminal domain |  |   |   |   |    |   |   |   |   |   |   |   |   |   |   |  |   |
| JCVIGM_088090_20110307 |      | glyceraldehyde 3-phosphate dehydrogenase, C-terminal domain |  |   |   |   | 1  |   |   |   |   |   |   |   |   |   |   |  |   |
| JCVIGM_141419_20110307 |      | glyceraldehyde 3-phosphate dehydrogenase, C-terminal domain |  |   |   |   |    |   |   |   |   |   |   |   |   |   |   |  |   |
| JCVIGM_159787_20110307 |      | glyceraldehyde 3-phosphate dehydrogenase, C-terminal domain |  |   |   |   |    |   |   |   |   |   |   |   |   |   |   |  |   |
| JCVIGM_169660_20110307 |      | glyceraldehyde 3-phosphate dehydrogenase, C-terminal domain |  |   |   |   |    |   |   |   |   |   |   |   |   |   |   |  |   |
| JCVIGM_170407_20110307 |      | glyceraldehyde 3-phosphate dehydrogenase, C-terminal domain |  |   |   |   |    |   |   |   |   |   |   |   |   |   |   |  |   |
| JCVIGM_189194_20110307 |      | glyceraldehyde 3-phosphate dehydrogenase, C-terminal domain |  | 2 | 2 | 1 | 2  | 1 | 1 | 1 | 2 | 3 | 2 | 2 | 2 | 1 | 1 |  | 1 |
| JCVIGM_224384_20110307 |      | glyceraldehyde 3-phosphate dehydrogenase, C-terminal domain |  | 2 | 3 | 2 | 1  | 2 |   | 1 |   | 3 | 3 |   |   | 3 |   |  |   |
| JCVIGM_268659_20110307 |      | glyceraldehyde 3-phosphate dehydrogenase, C-terminal domain |  |   |   |   |    |   |   |   |   |   | 2 |   |   |   |   |  |   |













|                        |                      |   |  |  |  |  |   |   |   |   |   |   |   |   |   |   |  |  |  |  |
|------------------------|----------------------|---|--|--|--|--|---|---|---|---|---|---|---|---|---|---|--|--|--|--|
| JCVIGM_189376_20110307 | hypothetical protein | 1 |  |  |  |  | 1 |   |   |   |   |   |   |   |   |   |  |  |  |  |
| JCVIGM_189604_20110307 | hypothetical protein |   |  |  |  |  |   |   |   |   |   |   |   |   |   |   |  |  |  |  |
| JCVIGM_190292_20110307 | hypothetical protein |   |  |  |  |  |   |   |   |   |   |   |   |   |   |   |  |  |  |  |
| JCVIGM_190977_20110307 | hypothetical protein |   |  |  |  |  |   |   |   |   |   |   |   |   |   |   |  |  |  |  |
| JCVIGM_191291_20110307 | hypothetical protein |   |  |  |  |  |   | 1 |   |   |   |   |   | 1 |   |   |  |  |  |  |
| JCVIGM_191293_20110307 | hypothetical protein |   |  |  |  |  |   |   |   |   |   |   |   |   |   |   |  |  |  |  |
| JCVIGM_191827_20110307 | hypothetical protein |   |  |  |  |  |   |   |   |   |   |   |   |   |   |   |  |  |  |  |
| JCVIGM_191888_20110307 | hypothetical protein |   |  |  |  |  |   |   |   |   |   |   |   |   |   |   |  |  |  |  |
| JCVIGM_192065_20110307 | hypothetical protein |   |  |  |  |  |   |   |   |   |   |   |   |   |   |   |  |  |  |  |
| JCVIGM_194742_20110307 | hypothetical protein |   |  |  |  |  |   |   |   |   |   |   |   |   |   |   |  |  |  |  |
| JCVIGM_194897_20110307 | hypothetical protein |   |  |  |  |  |   |   |   |   |   |   |   |   |   |   |  |  |  |  |
| JCVIGM_195386_20110307 | hypothetical protein |   |  |  |  |  |   |   |   |   |   |   |   |   |   |   |  |  |  |  |
| JCVIGM_196029_20110307 | hypothetical protein |   |  |  |  |  |   |   |   |   |   |   |   |   |   |   |  |  |  |  |
| JCVIGM_202561_20110307 | hypothetical protein |   |  |  |  |  |   |   |   |   |   |   |   |   |   |   |  |  |  |  |
| JCVIGM_203237_20110307 | hypothetical protein |   |  |  |  |  |   | 1 |   |   |   |   |   |   |   |   |  |  |  |  |
| JCVIGM_204096_20110307 | hypothetical protein |   |  |  |  |  |   |   |   |   |   |   |   |   |   |   |  |  |  |  |
| JCVIGM_205608_20110307 | hypothetical protein |   |  |  |  |  |   |   |   |   |   |   |   |   |   |   |  |  |  |  |
| JCVIGM_207243_20110307 | hypothetical protein |   |  |  |  |  |   |   |   |   |   |   |   |   |   |   |  |  |  |  |
| JCVIGM_209517_20110307 | hypothetical protein |   |  |  |  |  |   |   | 2 | 3 | 1 |   |   | 1 | 1 |   |  |  |  |  |
| JCVIGM_210696_20110307 | hypothetical protein |   |  |  |  |  |   | 2 |   |   |   |   |   | 1 | 1 |   |  |  |  |  |
| JCVIGM_210946_20110307 | hypothetical protein |   |  |  |  |  |   | 1 | 1 | 2 | 2 | 1 | 1 | 1 |   |   |  |  |  |  |
| JCVIGM_211394_20110307 | hypothetical protein |   |  |  |  |  |   |   | 1 |   |   |   |   | 1 |   |   |  |  |  |  |
| JCVIGM_212706_20110307 | hypothetical protein |   |  |  |  |  |   |   |   |   |   |   |   |   |   |   |  |  |  |  |
| JCVIGM_213389_20110307 | hypothetical protein |   |  |  |  |  |   |   | 1 | 1 | 2 | 1 | 2 | 1 |   |   |  |  |  |  |
| JCVIGM_219434_20110307 | hypothetical protein |   |  |  |  |  |   |   |   |   |   |   |   |   |   |   |  |  |  |  |
| JCVIGM_219781_20110307 | hypothetical protein |   |  |  |  |  |   |   |   |   |   |   |   |   |   |   |  |  |  |  |
| JCVIGM_222747_20110307 | hypothetical protein |   |  |  |  |  |   |   |   |   |   |   |   |   |   |   |  |  |  |  |
| JCVIGM_229339_20110307 | hypothetical protein |   |  |  |  |  |   |   | 1 | 2 |   |   |   |   |   |   |  |  |  |  |
| JCVIGM_234241_20110307 | hypothetical protein |   |  |  |  |  |   |   |   |   |   |   |   |   |   |   |  |  |  |  |
| JCVIGM_237601_20110307 | hypothetical protein |   |  |  |  |  |   |   |   |   |   |   |   |   |   |   |  |  |  |  |
| JCVIGM_239052_20110307 | hypothetical protein |   |  |  |  |  |   |   |   |   |   |   |   |   |   |   |  |  |  |  |
| JCVIGM_245141_20110307 | hypothetical protein |   |  |  |  |  |   |   |   | 2 |   |   | 1 | 1 | 1 | 1 |  |  |  |  |



|                        |                      |  |  |  |  |   |   |   |   |   |   |   |   |   |   |   |  |  |  |
|------------------------|----------------------|--|--|--|--|---|---|---|---|---|---|---|---|---|---|---|--|--|--|
| JCVIGM_302456_20110307 | hypothetical protein |  |  |  |  | 2 | 2 |   |   | 1 | 1 | 1 |   |   |   |   |  |  |  |
| JCVIGM_303429_20110307 | hypothetical protein |  |  |  |  |   |   |   |   |   |   |   |   |   |   |   |  |  |  |
| JCVIGM_303566_20110307 | hypothetical protein |  |  |  |  |   |   |   |   |   |   |   |   |   | 2 |   |  |  |  |
| JCVIGM_303609_20110307 | hypothetical protein |  |  |  |  |   |   |   |   |   |   |   |   |   |   |   |  |  |  |
| JCVIGM_303798_20110307 | hypothetical protein |  |  |  |  | 4 | 1 |   |   | 1 | 3 | 1 |   |   |   |   |  |  |  |
| JCVIGM_306883_20110307 | hypothetical protein |  |  |  |  |   |   |   |   |   |   |   |   |   |   |   |  |  |  |
| JCVIGM_306884_20110307 | hypothetical protein |  |  |  |  |   |   |   |   |   |   |   |   |   |   |   |  |  |  |
| JCVIGM_307057_20110307 | hypothetical protein |  |  |  |  |   |   |   |   |   |   |   |   |   |   |   |  |  |  |
| JCVIGM_307436_20110307 | hypothetical protein |  |  |  |  |   |   |   |   |   |   |   |   |   |   |   |  |  |  |
| JCVIGM_307765_20110307 | hypothetical protein |  |  |  |  |   |   |   |   |   |   |   |   |   |   |   |  |  |  |
| JCVIGM_309808_20110307 | hypothetical protein |  |  |  |  |   | 1 | 1 |   |   |   | 1 | 2 | 1 |   |   |  |  |  |
| JCVIGM_310529_20110307 | hypothetical protein |  |  |  |  |   |   |   |   |   |   |   |   |   |   |   |  |  |  |
| JCVIGM_313684_20110307 | hypothetical protein |  |  |  |  |   |   |   |   |   |   |   |   |   |   |   |  |  |  |
| JCVIGM_314099_20110307 | hypothetical protein |  |  |  |  |   |   |   |   |   |   |   |   |   |   |   |  |  |  |
| JCVIGM_314549_20110307 | hypothetical protein |  |  |  |  | 1 | 1 | 2 | 3 |   | 1 | 1 | 1 | 1 |   |   |  |  |  |
| JCVIGM_319934_20110307 | hypothetical protein |  |  |  |  |   |   |   |   |   |   |   |   |   |   |   |  |  |  |
| JCVIGM_322352_20110307 | hypothetical protein |  |  |  |  |   |   |   |   |   |   |   |   |   |   |   |  |  |  |
| JCVIGM_323810_20110307 | hypothetical protein |  |  |  |  |   |   |   |   |   |   |   |   |   |   |   |  |  |  |
| JCVIGM_327403_20110307 | hypothetical protein |  |  |  |  |   |   |   |   |   |   | 1 | 1 |   |   |   |  |  |  |
| JCVIGM_328614_20110307 | hypothetical protein |  |  |  |  |   |   |   |   |   |   |   |   |   |   |   |  |  |  |
| JCVIGM_332056_20110307 | hypothetical protein |  |  |  |  |   |   |   |   |   |   |   |   |   |   |   |  |  |  |
| JCVIGM_332688_20110307 | hypothetical protein |  |  |  |  |   |   |   |   |   |   |   |   |   |   |   |  |  |  |
| JCVIGM_333745_20110307 | hypothetical protein |  |  |  |  |   | 1 | 1 | 1 | 1 | 2 | 1 |   | 1 | 3 | 2 |  |  |  |
| JCVIGM_336004_20110307 | hypothetical protein |  |  |  |  |   | 2 |   |   |   |   |   |   |   |   |   |  |  |  |
| JCVIGM_336057_20110307 | hypothetical protein |  |  |  |  |   |   |   |   |   |   |   |   |   |   |   |  |  |  |
| JCVIGM_340014_20110307 | hypothetical protein |  |  |  |  |   | 2 |   | 1 | 1 |   | 1 | 1 | 2 | 1 | 1 |  |  |  |
| JCVIGM_340609_20110307 | hypothetical protein |  |  |  |  | 2 | 4 | 1 |   | 1 |   | 1 | 2 | 3 | 4 | 2 |  |  |  |
| JCVIGM_341200_20110307 | hypothetical protein |  |  |  |  |   |   | 1 |   |   | 4 | 2 | 4 |   |   |   |  |  |  |



|                        |                      |   |   |   |   |   |   |  |  |   |   |   |   |   |  |  |  |  |
|------------------------|----------------------|---|---|---|---|---|---|--|--|---|---|---|---|---|--|--|--|--|
| JCVIGM_344661_20110307 | hypothetical protein |   |   |   |   |   |   |  |  |   |   |   |   |   |  |  |  |  |
| JCVIGM_345968_20110307 | hypothetical protein |   |   |   |   |   |   |  |  |   |   |   |   |   |  |  |  |  |
| JCVIGM_348560_20110307 | hypothetical protein |   |   |   |   |   |   |  |  |   |   |   |   |   |  |  |  |  |
| JCVIGM_351456_20110307 | hypothetical protein |   |   |   |   |   |   |  |  |   |   |   |   |   |  |  |  |  |
| JCVIGM_359900_20110307 | hypothetical protein |   |   |   |   |   |   |  |  |   |   |   |   |   |  |  |  |  |
| JCVIGM_362686_20110307 | hypothetical protein |   |   | 1 |   | 1 |   |  |  |   | 1 | 1 |   |   |  |  |  |  |
| JCVIGM_364085_20110307 | hypothetical protein |   |   |   | 2 |   |   |  |  | 1 | 1 | 1 |   |   |  |  |  |  |
| JCVIGM_365092_20110307 | hypothetical protein |   |   |   |   |   |   |  |  |   |   |   |   |   |  |  |  |  |
| JCVIGM_367321_20110307 | hypothetical protein |   |   |   |   |   |   |  |  |   |   |   |   |   |  |  |  |  |
| JCVIGM_367720_20110307 | hypothetical protein | 2 |   |   |   | 1 | 2 |  |  |   |   |   |   |   |  |  |  |  |
| JCVIGM_368650_20110307 | hypothetical protein |   |   |   |   |   |   |  |  |   |   |   |   |   |  |  |  |  |
| JCVIGM_369484_20110307 | hypothetical protein |   |   | 1 | 1 | 1 |   |  |  |   |   |   |   |   |  |  |  |  |
| JCVIGM_371571_20110307 | hypothetical protein |   |   |   |   |   |   |  |  |   |   |   |   |   |  |  |  |  |
| JCVIGM_372380_20110307 | hypothetical protein |   |   |   |   |   |   |  |  |   |   |   |   |   |  |  |  |  |
| JCVIGM_373222_20110307 | hypothetical protein |   |   |   |   |   |   |  |  |   |   |   |   |   |  |  |  |  |
| JCVIGM_373315_20110307 | hypothetical protein | 1 |   |   |   |   |   |  |  |   |   |   |   | 1 |  |  |  |  |
| JCVIGM_375019_20110307 | hypothetical protein |   |   |   |   |   |   |  |  |   |   |   |   |   |  |  |  |  |
| JCVIGM_379110_20110307 | hypothetical protein |   |   |   |   |   |   |  |  |   |   |   |   |   |  |  |  |  |
| JCVIGM_380771_20110307 | hypothetical protein |   |   |   |   |   |   |  |  |   |   |   |   |   |  |  |  |  |
| JCVIGM_387933_20110307 | hypothetical protein |   |   |   |   |   |   |  |  |   |   |   |   |   |  |  |  |  |
| JCVIGM_390199_20110307 | hypothetical protein |   |   |   |   |   |   |  |  |   |   |   |   |   |  |  |  |  |
| JCVIGM_390242_20110307 | hypothetical protein |   |   |   |   |   |   |  |  |   |   |   |   |   |  |  |  |  |
| JCVIGM_390806_20110307 | hypothetical protein |   |   |   |   |   |   |  |  |   |   |   |   |   |  |  |  |  |
| JCVIGM_391550_20110307 | hypothetical protein |   |   |   |   |   |   |  |  |   |   |   |   |   |  |  |  |  |
| JCVIGM_393860_20110307 | hypothetical protein |   |   |   |   |   |   |  |  |   |   |   |   | 1 |  |  |  |  |
| JCVIGM_398055_20110307 | hypothetical protein |   |   |   |   |   |   |  |  |   |   |   |   |   |  |  |  |  |
| JCVIGM_398168_20110307 | hypothetical protein |   |   |   |   |   |   |  |  |   |   |   |   |   |  |  |  |  |
| JCVIGM_399462_20110307 | hypothetical protein |   |   |   |   | 1 | 1 |  |  |   |   |   |   |   |  |  |  |  |
| JCVIGM_400027_20110307 | hypothetical protein |   | 2 | 2 |   |   |   |  |  |   | 1 | 1 | 1 | 2 |  |  |  |  |



|                        |       |                                                               |  |  |   |   |   |   |   |   |   |   |   |   |  |   |  |   |   |  |
|------------------------|-------|---------------------------------------------------------------|--|--|---|---|---|---|---|---|---|---|---|---|--|---|--|---|---|--|
| JCVIGM_091917_20110307 |       | inositol-3-phosphate synthase                                 |  |  |   |   |   |   |   |   |   |   |   |   |  |   |  |   |   |  |
| JCVIGM_184954_20110307 |       | integral membrane sensor signal transduction histidine kinase |  |  |   |   |   |   |   |   |   |   |   |   |  | 1 |  |   | 1 |  |
| JCVIGM_065899_20110307 |       | internalin-related protein                                    |  |  |   | 1 | 1 | 1 | 3 |   |   |   |   | 1 |  |   |  |   |   |  |
| JCVIGM_120727_20110307 | ilvC  | ketol-acid reductoisomerase                                   |  |  |   |   |   |   |   |   |   |   |   |   |  |   |  |   |   |  |
| JCVIGM_156339_20110307 | ilvC  | ketol-acid reductoisomerase                                   |  |  | 1 |   |   |   |   |   |   |   |   |   |  |   |  |   |   |  |
| JCVIGM_185462_20110307 | ilvC  | ketol-acid reductoisomerase                                   |  |  |   | 1 | 1 |   |   |   |   |   |   |   |  |   |  |   |   |  |
| JCVIGM_251867_20110307 | ilvC  | ketol-acid reductoisomerase                                   |  |  |   |   |   |   |   |   |   |   |   |   |  |   |  |   |   |  |
| JCVIGM_287230_20110307 | ilvC  | ketol-acid reductoisomerase                                   |  |  |   |   |   |   |   |   |   |   |   |   |  |   |  |   |   |  |
| JCVIGM_322248_20110307 | ilvC  | ketol-acid reductoisomerase                                   |  |  |   |   |   |   |   |   |   |   |   |   |  |   |  |   |   |  |
| JCVIGM_062252_20110307 |       | ketose-bisphosphate aldolase, class II                        |  |  |   |   | 1 |   |   | 1 | 1 |   |   |   |  |   |  |   |   |  |
| JCVIGM_128542_20110307 |       | ketose-bisphosphate aldolase, class II                        |  |  |   | 1 | 3 |   |   | 3 |   |   |   |   |  |   |  |   |   |  |
| JCVIGM_260030_20110307 |       | KHG/KDPG family aldolase/carbohydrate kinase, pfkB family     |  |  |   |   |   |   |   |   |   |   |   |   |  |   |  |   |   |  |
| JCVIGM_418431_20110307 |       | kinase, pfkB family                                           |  |  |   |   |   |   |   |   |   |   |   |   |  |   |  |   |   |  |
| JCVIGM_025581_20110307 | araA  | L-arabinose isomerase                                         |  |  | 1 |   |   |   |   | 1 |   |   |   |   |  |   |  | 1 |   |  |
| JCVIGM_046489_20110307 | araA  | L-arabinose isomerase                                         |  |  |   |   |   |   |   |   |   |   |   |   |  |   |  |   |   |  |
| JCVIGM_060257_20110307 | araA  | L-arabinose isomerase                                         |  |  | 7 |   | 1 |   |   |   |   |   |   |   |  |   |  |   |   |  |
| JCVIGM_073944_20110307 | araA  | L-arabinose isomerase                                         |  |  |   |   |   |   |   | 3 | 1 | 2 |   |   |  |   |  |   |   |  |
| JCVIGM_074178_20110307 | araA  | L-arabinose isomerase                                         |  |  |   |   |   |   |   | 1 | 1 |   | 1 |   |  |   |  |   |   |  |
| JCVIGM_086747_20110307 | araA  | L-arabinose isomerase                                         |  |  |   | 3 | 1 |   |   | 1 | 1 | 3 |   |   |  |   |  |   |   |  |
| JCVIGM_088705_20110307 | araA  | L-arabinose isomerase                                         |  |  |   |   |   | 1 |   |   |   | 1 |   |   |  |   |  |   |   |  |
| JCVIGM_168776_20110307 | araA  | L-arabinose isomerase                                         |  |  |   |   |   |   |   | 1 |   |   |   |   |  |   |  |   |   |  |
| JCVIGM_206950_20110307 | araA1 | L-arabinose isomerase 1                                       |  |  |   |   |   |   |   |   |   |   |   |   |  |   |  |   |   |  |
| JCVIGM_102423_20110307 |       | L-asparaginase                                                |  |  |   |   |   |   |   |   |   |   |   |   |  |   |  |   |   |  |
| JCVIGM_051778_20110307 |       | L-asparaginase, type II                                       |  |  |   |   |   |   |   |   |   |   |   |   |  |   |  |   |   |  |
| JCVIGM_177219_20110307 |       | L-fucose isomerase and related proteins                       |  |  |   |   |   |   |   |   |   |   |   |   |  |   |  |   |   |  |
| JCVIGM_022476_20110307 | fucl  | L-fucose isomerase, C-terminal domain                         |  |  |   |   |   |   |   |   |   |   |   |   |  |   |  |   |   |  |
| JCVIGM_059070_20110307 |       | L-fucose isomerase, C-terminal domain                         |  |  | 1 |   |   |   |   |   |   |   |   |   |  |   |  |   |   |  |
| JCVIGM_066045_20110307 |       | L-fucose isomerase, C-terminal domain                         |  |  |   |   |   |   |   |   |   |   |   |   |  |   |  |   |   |  |
| JCVIGM_101032_20110307 |       | L-fucose isomerase, C-terminal domain                         |  |  | 1 |   |   |   |   |   |   | 1 |   |   |  |   |  |   |   |  |
| JCVIGM_106686_20110307 |       | L-fucose isomerase, C-terminal domain                         |  |  |   | 1 | 1 |   |   | 1 |   |   | 2 |   |  |   |  |   |   |  |







|                        |      |                                                                                                |  |  |   |   |   |   |   |   |   |   |   |   |   |   |   |   |  |   |
|------------------------|------|------------------------------------------------------------------------------------------------|--|--|---|---|---|---|---|---|---|---|---|---|---|---|---|---|--|---|
| JCVIGM_200200_20110307 | pckA | phosphoenolpyruvate carboxykinase (ATP)                                                        |  |  | 1 | 1 |   | 1 |   |   |   |   | 1 |   |   |   |   |   |  |   |
| JCVIGM_212975_20110307 |      | phosphoenolpyruvate carboxykinase (ATP)                                                        |  |  | 3 | 2 | 1 | 3 | 2 | 1 | 2 | 1 | 1 | 4 | 3 | 2 |   |   |  |   |
| JCVIGM_214913_20110307 | pckA | phosphoenolpyruvate carboxykinase (ATP)                                                        |  |  |   |   |   |   |   |   |   |   |   |   |   |   |   |   |  |   |
| JCVIGM_219457_20110307 | pckA | phosphoenolpyruvate carboxykinase (ATP)                                                        |  |  |   |   |   |   |   |   |   |   |   |   |   |   |   |   |  |   |
| JCVIGM_255519_20110307 | pckA | phosphoenolpyruvate carboxykinase (ATP)                                                        |  |  |   |   |   |   |   |   |   |   |   |   |   |   |   |   |  |   |
| JCVIGM_257324_20110307 | pckA | phosphoenolpyruvate carboxykinase (ATP)                                                        |  |  | 1 |   | 1 | 2 |   |   |   |   | 2 | 2 | 2 |   |   |   |  |   |
| JCVIGM_259940_20110307 | pckG | phosphoenolpyruvate carboxykinase (ATP)                                                        |  |  |   |   |   |   |   |   |   |   |   |   |   |   |   |   |  |   |
| JCVIGM_297711_20110307 | pckA | phosphoenolpyruvate carboxykinase (ATP)                                                        |  |  | 1 |   |   |   |   |   |   |   |   | 1 |   |   |   |   |  |   |
| JCVIGM_315164_20110307 | pckA | phosphoenolpyruvate carboxykinase (ATP)                                                        |  |  | 1 |   | 1 |   |   |   | 1 |   | 1 |   |   |   |   |   |  |   |
| JCVIGM_315431_20110307 | pckA | phosphoenolpyruvate carboxykinase (ATP)                                                        |  |  | 2 | 3 | 1 | 1 | 2 |   | 1 | 1 | 1 | 3 | 3 |   |   |   |  |   |
| JCVIGM_423536_20110307 |      | phosphoenolpyruvate carboxykinase (ATP)                                                        |  |  |   |   |   |   |   |   |   |   |   |   |   |   |   |   |  |   |
| JCVIGM_070299_20110307 | pckA | phosphoenolpyruvate carboxykinase [ATP]                                                        |  |  | 2 | 1 | 1 | 3 | 2 | 4 | 2 | 2 | 2 | 3 | 3 | 1 | 2 |   |  |   |
| JCVIGM_127286_20110307 | pckA | phosphoenolpyruvate carboxykinase [ATP]                                                        |  |  |   |   |   |   |   |   |   |   |   |   |   |   |   |   |  |   |
| JCVIGM_216386_20110307 | manL | phosphoenolpyruvate-dependent sugar phosphotransferase system EIIAB, probably mannose specific |  |  |   |   |   |   |   |   |   |   |   |   |   |   |   |   |  |   |
| JCVIGM_007589_20110307 | pgk  | phosphoglycerate kinase                                                                        |  |  |   |   |   |   |   |   |   |   |   |   |   |   |   |   |  |   |
| JCVIGM_015380_20110307 | pgk  | phosphoglycerate kinase                                                                        |  |  |   |   |   |   |   |   |   |   |   |   |   |   |   |   |  |   |
| JCVIGM_027320_20110307 | pgk  | phosphoglycerate kinase                                                                        |  |  | 1 |   | 3 | 1 | 2 |   | 2 | 2 | 1 | 1 |   |   |   |   |  |   |
| JCVIGM_061465_20110307 | pgk  | phosphoglycerate kinase                                                                        |  |  |   |   |   |   |   |   |   |   |   |   |   |   |   |   |  |   |
| JCVIGM_079319_20110307 | pgk  | phosphoglycerate kinase                                                                        |  |  |   |   |   |   |   |   |   |   |   |   |   |   |   |   |  |   |
| JCVIGM_095819_20110307 | pgk  | phosphoglycerate kinase                                                                        |  |  |   |   |   |   |   |   |   |   | 1 |   |   |   |   |   |  |   |
| JCVIGM_113192_20110307 | pgk  | phosphoglycerate kinase                                                                        |  |  |   | 1 | 1 | 1 |   |   |   |   |   |   |   |   |   |   |  |   |
| JCVIGM_122299_20110307 | pgk  | phosphoglycerate kinase                                                                        |  |  |   |   |   |   |   |   |   |   |   |   |   |   |   |   |  |   |
| JCVIGM_122514_20110307 | pgk  | phosphoglycerate kinase                                                                        |  |  |   |   | 1 |   |   |   | 1 |   |   | 1 |   |   |   |   |  |   |
| JCVIGM_152568_20110307 | pgk  | phosphoglycerate kinase                                                                        |  |  |   |   |   |   |   |   |   |   |   |   |   |   |   |   |  |   |
| JCVIGM_161540_20110307 | pgk  | phosphoglycerate kinase                                                                        |  |  |   |   | 1 |   |   |   |   |   | 2 |   |   |   |   |   |  |   |
| JCVIGM_195337_20110307 | pgk  | phosphoglycerate kinase                                                                        |  |  |   |   |   |   |   |   |   |   |   |   |   |   |   |   |  |   |
| JCVIGM_234057_20110307 | pgk  | phosphoglycerate kinase                                                                        |  |  |   |   |   |   |   |   |   |   |   |   |   |   |   |   |  |   |
| JCVIGM_239710_20110307 | pgk  | phosphoglycerate kinase                                                                        |  |  |   |   |   |   |   |   |   |   |   |   |   |   |   |   |  |   |
| JCVIGM_240738_20110307 | pgk  | phosphoglycerate kinase                                                                        |  |  | 1 | 3 |   | 1 |   |   |   |   | 2 |   |   |   |   |   |  |   |
| JCVIGM_249205_20110307 | pgk  | phosphoglycerate kinase                                                                        |  |  |   |   |   |   |   |   |   |   |   |   |   |   |   |   |  |   |
| JCVIGM_260432_20110307 | pgk  | phosphoglycerate kinase                                                                        |  |  |   |   |   |   |   |   |   |   |   |   |   |   |   | 1 |  | 1 |









|                        |      |                                              |  |  |  |  |   |   |   |   |   |   |   |   |   |   |  |   |   |   |   |
|------------------------|------|----------------------------------------------|--|--|--|--|---|---|---|---|---|---|---|---|---|---|--|---|---|---|---|
| JCVIGM_131224_20110307 | rplJ | ribosomal protein L10                        |  |  |  |  |   |   |   |   |   |   |   |   |   |   |  | 2 |   |   |   |
| JCVIGM_210248_20110307 | rplJ | ribosomal protein L10                        |  |  |  |  |   |   |   |   |   |   |   |   |   |   |  | 1 |   |   |   |
| JCVIGM_226856_20110307 | rplJ | ribosomal protein L10                        |  |  |  |  |   |   |   |   |   |   |   |   |   |   |  | 1 |   | 1 |   |
| JCVIGM_082097_20110307 | rplK | ribosomal protein L11                        |  |  |  |  |   |   |   |   |   |   |   |   |   |   |  |   |   |   |   |
| JCVIGM_084768_20110307 | rplK | ribosomal protein L11                        |  |  |  |  | 1 |   |   |   |   |   |   |   |   |   |  |   |   |   |   |
| JCVIGM_136348_20110307 | rplK | ribosomal protein L11                        |  |  |  |  |   |   |   |   |   |   |   |   |   |   |  |   |   |   |   |
| JCVIGM_257392_20110307 | rplK | ribosomal protein L11                        |  |  |  |  | 2 |   |   |   |   |   |   |   |   |   |  |   |   |   |   |
| JCVIGM_077076_20110307 | rplK | ribosomal protein L11, N-terminal domain     |  |  |  |  | 2 | 1 | 7 | 3 | 5 | 1 | 3 | 3 | 3 | 2 |  |   | 1 |   |   |
| JCVIGM_097373_20110307 | rplK | ribosomal protein L11, N-terminal domain     |  |  |  |  |   |   | 1 | 1 |   |   | 1 |   |   |   |  |   |   |   |   |
| JCVIGM_045961_20110307 | rplB | ribosomal protein L2                         |  |  |  |  |   |   |   |   |   |   |   |   |   |   |  |   |   |   |   |
| JCVIGM_119829_20110307 | rplB | ribosomal protein L2                         |  |  |  |  |   |   |   |   |   |   |   |   |   | 1 |  |   |   |   |   |
| JCVIGM_193483_20110307 | rplB | ribosomal protein L2                         |  |  |  |  |   |   |   |   |   |   |   |   |   |   |  |   |   |   |   |
| JCVIGM_159582_20110307 | rplW | ribosomal protein L23                        |  |  |  |  |   |   |   |   |   |   |   |   |   |   |  |   |   |   |   |
| JCVIGM_006060_20110307 | rplL | ribosomal protein L7/L12                     |  |  |  |  |   |   |   |   |   |   |   |   |   |   |  |   |   |   |   |
| JCVIGM_054869_20110307 | rplL | ribosomal protein L7/L12                     |  |  |  |  |   |   |   |   |   |   |   |   |   |   |  |   |   |   |   |
| JCVIGM_156392_20110307 | rplL | ribosomal protein L7/L12                     |  |  |  |  |   |   |   |   |   |   |   |   |   |   |  |   |   |   |   |
| JCVIGM_159116_20110307 | rplL | ribosomal protein L7/L12                     |  |  |  |  | 1 |   | 3 | 3 | 1 | 8 | 2 |   | 1 | 1 |  |   |   |   |   |
| JCVIGM_163260_20110307 | rplL | ribosomal protein L7/L12                     |  |  |  |  |   |   |   |   |   |   | 1 |   |   |   |  |   |   |   |   |
| JCVIGM_327331_20110307 | rplL | ribosomal protein L7/L12                     |  |  |  |  |   |   |   |   |   |   |   |   |   |   |  |   |   |   |   |
| JCVIGM_274754_20110307 | rpsJ | ribosomal protein S10                        |  |  |  |  |   |   |   |   |   |   |   |   |   |   |  |   |   |   |   |
| JCVIGM_021052_20110307 | rpsG | ribosomal protein S7                         |  |  |  |  |   |   |   |   |   |   |   |   |   |   |  |   |   |   |   |
| JCVIGM_089527_20110307 | rpsH | ribosomal protein S8                         |  |  |  |  |   |   |   | 1 |   |   |   |   |   |   |  |   |   |   |   |
| JCVIGM_106685_20110307 | rpsH | ribosomal protein S8                         |  |  |  |  |   |   | 1 | 1 |   |   |   |   | 1 |   |  |   |   |   |   |
| JCVIGM_116015_20110307 | rpsH | ribosomal protein S8                         |  |  |  |  |   |   |   |   |   |   |   |   |   |   |  |   |   |   |   |
| JCVIGM_158733_20110307 | rpsH | ribosomal protein S8                         |  |  |  |  |   |   |   |   |   |   |   |   |   |   |  |   |   |   |   |
| JCVIGM_202567_20110307 | rpsH | ribosomal protein S8                         |  |  |  |  |   |   |   |   |   |   |   |   |   |   |  |   |   |   |   |
| JCVIGM_216187_20110307 | rpsH | ribosomal protein S8                         |  |  |  |  |   |   |   |   |   |   |   |   |   |   |  |   |   |   |   |
| JCVIGM_114301_20110307 | rpsI | ribosomal protein S9/S16                     |  |  |  |  |   |   |   |   |   |   |   |   |   |   |  |   |   |   |   |
| JCVIGM_393651_20110307 | rpoD | RNA polymerase sigma factor                  |  |  |  |  |   |   |   |   |   |   |   |   |   |   |  | 1 | 1 |   | 1 |
| JCVIGM_229570_20110307 |      | RNA polymerase sigma factor, sigma-70 family |  |  |  |  |   |   |   |   |   |   |   |   |   |   |  |   |   |   |   |
| JCVIGM_007913_20110307 |      | rubredoxin                                   |  |  |  |  |   |   |   | 2 |   |   |   |   |   |   |  |   | 1 |   | 1 |

















|                        |      |                                                                           |  |   |  |   |  |   |  |   |   |  |   |   |   |   |   |
|------------------------|------|---------------------------------------------------------------------------|--|---|--|---|--|---|--|---|---|--|---|---|---|---|---|
| JCVIGM_000407_20110307 | dnaK | chaperone protein dnaK                                                    |  |   |  |   |  |   |  |   |   |  |   |   |   |   | 1 |
| JCVIGM_021700_20110307 | dnaK | chaperone protein dnaK                                                    |  |   |  |   |  |   |  |   |   |  |   |   |   |   |   |
| JCVIGM_031425_20110307 | dnaK | chaperone protein dnaK                                                    |  | 1 |  |   |  |   |  |   |   |  |   |   |   |   | 1 |
| JCVIGM_032528_20110307 | dnaK | chaperone protein dnaK                                                    |  | 1 |  | 1 |  |   |  |   | 1 |  | 1 |   |   |   | 1 |
| JCVIGM_034511_20110307 | dnaK | chaperone protein dnaK                                                    |  |   |  |   |  |   |  |   |   |  |   |   |   |   |   |
| JCVIGM_043298_20110307 | dnaK | chaperone protein dnaK                                                    |  |   |  |   |  |   |  |   |   |  |   |   |   |   |   |
| JCVIGM_062282_20110307 | dnaK | chaperone protein dnaK                                                    |  |   |  |   |  |   |  |   |   |  |   |   |   |   |   |
| JCVIGM_122947_20110307 | dnaK | chaperone protein dnaK                                                    |  |   |  |   |  |   |  |   |   |  |   |   |   |   |   |
| JCVIGM_147511_20110307 | dnaK | chaperone protein dnaK                                                    |  |   |  |   |  |   |  |   |   |  |   |   |   |   | 1 |
| JCVIGM_213960_20110307 | dnaK | chaperone protein dnaK                                                    |  |   |  |   |  |   |  |   |   |  |   |   |   |   | 1 |
| JCVIGM_236768_20110307 | dnaK | chaperone protein dnaK                                                    |  |   |  |   |  |   |  |   |   |  |   |   |   |   |   |
| JCVIGM_086927_20110307 | groS | chaperonin 10 Kd subunit                                                  |  |   |  |   |  | 1 |  |   |   |  |   |   |   | 1 |   |
| JCVIGM_187049_20110307 | groS | chaperonin 10 Kd subunit                                                  |  | 2 |  |   |  |   |  |   |   |  |   |   |   |   |   |
| JCVIGM_213821_20110307 | groS | chaperonin 10 Kd subunit                                                  |  |   |  |   |  | 1 |  |   |   |  |   |   |   |   |   |
| JCVIGM_401604_20110307 | groS | chaperonin 10 Kd subunit                                                  |  |   |  |   |  |   |  |   |   |  |   |   |   |   |   |
| JCVIGM_413734_20110307 |      | CO dehydrogenase/acetyl-coA synthase complex, beta subunit                |  |   |  |   |  |   |  | 1 | 1 |  | 1 |   | 2 |   |   |
| JCVIGM_049251_20110307 | cdhC | CO dehydrogenase/CO-methylating acetyl-coA synthase complex, beta subunit |  | 4 |  |   |  |   |  |   |   |  |   |   |   |   |   |
| JCVIGM_339054_20110307 |      | coenzyme B12-dependent glycerol dehydratase, large subunit                |  |   |  |   |  |   |  |   |   |  |   |   |   |   | 1 |
| JCVIGM_212787_20110307 |      | cof-like hydrolase                                                        |  |   |  |   |  |   |  |   |   |  |   |   |   |   |   |
| JCVIGM_127608_20110307 |      | ComEC/Rec2-like protein                                                   |  |   |  |   |  |   |  |   |   |  |   |   |   |   | 1 |
| JCVIGM_286641_20110307 |      | conserved hypothetical protein                                            |  |   |  |   |  |   |  |   |   |  |   |   |   |   |   |
| JCVIGM_049253_20110307 |      | corrinoid/iron-sulfur protein, large subunit                              |  |   |  |   |  |   |  |   |   |  |   |   |   |   |   |
| JCVIGM_049252_20110307 |      | corrinoid/iron-sulfur protein, small subunit                              |  |   |  |   |  |   |  |   |   |  |   |   |   |   |   |
| JCVIGM_022873_20110307 | cysK | cysteine synthase A                                                       |  |   |  |   |  |   |  |   |   |  |   |   |   |   |   |
| JCVIGM_307840_20110307 |      | dehydrogenase, FMN-dependent                                              |  |   |  |   |  |   |  |   |   |  |   |   |   |   |   |
| JCVIGM_102159_20110307 | deoC | deoxyribose-phosphate aldolase                                            |  | 3 |  |   |  | 2 |  | 1 | 1 |  |   | 2 |   |   | 1 |
| JCVIGM_056340_20110307 |      | diaminopimelate dehydrogenase                                             |  |   |  |   |  |   |  |   |   |  |   |   |   |   |   |
| JCVIGM_104884_20110307 |      | diaminopimelate dehydrogenase                                             |  |   |  |   |  |   |  |   | 1 |  |   |   |   |   | 1 |
| JCVIGM_002401_20110307 | lpdA | dihydrolipoyl dehydrogenase                                               |  |   |  |   |  |   |  |   |   |  |   |   |   |   |   |
| JCVIGM_139913_20110307 | pyrD | dihydroorotate oxidase                                                    |  | 1 |  |   |  |   |  | 1 | 1 |  |   |   |   |   | 1 |

|                        |       |                                                                   |   |  |   |   |   |   |   |   |   |   |   |   |   |   |   |   |   |   |   |   |
|------------------------|-------|-------------------------------------------------------------------|---|--|---|---|---|---|---|---|---|---|---|---|---|---|---|---|---|---|---|---|
| JCVIGM_049254_20110307 |       | dihydropteroate synthase, DHPS                                    | 1 |  |   |   |   |   |   |   |   |   |   |   |   |   |   |   |   |   |   |   |
| JCVIGM_130560_20110307 | ilvD  | dihydroxy-acid dehydratase                                        |   |  |   |   |   |   |   |   |   |   |   |   |   |   |   |   |   |   |   |   |
| JCVIGM_377265_20110307 | disA  | DNA integrity scanning protein disA                               |   |  |   |   |   |   |   |   |   |   |   |   |   |   |   |   |   |   |   |   |
| JCVIGM_176486_20110307 | dnaN  | DNA polymerase III, beta subunit                                  |   |  |   |   |   |   |   | 1 |   |   |   |   |   |   |   |   |   |   |   |   |
| JCVIGM_228057_20110307 | etfB  | electron transfer flavoprotein, alpha subunit                     |   |  |   |   |   |   |   |   |   |   |   |   |   |   |   |   |   |   |   |   |
| JCVIGM_310193_20110307 | etfB  | electron transfer flavoprotein, alpha subunit                     |   |  |   |   |   |   |   |   |   |   |   |   |   |   |   |   |   |   |   |   |
| JCVIGM_316234_20110307 | etfA  | electron transfer flavoprotein, alpha subunit/fixB family protein |   |  |   |   |   |   |   |   |   |   |   |   |   | 1 |   |   |   |   |   |   |
| JCVIGM_083913_20110307 | etfB  | electron transfer flavoprotein, beta subunit                      | 2 |  |   | 1 | 1 | 1 |   | 3 | 1 |   |   |   |   |   |   |   |   |   |   |   |
| JCVIGM_215068_20110307 | etfB  | electron transfer flavoprotein, beta subunit                      |   |  |   |   |   |   |   |   | 1 |   |   |   |   |   |   |   |   |   |   |   |
| JCVIGM_316431_20110307 |       | electron transfer flavoprotein, beta subunit                      |   |  |   |   |   |   |   |   |   |   |   |   |   |   |   |   |   |   |   |   |
| JCVIGM_041452_20110307 | tuf   | elongation factor Tu (fragment)                                   |   |  |   |   |   |   |   |   |   |   |   |   |   |   |   |   |   |   |   |   |
| JCVIGM_148583_20110307 |       | elongation factor Tu (fragment)                                   |   |  |   |   |   |   |   |   |   |   |   |   |   |   |   |   |   |   |   |   |
| JCVIGM_209439_20110307 | tuf   | elongation factor Tu (fragment)                                   | 1 |  |   |   |   |   |   |   |   |   |   |   | 1 |   |   |   |   |   |   |   |
| JCVIGM_239217_20110307 | tuf1  | elongation factor Tu 1                                            |   |  |   |   |   |   |   |   |   |   |   |   |   |   |   |   |   |   |   |   |
| JCVIGM_045263_20110307 |       | extracellular solute-binding protein family 1                     |   |  |   | 1 | 1 | 1 | 1 | 1 | 2 | 1 |   |   |   |   |   |   |   |   |   |   |
| JCVIGM_088711_20110307 |       | extracellular solute-binding protein family 1                     | 1 |  |   |   |   |   |   |   |   |   |   |   |   |   |   |   |   |   |   |   |
| JCVIGM_096968_20110307 |       | extracellular solute-binding protein family 1                     |   |  |   | 1 |   |   |   |   |   |   |   |   |   |   |   |   |   |   |   |   |
| JCVIGM_108783_20110307 |       | extracellular solute-binding protein family 1                     | 1 |  |   |   |   |   |   |   |   |   |   |   |   |   |   |   |   |   |   |   |
| JCVIGM_212868_20110307 |       | extracellular solute-binding protein family 1                     |   |  |   |   |   |   |   |   |   |   |   |   |   |   |   |   |   |   |   |   |
| JCVIGM_275107_20110307 |       | extracellular solute-binding protein family 1                     |   |  |   |   |   |   |   |   |   |   |   |   |   |   |   |   |   |   |   |   |
| JCVIGM_291167_20110307 |       | extracellular solute-binding protein family 1                     | 1 |  |   | 1 | 1 | 1 | 2 |   | 1 | 1 |   |   |   |   |   |   |   |   |   |   |
| JCVIGM_192080_20110307 |       | extracellular solute-binding protein family 5                     |   |  |   |   |   |   |   |   |   |   |   |   |   |   |   |   |   |   |   |   |
| JCVIGM_259518_20110307 |       | ferritin 1                                                        |   |  |   |   |   |   |   |   |   |   |   |   |   |   |   |   |   |   |   |   |
| JCVIGM_308648_20110307 |       | fibronectin type III domain                                       |   |  |   |   |   |   |   |   |   |   |   |   |   |   |   |   |   |   |   |   |
| JCVIGM_400677_20110307 |       | fla1 flagellin                                                    |   |  |   |   |   | 1 |   |   |   |   |   |   | 1 |   |   |   |   |   |   |   |
| JCVIGM_423664_20110307 |       | fla1 flagellin (fragment)                                         |   |  |   |   |   |   |   |   |   |   |   |   |   |   |   |   |   |   |   |   |
| JCVIGM_430871_20110307 |       | fla3 flagellin                                                    | 4 |  |   | 3 | 3 | 4 |   | 2 | 2 | 4 |   |   |   |   |   |   | 1 | 2 |   |   |
| JCVIGM_416087_20110307 | flgE1 | flagellar hook protein flgE1                                      |   |  |   |   |   |   |   |   |   |   |   |   |   |   |   |   |   |   |   |   |
| JCVIGM_077354_20110307 |       | flagellin (fragment)                                              |   |  |   | 1 | 2 |   | 1 |   | 1 | 3 | 1 |   | 1 | 2 | 1 | 3 |   |   |   |   |
| JCVIGM_172838_20110307 |       | flagellin (fragment)                                              |   |  |   |   | 1 |   |   |   |   |   |   |   |   |   |   |   |   |   | 1 |   |
| JCVIGM_022208_20110307 |       | flagellin and related hook-associated proteins                    | 3 |  | 1 | 2 | 4 | 3 |   | 4 | 1 | 3 |   | 2 | 3 |   |   |   |   |   |   | 1 |











|                        |      |                                                                      |    |   |   |   |   |   |   |   |   |   |   |   |   |   |   |   |   |   |
|------------------------|------|----------------------------------------------------------------------|----|---|---|---|---|---|---|---|---|---|---|---|---|---|---|---|---|---|
| JCVIGM_159787_20110307 |      | glyceraldehyde 3-phosphate dehydrogenase, C-terminal domain          |    |   |   |   |   |   |   |   |   |   |   |   |   |   |   |   |   |   |
| JCVIGM_169660_20110307 |      | glyceraldehyde 3-phosphate dehydrogenase, C-terminal domain          |    |   |   |   |   |   |   |   |   |   |   |   |   |   |   |   |   |   |
| JCVIGM_170407_20110307 |      | glyceraldehyde 3-phosphate dehydrogenase, C-terminal domain          | 2  | 1 | 1 | 3 | 2 |   |   | 2 | 2 | 1 | 2 |   | 1 | 1 | 2 | 1 |   |   |
| JCVIGM_189194_20110307 |      | glyceraldehyde 3-phosphate dehydrogenase, C-terminal domain          | 4  |   | 2 | 2 | 3 | 2 | 1 | 2 | 1 |   | 1 |   | 1 | 1 |   |   |   |   |
| JCVIGM_224384_20110307 |      | glyceraldehyde 3-phosphate dehydrogenase, C-terminal domain          |    |   |   |   |   |   |   |   | 1 |   |   |   |   |   |   |   |   |   |
| JCVIGM_268659_20110307 |      | glyceraldehyde 3-phosphate dehydrogenase, C-terminal domain          |    |   |   |   |   |   |   | 1 |   |   |   |   |   |   |   |   |   |   |
| JCVIGM_313872_20110307 |      | glyceraldehyde 3-phosphate dehydrogenase, C-terminal domain          |    |   |   |   |   |   |   |   |   |   |   |   |   |   |   |   |   |   |
| JCVIGM_319196_20110307 |      | glyceraldehyde 3-phosphate dehydrogenase, C-terminal domain          | 1  |   |   |   | 1 |   |   |   | 1 |   |   |   |   |   |   |   |   |   |
| JCVIGM_360253_20110307 |      | glyceraldehyde 3-phosphate dehydrogenase, C-terminal domain          |    |   |   |   |   |   |   |   |   |   |   |   |   | 1 |   |   |   |   |
| JCVIGM_100377_20110307 | gap  | glyceraldehyde-3-phosphate dehydrogenase, type I                     | 1  | 1 | 1 |   | 1 | 3 |   | 4 | 1 | 1 | 1 |   |   |   |   |   | 1 |   |
| JCVIGM_294702_20110307 | pduC | glycerol dehydratase large subunit                                   |    |   |   | 2 | 1 | 2 |   |   | 2 |   |   |   |   |   |   |   |   |   |
| JCVIGM_338330_20110307 |      | glycerol dehydrogenase and related enzymes                           |    |   |   |   |   |   |   |   |   |   | 1 |   |   |   |   |   |   |   |
| JCVIGM_213371_20110307 | glyA | glycine hydroxymethyltransferase                                     |    |   |   | 1 |   |   |   |   |   |   |   |   |   |   |   |   |   |   |
| JCVIGM_015371_20110307 |      | histidine kinase                                                     |    |   |   |   |   |   |   |   |   |   |   |   |   |   |   |   |   |   |
| JCVIGM_369000_20110307 |      | hydrogenase, Fe-only                                                 |    |   |   | 1 |   | 1 |   |   |   |   |   |   |   |   |   |   |   |   |
| JCVIGM_048518_20110307 |      | hydrolyase, tartrate beta subunit/fumarate domain protein, Fe-S type |    |   |   |   |   |   |   |   |   |   |   |   |   |   |   |   | 1 |   |
| JCVIGM_000577_20110307 |      | hypothetical protein                                                 |    |   |   |   |   |   |   |   |   |   |   |   |   |   |   |   |   |   |
| JCVIGM_001656_20110307 |      | hypothetical protein                                                 | 2  |   |   | 1 |   | 1 |   |   |   |   |   |   |   |   |   |   |   |   |
| JCVIGM_004031_20110307 |      | hypothetical protein                                                 |    |   | 1 |   |   |   |   |   |   |   | 1 |   |   |   |   |   |   | 1 |
| JCVIGM_006083_20110307 |      | hypothetical protein                                                 |    |   |   |   |   |   |   |   |   |   |   |   |   |   |   |   |   |   |
| JCVIGM_006988_20110307 |      | hypothetical protein                                                 | 1  |   |   |   |   |   |   |   |   |   |   |   |   |   |   |   |   |   |
| JCVIGM_007410_20110307 |      | hypothetical protein                                                 | 2  |   |   |   |   |   |   | 2 | 1 |   |   |   |   |   |   |   |   |   |
| JCVIGM_009250_20110307 |      | hypothetical protein                                                 |    |   |   |   |   |   |   |   |   |   |   |   |   |   |   |   |   |   |
| JCVIGM_010628_20110307 |      | hypothetical protein                                                 | 1  |   |   | 2 |   |   |   | 2 |   |   |   |   |   |   |   |   |   | 1 |
| JCVIGM_011271_20110307 |      | hypothetical protein                                                 |    |   |   |   | 2 |   |   | 1 | 1 |   |   |   |   |   |   |   |   |   |
| JCVIGM_011336_20110307 |      | hypothetical protein                                                 |    |   |   |   |   |   |   |   |   |   |   |   |   |   |   |   |   |   |
| JCVIGM_012967_20110307 |      | hypothetical protein                                                 |    |   |   | 1 |   | 1 | 1 |   |   |   |   |   |   |   |   |   |   |   |
| JCVIGM_014024_20110307 |      | hypothetical protein                                                 |    |   |   |   | 1 | 2 |   |   |   |   |   |   |   |   |   |   |   | 1 |
| JCVIGM_018751_20110307 |      | hypothetical protein                                                 |    |   |   |   |   |   |   |   |   |   |   |   |   |   |   |   |   |   |
| JCVIGM_020128_20110307 |      | hypothetical protein                                                 | 1  |   |   |   |   | 1 |   |   |   |   |   |   |   |   |   |   |   |   |
| JCVIGM_021326_20110307 |      | hypothetical protein                                                 | 13 | 2 | 1 | 3 | 5 | 6 | 2 | 2 | 4 | 2 | 3 | 1 | 2 | 2 | 1 |   |   |   |



|                        |                      |  |  |   |   |   |   |   |   |   |   |   |   |   |   |   |   |   |   |
|------------------------|----------------------|--|--|---|---|---|---|---|---|---|---|---|---|---|---|---|---|---|---|
| JCVIGM_060468_20110307 | hypothetical protein |  |  | 1 |   |   | 1 | 1 |   |   |   |   |   |   |   |   |   |   |   |
| JCVIGM_060720_20110307 | hypothetical protein |  |  | 2 |   |   |   |   |   |   |   |   |   |   |   |   |   |   |   |
| JCVIGM_061313_20110307 | hypothetical protein |  |  |   |   |   |   |   |   |   |   |   |   |   |   |   |   |   |   |
| JCVIGM_061338_20110307 | hypothetical protein |  |  |   |   |   | 2 |   |   | 2 | 1 |   |   |   | 1 |   | 1 |   |   |
| JCVIGM_063878_20110307 | hypothetical protein |  |  |   |   |   |   |   |   |   |   |   |   |   |   |   |   |   |   |
| JCVIGM_065213_20110307 | hypothetical protein |  |  |   |   |   |   |   |   |   |   |   |   |   |   |   |   |   |   |
| JCVIGM_068011_20110307 | hypothetical protein |  |  |   |   |   | 1 |   |   |   |   |   |   | 1 |   |   |   |   |   |
| JCVIGM_068020_20110307 | hypothetical protein |  |  |   |   |   |   |   |   |   |   |   |   |   |   |   |   |   |   |
| JCVIGM_070048_20110307 | hypothetical protein |  |  | 1 |   |   |   |   |   |   |   |   |   |   |   |   |   |   |   |
| JCVIGM_070908_20110307 | hypothetical protein |  |  |   |   |   |   |   |   |   |   |   |   |   |   |   |   |   |   |
| JCVIGM_071303_20110307 | hypothetical protein |  |  |   |   |   |   |   |   |   |   |   |   |   |   |   |   |   |   |
| JCVIGM_071361_20110307 | hypothetical protein |  |  |   |   |   |   |   |   |   | 1 |   |   |   |   |   |   |   |   |
| JCVIGM_071586_20110307 | hypothetical protein |  |  | 2 |   |   | 1 |   |   |   |   |   | 1 | 1 |   |   | 1 |   |   |
| JCVIGM_071718_20110307 | hypothetical protein |  |  |   |   |   |   |   |   |   |   |   |   |   |   |   |   |   |   |
| JCVIGM_072139_20110307 | hypothetical protein |  |  |   |   |   |   |   |   |   |   |   |   |   |   |   |   | 1 |   |
| JCVIGM_072463_20110307 | hypothetical protein |  |  |   |   |   |   |   |   |   |   |   |   |   |   |   |   |   |   |
| JCVIGM_073483_20110307 | hypothetical protein |  |  |   |   |   | 1 |   |   |   |   |   |   |   |   |   |   |   |   |
| JCVIGM_074339_20110307 | hypothetical protein |  |  | 3 |   |   |   | 2 |   |   | 1 | 1 |   |   |   |   |   | 1 |   |
| JCVIGM_074623_20110307 | hypothetical protein |  |  |   |   |   |   |   |   |   |   |   |   |   |   |   |   |   |   |
| JCVIGM_075200_20110307 | hypothetical protein |  |  | 3 |   |   |   |   |   |   |   |   |   |   |   |   |   |   |   |
| JCVIGM_077653_20110307 | hypothetical protein |  |  | 2 |   |   | 1 |   |   |   |   | 1 |   |   |   |   |   |   |   |
| JCVIGM_081664_20110307 | hypothetical protein |  |  |   |   |   |   |   |   |   |   |   |   |   |   |   |   |   |   |
| JCVIGM_083533_20110307 | hypothetical protein |  |  | 3 | 1 | 1 | 3 |   | 1 | 2 | 3 | 3 |   |   | 1 |   | 2 | 1 | 1 |
| JCVIGM_084534_20110307 | hypothetical protein |  |  |   |   |   |   |   |   |   |   |   |   |   |   |   |   |   |   |
| JCVIGM_084535_20110307 | hypothetical protein |  |  | 1 | 1 | 1 | 1 |   | 1 | 2 |   |   |   |   |   |   |   |   |   |
| JCVIGM_088087_20110307 | hypothetical protein |  |  |   |   |   |   |   |   |   |   |   |   |   |   |   |   |   |   |
| JCVIGM_088594_20110307 | hypothetical protein |  |  | 1 |   |   | 2 | 1 | 1 |   | 1 | 4 |   | 1 |   |   |   | 2 |   |
| JCVIGM_090261_20110307 | hypothetical protein |  |  |   |   |   |   | 1 |   |   | 1 | 1 | 1 |   |   | 1 |   | 1 |   |
| JCVIGM_090262_20110307 | hypothetical protein |  |  |   |   |   |   |   |   |   | 1 | 1 |   |   |   |   |   |   | 1 |



|                        |                      |  |   |   |   |   |   |   |   |  |  |   |   |   |   |   |  |  |   |   |
|------------------------|----------------------|--|---|---|---|---|---|---|---|--|--|---|---|---|---|---|--|--|---|---|
| JCVIGM_126576_20110307 | hypothetical protein |  |   |   |   | 1 |   |   |   |  |  |   |   |   | 1 |   |  |  |   |   |
| JCVIGM_128170_20110307 | hypothetical protein |  |   |   |   |   |   |   |   |  |  |   |   |   | 1 |   |  |  |   | 1 |
| JCVIGM_128306_20110307 | hypothetical protein |  | 5 |   |   |   |   |   |   |  |  |   |   |   |   |   |  |  |   |   |
| JCVIGM_129017_20110307 | hypothetical protein |  |   |   |   |   |   |   |   |  |  |   | 1 | 1 |   |   |  |  |   |   |
| JCVIGM_129660_20110307 | hypothetical protein |  |   |   |   |   |   |   |   |  |  |   |   |   |   |   |  |  |   |   |
| JCVIGM_130216_20110307 | hypothetical protein |  | 1 |   |   |   |   |   |   |  |  |   |   |   |   |   |  |  |   |   |
| JCVIGM_132903_20110307 | hypothetical protein |  | 4 |   | 2 | 6 | 7 | 5 |   |  |  | 3 | 5 | 1 |   |   |  |  | 2 |   |
| JCVIGM_133803_20110307 | hypothetical protein |  |   |   |   |   |   |   |   |  |  |   |   |   |   |   |  |  |   | 1 |
| JCVIGM_134883_20110307 | hypothetical protein |  |   |   |   |   | 1 |   |   |  |  |   | 1 |   |   |   |  |  |   |   |
| JCVIGM_135963_20110307 | hypothetical protein |  |   |   |   |   |   |   |   |  |  |   |   |   |   |   |  |  |   |   |
| JCVIGM_141001_20110307 | hypothetical protein |  |   |   |   |   | 1 | 1 |   |  |  |   | 1 |   |   |   |  |  |   | 2 |
| JCVIGM_141853_20110307 | hypothetical protein |  | 2 |   |   | 2 | 3 | 1 |   |  |  | 3 | 2 |   |   |   |  |  |   |   |
| JCVIGM_142860_20110307 | hypothetical protein |  |   |   |   |   |   |   |   |  |  |   | 1 |   |   |   |  |  |   | 1 |
| JCVIGM_144970_20110307 | hypothetical protein |  |   |   |   |   |   |   |   |  |  |   |   |   |   |   |  |  |   |   |
| JCVIGM_147926_20110307 | hypothetical protein |  | 1 |   |   | 1 | 4 | 3 |   |  |  | 3 | 3 | 1 |   |   |  |  |   | 2 |
| JCVIGM_148595_20110307 | hypothetical protein |  |   |   |   |   | 2 |   |   |  |  |   | 1 |   |   |   |  |  |   |   |
| JCVIGM_148602_20110307 | hypothetical protein |  |   |   |   |   |   |   |   |  |  |   |   |   |   |   |  |  |   |   |
| JCVIGM_148969_20110307 | hypothetical protein |  |   |   |   | 1 |   |   |   |  |  |   | 1 | 1 |   |   |  |  |   | 1 |
| JCVIGM_150315_20110307 | hypothetical protein |  |   |   |   |   |   |   |   |  |  |   |   |   |   |   |  |  |   |   |
| JCVIGM_150334_20110307 | hypothetical protein |  |   |   |   |   |   |   |   |  |  |   |   |   |   |   |  |  |   |   |
| JCVIGM_150335_20110307 | hypothetical protein |  | 1 |   |   | 2 | 2 | 3 | 1 |  |  | 2 | 1 |   | 2 |   |  |  |   | 1 |
| JCVIGM_153727_20110307 | hypothetical protein |  | 1 |   |   |   | 2 | 1 |   |  |  | 1 |   |   |   |   |  |  |   | 1 |
| JCVIGM_155277_20110307 | hypothetical protein |  |   |   |   |   |   |   |   |  |  |   |   |   |   |   |  |  |   |   |
| JCVIGM_156043_20110307 | hypothetical protein |  | 1 |   |   |   |   |   |   |  |  |   | 1 |   |   |   |  |  |   |   |
| JCVIGM_160972_20110307 | hypothetical protein |  |   |   |   |   |   |   |   |  |  |   |   |   |   |   |  |  |   |   |
| JCVIGM_161538_20110307 | hypothetical protein |  |   |   |   |   |   |   |   |  |  |   |   |   |   |   |  |  |   |   |
| JCVIGM_161966_20110307 | hypothetical protein |  |   |   |   |   |   |   |   |  |  |   |   |   |   |   |  |  |   |   |
| JCVIGM_163002_20110307 | hypothetical protein |  |   |   |   |   |   |   |   |  |  |   |   |   |   |   |  |  |   |   |
| JCVIGM_166279_20110307 | hypothetical protein |  |   |   |   |   |   | 1 |   |  |  |   |   |   |   |   |  |  |   |   |
| JCVIGM_169083_20110307 | hypothetical protein |  |   |   |   |   | 1 |   |   |  |  |   |   |   |   |   |  |  |   |   |
| JCVIGM_170674_20110307 | hypothetical protein |  | 1 | 1 |   |   | 1 |   |   |  |  | 2 |   |   | 2 |   |  |  |   | 1 |
| JCVIGM_173056_20110307 | hypothetical protein |  | 1 |   |   |   |   |   |   |  |  |   | 1 |   |   |   |  |  |   |   |
| JCVIGM_173583_20110307 | hypothetical protein |  |   |   |   |   |   |   |   |  |  |   |   |   |   |   |  |  |   |   |
| JCVIGM_175085_20110307 | hypothetical protein |  | 2 |   |   | 1 | 2 | 3 | 3 |  |  |   | 1 | 1 |   | 1 |  |  |   | 2 |





|                        |                      |  |   |   |   |   |   |   |   |   |   |   |   |   |  |  |   |   |
|------------------------|----------------------|--|---|---|---|---|---|---|---|---|---|---|---|---|--|--|---|---|
| JCVIGM_295523_20110307 | hypothetical protein |  |   |   |   |   | 3 | 3 |   | 4 | 3 |   |   |   |  |  | 1 |   |
| JCVIGM_296216_20110307 | hypothetical protein |  | 6 |   |   | 2 | 3 | 1 |   | 3 | 2 | 2 | 1 | 1 |  |  | 6 | 2 |
| JCVIGM_298432_20110307 | hypothetical protein |  |   |   |   |   |   |   |   |   |   |   |   |   |  |  |   |   |
| JCVIGM_298496_20110307 | hypothetical protein |  |   |   |   |   |   |   |   |   |   |   |   |   |  |  |   |   |
| JCVIGM_301982_20110307 | hypothetical protein |  |   |   |   |   |   |   |   |   |   |   |   |   |  |  |   |   |
| JCVIGM_302456_20110307 | hypothetical protein |  |   |   |   |   | 1 | 1 |   |   | 1 |   |   |   |  |  | 1 |   |
| JCVIGM_303429_20110307 | hypothetical protein |  |   |   |   |   |   |   |   |   |   |   |   |   |  |  |   |   |
| JCVIGM_303566_20110307 | hypothetical protein |  |   |   |   |   |   |   |   |   |   |   |   |   |  |  |   |   |
| JCVIGM_303609_20110307 | hypothetical protein |  | 1 |   |   |   |   |   |   | 1 |   |   |   |   |  |  |   |   |
| JCVIGM_303798_20110307 | hypothetical protein |  |   |   |   | 1 | 1 | 1 |   | 2 |   | 1 |   |   |  |  |   |   |
| JCVIGM_306883_20110307 | hypothetical protein |  |   |   |   |   |   |   |   |   |   |   |   |   |  |  |   |   |
| JCVIGM_306884_20110307 | hypothetical protein |  | 1 |   |   |   | 1 |   |   |   | 2 |   |   |   |  |  |   |   |
| JCVIGM_307057_20110307 | hypothetical protein |  |   |   |   |   |   | 2 |   |   |   |   |   |   |  |  |   |   |
| JCVIGM_307436_20110307 | hypothetical protein |  | 1 |   |   |   | 1 |   |   | 1 | 1 |   |   |   |  |  | 1 |   |
| JCVIGM_307765_20110307 | hypothetical protein |  |   |   |   | 1 | 2 | 1 |   | 1 |   |   |   |   |  |  |   |   |
| JCVIGM_309808_20110307 | hypothetical protein |  | 1 | 1 | 1 | 1 | 1 | 1 | 1 |   | 1 |   | 1 |   |  |  | 1 |   |
| JCVIGM_310529_20110307 | hypothetical protein |  |   |   |   |   |   |   |   |   |   |   |   |   |  |  |   |   |
| JCVIGM_313684_20110307 | hypothetical protein |  |   |   |   |   |   |   |   |   |   |   |   |   |  |  |   |   |
| JCVIGM_314099_20110307 | hypothetical protein |  |   |   |   | 1 |   |   |   |   |   |   |   |   |  |  |   |   |
| JCVIGM_314549_20110307 | hypothetical protein |  | 2 |   |   | 1 | 1 | 1 | 2 | 2 |   | 1 | 1 |   |  |  | 1 |   |
| JCVIGM_319934_20110307 | hypothetical protein |  |   |   |   |   |   |   |   | 1 | 1 |   |   |   |  |  |   |   |
| JCVIGM_322352_20110307 | hypothetical protein |  |   |   |   |   |   |   |   |   |   |   |   |   |  |  |   |   |
| JCVIGM_323810_20110307 | hypothetical protein |  |   |   |   |   |   |   |   |   |   |   |   |   |  |  |   |   |
| JCVIGM_327403_20110307 | hypothetical protein |  |   |   |   | 1 |   |   |   |   | 1 |   |   |   |  |  |   |   |
| JCVIGM_328614_20110307 | hypothetical protein |  |   |   |   |   |   |   |   |   |   |   |   |   |  |  |   |   |
| JCVIGM_332056_20110307 | hypothetical protein |  |   |   |   |   |   |   |   |   | 1 |   |   |   |  |  |   |   |
| JCVIGM_332688_20110307 | hypothetical protein |  |   | 1 |   | 1 |   |   |   | 1 | 1 |   |   |   |  |  | 1 |   |
| JCVIGM_333745_20110307 | hypothetical protein |  | 1 | 1 |   |   | 1 |   |   |   | 1 | 1 |   |   |  |  |   |   |









|                        |      |                                                     |   |  |   |   |   |   |   |   |   |   |   |   |   |   |   |  |   |   |
|------------------------|------|-----------------------------------------------------|---|--|---|---|---|---|---|---|---|---|---|---|---|---|---|--|---|---|
| JCVIGM_177219_20110307 |      | L-fucose isomerase and related proteins             |   |  |   |   |   | 1 |   |   |   |   |   |   |   |   |   |  |   |   |
| JCVIGM_022476_20110307 | fucl | L-fucose isomerase, C-terminal domain               |   |  |   |   |   |   |   |   |   |   |   |   |   |   |   |  |   |   |
| JCVIGM_059070_20110307 |      | L-fucose isomerase, C-terminal domain               | 1 |  |   |   |   |   |   |   |   |   |   |   |   |   |   |  |   |   |
| JCVIGM_066045_20110307 |      | L-fucose isomerase, C-terminal domain               | 1 |  |   | 1 | 1 |   |   |   |   |   |   |   |   |   |   |  |   |   |
| JCVIGM_101032_20110307 |      | L-fucose isomerase, C-terminal domain               | 2 |  | 1 |   |   |   |   | 1 |   |   |   |   |   |   |   |  |   | 1 |
| JCVIGM_106686_20110307 |      | L-fucose isomerase, C-terminal domain               | 1 |  |   |   |   |   |   |   |   | 1 |   |   |   |   |   |  |   | 2 |
| JCVIGM_124735_20110307 |      | L-fucose isomerase, C-terminal domain               |   |  |   |   |   |   |   |   |   |   |   |   |   |   |   |  |   |   |
| JCVIGM_187352_20110307 |      | L-fucose isomerase, C-terminal domain               | 1 |  |   | 2 | 1 |   |   | 1 | 2 |   |   |   |   |   |   |  |   |   |
| JCVIGM_278994_20110307 |      | L-fucose isomerase, C-terminal domain               |   |  |   |   |   |   |   |   |   |   |   |   |   |   |   |  |   |   |
| JCVIGM_325641_20110307 |      | L-fucose isomerase-like protein                     |   |  |   |   |   |   |   |   |   |   |   |   |   |   |   |  |   |   |
| JCVIGM_171365_20110307 |      | lipoprotein                                         |   |  |   |   |   |   |   |   |   |   |   |   |   |   |   |  |   |   |
| JCVIGM_083497_20110307 | ldh  | L-lactate dehydrogenase                             |   |  |   |   |   |   | 1 |   | 1 | 1 |   |   |   |   |   |  |   |   |
| JCVIGM_159477_20110307 | dapL | LL-diaminopimelate aminotransferase                 |   |  |   |   |   |   |   |   |   |   |   |   |   |   |   |  |   |   |
| JCVIGM_130368_20110307 |      | L-ribulose-5-phosphate 4-epimerase                  |   |  |   |   |   |   |   | 1 |   |   |   |   |   |   |   |  |   | 1 |
| JCVIGM_060255_20110307 | araD | L-ribulose-5-phosphate 4-epimerase araD             | 1 |  |   |   | 1 |   |   |   |   |   |   |   |   |   |   |  |   | 1 |
| JCVIGM_160693_20110307 | araD | L-ribulose-5-phosphate 4-epimerase araD             |   |  |   |   |   |   |   |   |   |   |   |   |   |   |   |  |   |   |
| JCVIGM_295794_20110307 | araD | L-ribulose-5-phosphate 4-epimerase araD             |   |  |   |   |   |   |   |   | 2 |   |   |   |   |   |   |  |   |   |
| JCVIGM_000243_20110307 | lysS | lysine--tRNA ligase                                 |   |  |   |   |   |   |   |   |   |   |   |   |   |   |   |  |   |   |
| JCVIGM_161438_20110307 |      | M18 family aminopeptidase                           |   |  |   |   |   |   |   |   |   |   |   |   |   |   |   |  |   |   |
| JCVIGM_203664_20110307 |      | M18 family aminopeptidase                           |   |  |   |   |   |   |   |   |   |   |   |   |   |   |   |  |   |   |
| JCVIGM_229762_20110307 |      | major outer membrane lipoprotein 1                  |   |  |   |   |   |   |   |   |   | 2 | 6 | 2 | 5 | 5 |   |  |   |   |
| JCVIGM_006253_20110307 | mdh  | malate dehydrogenase                                |   |  |   |   |   |   |   |   |   |   |   |   |   |   |   |  |   |   |
| JCVIGM_012327_20110307 | mdh  | malate dehydrogenase                                | 1 |  | 1 | 1 |   |   |   | 2 |   | 1 |   |   |   |   |   |  | 1 | 1 |
| JCVIGM_017662_20110307 |      | malate dehydrogenase                                |   |  |   |   |   |   |   |   |   |   |   |   |   |   |   |  |   |   |
| JCVIGM_026640_20110307 | mdh  | malate dehydrogenase                                |   |  |   |   |   |   |   |   |   |   |   |   |   |   |   |  |   |   |
| JCVIGM_028360_20110307 | mdh  | malate dehydrogenase                                | 3 |  | 1 | 1 |   |   |   | 2 | 2 |   |   |   |   |   |   |  |   | 2 |
| JCVIGM_127124_20110307 | mdh  | malate dehydrogenase                                |   |  |   |   |   |   |   |   |   |   |   |   |   |   |   |  |   | 2 |
| JCVIGM_229225_20110307 | mdh  | malate dehydrogenase                                |   |  |   |   |   |   |   |   |   |   |   |   |   |   |   |  |   |   |
| JCVIGM_079110_20110307 |      | malate dehydrogenase (oxaloacetate-decarboxylating) |   |  |   | 1 |   |   |   |   |   |   |   |   |   |   |   |  |   |   |
| JCVIGM_020629_20110307 | mdh  | malate dehydrogenase, NAD-dependent                 | 1 |  |   |   |   |   |   |   |   |   |   |   |   |   | 1 |  |   | 1 |



|                        |      |                                                            |  |  |  |   |  |    |    |   |   |   |   |   |   |   |   |   |   |   |
|------------------------|------|------------------------------------------------------------|--|--|--|---|--|----|----|---|---|---|---|---|---|---|---|---|---|---|
| JCVIGM_287642_20110307 |      | oligopeptide-binding protein OppA                          |  |  |  |   |  | 1  | 1  |   |   |   |   |   |   |   |   |   |   |   |
| JCVIGM_291730_20110307 |      | oligopeptide-binding protein OppA                          |  |  |  |   |  |    |    |   |   |   |   |   |   |   |   |   |   |   |
| JCVIGM_320377_20110307 |      | oligopeptide-binding protein OppA                          |  |  |  |   |  |    |    |   |   |   | 1 |   |   |   |   |   |   |   |
| JCVIGM_030295_20110307 |      | ompA family protein                                        |  |  |  |   |  |    |    |   |   |   |   | 1 |   |   |   | 1 |   |   |
| JCVIGM_021098_20110307 | pyrF | orotidine 5'-phosphate decarboxylase                       |  |  |  |   |  |    |    |   |   |   |   |   |   |   |   |   |   |   |
| JCVIGM_069275_20110307 |      | outer membrane protein                                     |  |  |  | 1 |  |    |    |   |   |   | 1 |   |   |   |   |   |   |   |
| JCVIGM_021757_20110307 |      | oxaloacetate decarboxylase, alpha subunit                  |  |  |  |   |  |    |    |   |   |   |   |   |   |   |   |   |   |   |
| JCVIGM_185159_20110307 |      | oxidoreductase domain protein                              |  |  |  |   |  |    |    |   |   |   |   |   |   |   |   |   |   |   |
| JCVIGM_227464_20110307 |      | oxidoreductase domain protein                              |  |  |  |   |  | 1  |    |   |   |   |   |   |   |   |   |   |   |   |
| JCVIGM_292816_20110307 |      | oxidoreductase domain protein                              |  |  |  |   |  |    |    |   |   |   |   |   |   |   |   |   |   |   |
| JCVIGM_098050_20110307 |      | peptide/nickel ABC transporter substrate-binding protein   |  |  |  |   |  |    |    |   |   |   |   |   |   |   |   |   |   |   |
| JCVIGM_051204_20110307 |      | peptidyl-prolyl cis-trans isomerase                        |  |  |  |   |  |    |    |   |   |   |   |   |   |   |   |   |   |   |
| JCVIGM_077390_20110307 |      | peptidyl-prolyl cis-trans isomerase                        |  |  |  |   |  |    |    |   |   |   |   |   |   |   |   |   |   |   |
| JCVIGM_089246_20110307 |      | peptidyl-prolyl cis-trans isomerase                        |  |  |  |   |  | 1  |    |   |   |   |   |   |   |   |   |   |   |   |
| JCVIGM_359878_20110307 |      | periplasmic binding protein/lacI transcriptional regulator |  |  |  |   |  |    |    |   |   |   |   |   |   |   |   |   |   |   |
| JCVIGM_330291_20110307 |      | periplasmic protein                                        |  |  |  |   |  | 1  |    | 1 | 1 |   |   | 2 | 4 |   |   |   |   |   |
| JCVIGM_352406_20110307 |      | periplasmic protein                                        |  |  |  |   |  | 5  | 1  |   | 2 | 2 | 3 | 2 | 2 | 3 | 1 |   | 3 |   |
| JCVIGM_063156_20110307 | pta  | phosphate acetyltransferase                                |  |  |  |   |  | 2  |    | 1 | 1 |   |   | 2 |   |   |   |   | 1 |   |
| JCVIGM_141522_20110307 | pta  | phosphate acetyltransferase                                |  |  |  |   |  | 1  |    | 1 |   | 1 |   | 2 | 2 |   |   |   |   |   |
| JCVIGM_008179_20110307 | pckA | phosphoenolpyruvate carboxykinase (ATP)                    |  |  |  |   |  | 3  |    | 1 | 2 | 1 | 5 |   | 2 | 1 | 1 |   | 2 |   |
| JCVIGM_042402_20110307 | pckA | phosphoenolpyruvate carboxykinase (ATP)                    |  |  |  |   |  |    |    |   |   | 1 |   | 1 | 1 |   |   |   |   |   |
| JCVIGM_051034_20110307 | pckA | phosphoenolpyruvate carboxykinase (ATP)                    |  |  |  |   |  |    |    |   |   |   |   |   |   |   |   | 1 |   |   |
| JCVIGM_066626_20110307 | pckA | phosphoenolpyruvate carboxykinase (ATP)                    |  |  |  |   |  | 4  | 1  |   | 4 |   | 1 |   | 2 | 3 | 2 | 1 | 1 | 4 |
| JCVIGM_070718_20110307 | pckA | phosphoenolpyruvate carboxykinase (ATP)                    |  |  |  |   |  | 19 | 2  | 2 | 2 | 3 | 3 | 5 | 2 | 7 | 2 | 3 | 2 | 5 |
| JCVIGM_084152_20110307 | pckA | phosphoenolpyruvate carboxykinase (ATP)                    |  |  |  |   |  |    |    |   |   |   |   |   |   |   |   |   |   |   |
| JCVIGM_094757_20110307 | pckA | phosphoenolpyruvate carboxykinase (ATP)                    |  |  |  |   |  |    |    |   |   |   |   |   |   |   |   |   |   |   |
| JCVIGM_108298_20110307 | pckA | phosphoenolpyruvate carboxykinase (ATP)                    |  |  |  |   |  |    |    |   | 1 | 1 |   |   |   |   |   |   |   |   |
| JCVIGM_111820_20110307 | pckA | phosphoenolpyruvate carboxykinase (ATP)                    |  |  |  |   |  |    |    | 1 |   |   |   |   |   |   |   |   |   |   |
| JCVIGM_116732_20110307 |      | phosphoenolpyruvate carboxykinase (ATP)                    |  |  |  |   |  | 1  |    | 5 | 2 | 1 | 1 | 1 | 1 | 1 | 2 | 1 | 1 |   |
| JCVIGM_126450_20110307 | pckA | phosphoenolpyruvate carboxykinase (ATP)                    |  |  |  |   |  |    | 37 |   | 1 | 1 |   |   | 1 |   | 1 |   |   |   |











|                        |      |                                                       |  |   |  |   |   |   |   |   |   |   |   |   |   |   |   |   |   |
|------------------------|------|-------------------------------------------------------|--|---|--|---|---|---|---|---|---|---|---|---|---|---|---|---|---|
| JCVIGM_198898_20110307 |      | pyruvate-formate lyase                                |  | 6 |  |   | 2 | 5 | 4 | 3 | 6 | 5 | 1 | 1 |   |   |   | 5 | 1 |
| JCVIGM_255194_20110307 |      | regulator of chromosome condensation, RCC1 (fragment) |  |   |  |   |   |   |   |   |   |   |   |   |   |   |   |   |   |
| JCVIGM_036971_20110307 | rplJ | ribosomal protein L10                                 |  | 2 |  |   |   |   |   |   |   |   |   |   |   |   |   |   |   |
| JCVIGM_042383_20110307 | rplJ | ribosomal protein L10                                 |  |   |  |   |   | 1 |   |   |   | 1 |   |   |   |   |   |   |   |
| JCVIGM_071597_20110307 | rplJ | ribosomal protein L10                                 |  | 1 |  |   | 2 | 1 | 2 |   | 1 | 1 | 1 |   |   |   | 1 |   |   |
| JCVIGM_092732_20110307 | rplJ | ribosomal protein L10                                 |  |   |  |   |   | 1 | 2 |   | 1 | 1 | 3 | 2 |   |   |   | 5 |   |
| JCVIGM_131224_20110307 | rplJ | ribosomal protein L10                                 |  |   |  |   |   |   |   |   |   |   |   |   |   |   |   |   |   |
| JCVIGM_210248_20110307 | rplJ | ribosomal protein L10                                 |  | 2 |  | 1 | 2 | 4 | 5 | 1 |   | 2 | 1 | 1 | 1 | 1 | 1 | 4 |   |
| JCVIGM_226856_20110307 | rplJ | ribosomal protein L10                                 |  |   |  |   |   |   |   |   |   |   | 2 | 2 | 2 |   |   | 2 |   |
| JCVIGM_082097_20110307 | rplK | ribosomal protein L11                                 |  |   |  |   |   |   | 1 |   |   |   |   |   |   |   |   |   |   |
| JCVIGM_084768_20110307 | rplK | ribosomal protein L11                                 |  |   |  |   |   |   | 1 |   |   |   |   |   |   |   |   |   |   |
| JCVIGM_136348_20110307 | rplK | ribosomal protein L11                                 |  |   |  |   |   |   |   |   |   | 1 |   |   |   |   |   |   |   |
| JCVIGM_257392_20110307 | rplK | ribosomal protein L11                                 |  |   |  |   |   |   |   |   |   |   |   |   |   |   |   |   |   |
| JCVIGM_077076_20110307 | rplK | ribosomal protein L11, N-terminal domain              |  | 3 |  |   |   | 1 | 3 |   |   | 2 |   |   |   |   |   | 1 |   |
| JCVIGM_097373_20110307 | rplK | ribosomal protein L11, N-terminal domain              |  |   |  |   |   |   |   |   |   |   |   |   |   |   |   |   |   |
| JCVIGM_045961_20110307 | rplB | ribosomal protein L2                                  |  | 1 |  | 1 |   | 1 |   |   | 1 |   |   |   |   |   |   |   |   |
| JCVIGM_119829_20110307 | rplB | ribosomal protein L2                                  |  |   |  |   |   |   |   |   |   |   |   |   |   |   |   |   |   |
| JCVIGM_193483_20110307 | rplB | ribosomal protein L2                                  |  |   |  |   |   |   |   |   |   |   |   |   |   |   |   |   |   |
| JCVIGM_159582_20110307 | rplW | ribosomal protein L23                                 |  |   |  |   |   |   |   |   |   |   |   |   |   |   |   |   |   |
| JCVIGM_006060_20110307 | rplL | ribosomal protein L7/L12                              |  |   |  |   |   |   |   |   |   |   |   |   |   |   |   |   |   |
| JCVIGM_054869_20110307 | rplL | ribosomal protein L7/L12                              |  |   |  |   |   |   |   |   |   |   |   |   |   |   |   |   |   |
| JCVIGM_156392_20110307 | rplL | ribosomal protein L7/L12                              |  |   |  |   | 1 | 2 |   |   |   |   |   |   |   |   |   |   |   |
| JCVIGM_159116_20110307 | rplL | ribosomal protein L7/L12                              |  | 3 |  |   |   |   |   |   |   | 1 |   |   |   |   |   |   |   |
| JCVIGM_163260_20110307 | rplL | ribosomal protein L7/L12                              |  |   |  |   |   |   |   |   |   |   |   |   |   |   |   |   |   |
| JCVIGM_327331_20110307 | rplL | ribosomal protein L7/L12                              |  |   |  |   |   |   |   |   |   |   |   |   |   |   |   |   |   |
| JCVIGM_274754_20110307 | rpsJ | ribosomal protein S10                                 |  |   |  | 1 |   |   | 1 |   |   |   |   |   |   |   |   |   |   |
| JCVIGM_021052_20110307 | rpsG | ribosomal protein S7                                  |  |   |  |   |   |   |   |   | 1 |   |   |   |   |   |   |   |   |
| JCVIGM_089527_20110307 | rpsH | ribosomal protein S8                                  |  | 1 |  |   | 2 |   | 1 |   |   | 2 |   |   |   |   |   |   |   |
| JCVIGM_106685_20110307 | rpsH | ribosomal protein S8                                  |  | 2 |  |   | 2 |   | 1 |   |   | 1 |   |   |   |   |   |   |   |
| JCVIGM_116015_20110307 | rpsH | ribosomal protein S8                                  |  |   |  |   |   |   |   |   |   |   |   |   |   |   |   |   |   |
| JCVIGM_158733_20110307 | rpsH | ribosomal protein S8                                  |  |   |  |   |   |   |   |   | 1 |   |   |   |   |   |   |   |   |





|                        |      |                                                                                         |  |   |   |   |   |   |   |   |   |   |   |  |  |  |   |   |
|------------------------|------|-----------------------------------------------------------------------------------------|--|---|---|---|---|---|---|---|---|---|---|--|--|--|---|---|
| JCVIGM_166526_20110307 | tufB | translation elongation factor Tu                                                        |  |   |   |   |   |   |   |   |   |   |   |  |  |  |   |   |
| JCVIGM_185454_20110307 | tuf  | translation elongation factor Tu                                                        |  |   |   |   |   |   |   | 1 |   |   |   |  |  |  |   |   |
| JCVIGM_196046_20110307 | tuf  | translation elongation factor Tu                                                        |  |   |   |   |   |   |   |   |   |   |   |  |  |  |   |   |
| JCVIGM_196200_20110307 | tuf  | translation elongation factor Tu                                                        |  | 2 |   | 1 |   |   |   |   |   |   |   |  |  |  |   |   |
| JCVIGM_205201_20110307 | tuf  | translation elongation factor Tu                                                        |  |   |   |   |   |   |   |   |   |   |   |  |  |  |   |   |
| JCVIGM_211136_20110307 | tuf  | translation elongation factor Tu                                                        |  |   |   |   |   |   |   |   |   |   |   |  |  |  |   |   |
| JCVIGM_237573_20110307 | tuf  | translation elongation factor Tu                                                        |  | 1 |   |   |   |   |   |   |   |   |   |  |  |  |   |   |
| JCVIGM_249773_20110307 | tuf  | translation elongation factor Tu                                                        |  |   |   |   |   |   |   |   |   |   |   |  |  |  |   |   |
| JCVIGM_250936_20110307 | tufB | translation elongation factor Tu                                                        |  |   |   |   |   |   |   |   |   | 1 |   |  |  |  | 1 |   |
| JCVIGM_300774_20110307 | tuf  | translation elongation factor Tu                                                        |  |   |   |   |   |   |   |   |   |   |   |  |  |  |   |   |
| JCVIGM_368873_20110307 | tuf  | translation elongation factor Tu                                                        |  |   |   |   |   |   |   |   |   |   |   |  |  |  |   |   |
| JCVIGM_385355_20110307 |      | transposase, IS111A/IS1328/IS1533                                                       |  | 2 |   |   |   |   |   |   |   |   |   |  |  |  |   |   |
| JCVIGM_364669_20110307 |      | TRAP transporter solute receptor, TAXI family                                           |  |   |   |   |   |   |   |   |   |   |   |  |  |  |   |   |
| JCVIGM_001774_20110307 | tpiA | triose-phosphate isomerase                                                              |  | 2 |   | 1 | 2 | 1 | 1 |   | 1 | 2 | 1 |  |  |  |   | 1 |
| JCVIGM_008332_20110307 | tpiA | triose-phosphate isomerase                                                              |  | 2 |   | 1 | 2 | 2 | 2 |   | 2 |   |   |  |  |  |   | 1 |
| JCVIGM_011008_20110307 | tpiA | triose-phosphate isomerase                                                              |  | 1 |   |   | 1 |   |   |   |   |   |   |  |  |  |   |   |
| JCVIGM_020800_20110307 | tpiA | triose-phosphate isomerase                                                              |  |   | 1 |   |   |   |   |   |   |   | 1 |  |  |  |   |   |
| JCVIGM_023613_20110307 | tpiA | triose-phosphate isomerase                                                              |  |   |   |   |   |   |   |   | 1 | 1 |   |  |  |  |   |   |
| JCVIGM_027321_20110307 | tpiA | triose-phosphate isomerase                                                              |  |   |   |   | 1 | 1 | 2 |   | 2 | 2 |   |  |  |  |   |   |
| JCVIGM_087250_20110307 | tpiA | triose-phosphate isomerase                                                              |  | 2 |   |   | 3 | 1 | 1 |   | 2 | 2 | 1 |  |  |  |   | 2 |
| JCVIGM_115071_20110307 | tpiA | triose-phosphate isomerase                                                              |  |   |   |   |   |   |   |   |   |   |   |  |  |  |   |   |
| JCVIGM_135680_20110307 | tpiA | triose-phosphate isomerase                                                              |  | 1 |   |   | 1 |   |   |   | 2 | 1 |   |  |  |  |   |   |
| JCVIGM_261662_20110307 | tpiA | triose-phosphate isomerase                                                              |  |   |   |   |   | 1 |   |   | 1 | 1 |   |  |  |  |   |   |
| JCVIGM_302433_20110307 | tpiA | triose-phosphate isomerase                                                              |  |   |   |   |   |   |   |   |   |   | 1 |  |  |  |   | 2 |
| JCVIGM_337367_20110307 | tpiA | triose-phosphate isomerase                                                              |  | 1 |   |   | 1 | 1 | 1 |   | 1 |   | 1 |  |  |  |   |   |
| JCVIGM_366477_20110307 | tpiA | triose-phosphate isomerase                                                              |  |   |   |   |   |   |   |   |   |   |   |  |  |  |   |   |
| JCVIGM_114128_20110307 |      | tRNA methyl transferase                                                                 |  |   |   |   |   |   |   |   |   |   |   |  |  |  |   |   |
| JCVIGM_117733_20110307 |      | two-component system sensor histidine kinase, with a response regulator receiver domain |  |   |   |   |   |   |   |   |   |   |   |  |  |  |   |   |
| JCVIGM_373409_20110307 |      | type III restriction protein                                                            |  |   |   |   |   |   |   |   |   |   | 1 |  |  |  |   |   |



|                        |      |                                                            |  |    |    |    |    |    |    |    |    |    |    |    |   |   |   |   |   |
|------------------------|------|------------------------------------------------------------|--|----|----|----|----|----|----|----|----|----|----|----|---|---|---|---|---|
| JCVIGM_024389_20110307 | rplK | 50S ribosomal protein L11                                  |  |    |    |    |    | 1  |    |    |    |    | 1  |    |   |   |   |   |   |
| JCVIGM_045877_20110307 | rplK | 50S ribosomal protein L11                                  |  | 1  | 2  |    |    |    |    | 2  | 2  | 1  | 2  | 1  | 1 | 1 | 2 |   |   |
| JCVIGM_059265_20110307 | rplK | 50S ribosomal protein L11                                  |  | 3  | 3  | 1  | 3  | 2  | 2  | 2  | 2  | 3  | 3  | 1  | 2 | 2 |   |   | 3 |
| JCVIGM_033470_20110307 | rplE | 50S ribosomal protein L5                                   |  |    |    | 1  |    | 1  |    |    |    |    |    |    |   |   |   |   | 1 |
| JCVIGM_155746_20110307 | rplE | 50S ribosomal protein L5                                   |  |    |    |    | 1  |    |    |    |    |    |    |    |   |   |   |   |   |
| JCVIGM_232804_20110307 | rplE | 50S ribosomal protein L5                                   |  |    |    |    | 1  |    |    |    |    |    |    |    |   |   |   |   |   |
| JCVIGM_020270_20110307 | rplL | 50S ribosomal protein L7/L12                               |  | 2  | 2  | 1  |    |    |    |    | 2  | 8  | 4  |    | 3 | 2 | 3 | 2 |   |
| JCVIGM_125249_20110307 | rplL | 50S ribosomal protein L7/L12                               |  | 2  | 3  | 1  |    | 3  |    | 3  |    | 5  |    |    |   |   |   |   |   |
| JCVIGM_100458_20110307 | ribH | 6,7-dimethyl-8-ribityllumazine synthase                    |  |    | 2  |    |    |    |    |    |    |    |    |    |   |   |   |   |   |
| JCVIGM_013177_20110307 |      | 60 kDa chaperonin                                          |  |    |    | 1  | 1  |    |    |    | 1  |    |    |    |   |   |   |   |   |
| JCVIGM_213822_20110307 |      | 60 kDa chaperonin                                          |  |    |    |    |    |    |    |    |    |    |    |    |   |   |   |   |   |
| JCVIGM_123049_20110307 |      | ABC transporter periplasmic-binding protein ytfQ           |  | 1  |    |    | 1  | 1  |    | 1  | 1  |    |    |    |   |   |   | 1 |   |
| JCVIGM_295655_20110307 |      | ABC transporter related                                    |  |    |    |    |    |    |    |    |    |    |    |    |   |   |   |   |   |
| JCVIGM_097008_20110307 |      | ABC transporter, ATP-binding protein                       |  | 1  |    |    |    |    |    |    |    |    |    |    | 1 |   |   |   |   |
| JCVIGM_168201_20110307 |      | ABC transporter, ATP-binding protein                       |  |    |    | 2  |    |    |    |    |    |    |    |    |   |   |   |   |   |
| JCVIGM_070783_20110307 |      | ABC transporter, permease protein                          |  |    |    |    |    |    |    |    | 2  |    |    |    |   |   |   |   |   |
| JCVIGM_179750_20110307 |      | ABC transporter, substrate-binding protein                 |  | 2  | 2  |    |    |    |    |    |    |    |    |    |   |   |   |   |   |
| JCVIGM_284177_20110307 |      | ABC transporter, substrate-binding protein, family 1       |  |    | 2  |    | 3  |    |    |    |    | 1  |    |    |   |   |   |   |   |
| JCVIGM_284885_20110307 |      | ABC-type dipeptide transport system, periplasmic component |  | 1  |    |    |    |    |    |    |    | 1  |    |    |   |   |   |   |   |
| JCVIGM_168588_20110307 |      | ABC-type sugar transport system, periplasmic component     |  |    | 2  | 1  | 3  | 1  |    |    | 2  |    |    |    |   |   |   |   |   |
| JCVIGM_297706_20110307 |      | ABC-type sugar transport system, periplasmic component     |  |    |    |    | 1  | 6  | 3  | 10 | 6  | 3  |    |    |   |   |   |   | 2 |
| JCVIGM_162628_20110307 |      | ABC-type transport system, substrate-binding component     |  |    |    |    | 1  | 1  | 1  |    |    |    |    |    |   |   |   |   | 1 |
| JCVIGM_197130_20110307 |      | ABC-type xylose transport system, periplasmic component    |  | 4  | 2  | 1  | 4  | 1  | 5  | 2  | 5  | 4  | 1  |    |   |   |   |   | 1 |
| JCVIGM_034585_20110307 | ackA | acetate kinase                                             |  | 1  |    |    | 1  | 2  | 1  |    | 1  | 1  | 1  |    |   |   |   |   |   |
| JCVIGM_090369_20110307 | ackA | acetate kinase                                             |  | 3  |    |    |    |    |    |    |    |    |    |    |   |   |   |   |   |
| JCVIGM_103872_20110307 | ackA | acetate kinase                                             |  |    |    |    |    | 1  |    |    |    |    |    |    |   |   |   |   |   |
| JCVIGM_105479_20110307 | ackA | acetate kinase                                             |  |    |    |    |    |    | 1  |    | 1  |    |    |    |   |   |   |   |   |
| JCVIGM_313779_20110307 | ackA | acetate kinase                                             |  |    |    |    | 1  | 1  |    |    |    | 1  |    |    |   |   |   |   |   |
| JCVIGM_120726_20110307 | ilvC | acetohydroxy acid isomeroreductase, catalytic domain       |  | 1  | 1  |    | 1  | 2  | 1  | 2  | 2  | 1  | 2  |    |   |   |   |   | 1 |
| JCVIGM_136868_20110307 | ilvC | acetohydroxy acid isomeroreductase, catalytic domain       |  | 12 | 13 | 15 | 15 | 14 | 15 | 14 | 13 | 12 | 12 | 10 | 1 | 5 | 3 | 5 | 4 |









|                        |      |                                                                   |  |   |   |   |   |   |   |   |   |   |   |   |   |   |   |   |   |   |
|------------------------|------|-------------------------------------------------------------------|--|---|---|---|---|---|---|---|---|---|---|---|---|---|---|---|---|---|
| JCVIGM_307840_20110307 |      | dehydrogenase, FMN-dependent                                      |  |   |   |   |   |   |   |   |   |   |   |   |   |   |   |   |   |   |
| JCVIGM_102159_20110307 | deoC | deoxyribose-phosphate aldolase                                    |  | 9 |   | 5 | 6 | 4 | 7 | 1 | 6 | 4 | 1 | 1 | 8 | 1 | 1 | 4 | 2 |   |
| JCVIGM_056340_20110307 |      | diaminopimelate dehydrogenase                                     |  | 3 |   |   | 2 |   |   |   |   |   |   | 1 | 1 |   |   |   | 1 |   |
| JCVIGM_104884_20110307 |      | diaminopimelate dehydrogenase                                     |  | 1 | 1 | 1 | 2 | 2 | 3 | 2 | 2 | 2 | 1 |   |   | 1 |   | 2 |   |   |
| JCVIGM_002401_20110307 | lpdA | dihydrolipoyl dehydrogenase                                       |  |   |   |   |   | 1 |   |   |   |   |   |   |   |   | 1 |   |   |   |
| JCVIGM_139913_20110307 | pyrD | dihydroorotate oxidase                                            |  | 1 |   |   | 1 | 1 | 2 | 1 | 2 | 1 |   |   |   |   |   |   |   |   |
| JCVIGM_049254_20110307 |      | dihydropteroate synthase, DHPS                                    |  | 7 | 2 |   |   |   |   |   |   |   | 2 |   |   |   |   |   |   |   |
| JCVIGM_130560_20110307 | ilvD | dihydroxy-acid dehydratase                                        |  |   |   |   |   |   | 1 |   | 1 |   |   |   |   |   |   |   |   |   |
| JCVIGM_377265_20110307 | disA | DNA integrity scanning protein disA                               |  | 2 |   |   | 1 |   |   |   | 1 | 1 |   |   |   |   |   |   |   | 2 |
| JCVIGM_176486_20110307 | dnaN | DNA polymerase III, beta subunit                                  |  |   |   |   |   |   |   |   |   |   |   |   |   |   |   |   |   |   |
| JCVIGM_228057_20110307 | etfB | electron transfer flavoprotein, alpha subunit                     |  |   |   | 2 |   | 2 | 3 |   |   |   |   |   |   |   |   |   |   |   |
| JCVIGM_310193_20110307 | etfB | electron transfer flavoprotein, alpha subunit                     |  | 1 |   |   |   |   | 1 |   | 2 | 1 |   |   |   |   |   |   |   |   |
| JCVIGM_316234_20110307 | etfA | electron transfer flavoprotein, alpha subunit/fixB family protein |  | 1 |   |   | 1 |   |   |   |   |   |   |   |   |   |   |   |   |   |
| JCVIGM_083913_20110307 | etfB | electron transfer flavoprotein, beta subunit                      |  | 7 | 1 |   | 1 | 4 | 4 | 2 | 4 | 2 |   |   |   |   |   |   |   |   |
| JCVIGM_215068_20110307 | etfB | electron transfer flavoprotein, beta subunit                      |  |   |   | 1 |   | 1 | 2 | 1 | 2 |   |   | 1 |   |   |   |   |   |   |
| JCVIGM_316431_20110307 |      | electron transfer flavoprotein, beta subunit                      |  | 3 | 1 | 5 | 1 |   | 4 |   | 2 |   |   |   |   |   |   |   |   |   |
| JCVIGM_041452_20110307 | tuf  | elongation factor Tu (fragment)                                   |  |   |   | 1 |   |   |   |   | 2 |   |   |   |   |   |   |   |   |   |
| JCVIGM_148583_20110307 |      | elongation factor Tu (fragment)                                   |  |   |   |   |   |   |   | 1 |   |   |   |   |   |   |   |   | 1 |   |
| JCVIGM_209439_20110307 | tuf  | elongation factor Tu (fragment)                                   |  | 1 |   |   | 1 |   | 1 | 1 |   | 1 |   |   | 1 | 1 | 1 |   | 1 | 1 |
| JCVIGM_239217_20110307 | tuf1 | elongation factor Tu 1                                            |  |   |   |   |   |   |   |   |   |   |   |   |   |   |   | 3 |   |   |
| JCVIGM_045263_20110307 |      | extracellular solute-binding protein family 1                     |  |   | 2 | 1 | 5 | 3 | 2 | 3 | 3 | 2 | 3 |   |   |   |   |   | 1 | 1 |
| JCVIGM_088711_20110307 |      | extracellular solute-binding protein family 1                     |  | 7 |   |   |   |   |   |   |   |   |   |   |   |   |   |   |   |   |
| JCVIGM_096968_20110307 |      | extracellular solute-binding protein family 1                     |  |   | 2 | 1 | 3 | 2 |   |   |   |   | 1 |   |   |   |   |   |   |   |
| JCVIGM_108783_20110307 |      | extracellular solute-binding protein family 1                     |  | 4 |   |   |   |   |   |   |   |   |   |   |   |   |   |   |   |   |
| JCVIGM_212868_20110307 |      | extracellular solute-binding protein family 1                     |  |   |   |   | 1 | 1 |   |   |   |   |   |   |   |   |   |   |   |   |
| JCVIGM_275107_20110307 |      | extracellular solute-binding protein family 1                     |  |   |   |   |   |   |   |   | 1 | 1 |   |   |   |   |   |   |   |   |
| JCVIGM_291167_20110307 |      | extracellular solute-binding protein family 1                     |  | 1 | 2 |   | 2 | 2 | 3 | 3 | 5 | 3 | 3 | 1 |   | 1 |   |   | 1 |   |
| JCVIGM_192080_20110307 |      | extracellular solute-binding protein family 5                     |  | 1 |   |   |   |   |   |   |   |   |   |   |   |   |   |   |   |   |
| JCVIGM_259518_20110307 |      | ferritin 1                                                        |  |   |   |   |   |   |   |   |   |   |   |   |   |   |   |   |   | 2 |
| JCVIGM_308648_20110307 |      | fibronectin type III domain                                       |  |   | 1 |   |   |   |   |   |   |   | 1 |   |   |   |   |   |   |   |
| JCVIGM_400677_20110307 |      | fla1 flagellin                                                    |  | 1 | 1 | 1 | 1 | 3 | 4 | 2 | 2 | 3 |   | 3 | 3 | 4 | 4 |   | 1 |   |





|                        |      |                                                                  |  |    |    |    |    |    |    |    |    |    |    |   |    |   |    |
|------------------------|------|------------------------------------------------------------------|--|----|----|----|----|----|----|----|----|----|----|---|----|---|----|
| JCVIGM_336730_20110307 |      | galactose ABC transporter, periplasmic galactose-binding protein |  | 1  | 1  |    | 2  | 2  | 1  |    | 2  | 2  | 3  |   |    |   | 1  |
| JCVIGM_027728_20110307 |      | galactose/glucose-binding lipoprotein                            |  |    |    |    |    |    |    |    |    |    |    |   |    |   |    |
| JCVIGM_266085_20110307 | galT | galactose-1-phosphate uridylyltransferase galT                   |  |    |    |    |    |    |    |    |    |    |    |   |    |   | 1  |
| JCVIGM_165424_20110307 |      | gliding motility-related protein                                 |  | 1  |    |    |    |    |    |    | 1  | 1  | 2  |   |    |   |    |
| JCVIGM_351864_20110307 |      | glu/leu/phe/val dehydrogenase, dimerization domain protein       |  |    |    |    |    |    |    |    | 1  |    | 1  |   |    |   |    |
| JCVIGM_138714_20110307 |      | gluconate 5-dehydrogenase                                        |  |    |    |    |    | 1  |    |    | 2  |    | 1  |   |    |   | 1  |
| JCVIGM_002867_20110307 | pgi  | glucose-6-phosphate isomerase                                    |  | 3  |    | 1  | 2  | 4  | 3  | 1  | 2  | 2  | 4  |   | 3  | 1 | 4  |
| JCVIGM_015397_20110307 | pgi  | glucose-6-phosphate isomerase                                    |  |    |    |    |    |    |    |    |    |    |    |   |    |   |    |
| JCVIGM_015745_20110307 | pgi  | glucose-6-phosphate isomerase                                    |  | 4  | 5  | 1  | 5  | 6  | 8  | 3  | 7  | 4  | 5  | 2 |    | 2 | 1  |
| JCVIGM_026127_20110307 | pgi  | glucose-6-phosphate isomerase                                    |  | 1  |    |    | 1  | 1  |    |    |    |    |    |   |    |   |    |
| JCVIGM_030449_20110307 | pgi  | glucose-6-phosphate isomerase                                    |  | 7  | 11 | 10 | 7  | 16 | 9  |    | 8  | 3  | 10 | 1 |    |   | 8  |
| JCVIGM_042043_20110307 | pgi  | glucose-6-phosphate isomerase                                    |  |    |    |    | 1  | 1  |    |    |    |    |    |   | 1  |   |    |
| JCVIGM_054834_20110307 | pgi  | glucose-6-phosphate isomerase                                    |  |    |    |    | 1  | 1  |    |    |    |    |    |   |    |   |    |
| JCVIGM_073687_20110307 | pgi  | glucose-6-phosphate isomerase                                    |  | 1  | 1  |    |    | 1  |    | 1  |    |    |    |   |    |   |    |
| JCVIGM_075891_20110307 | pgi  | glucose-6-phosphate isomerase                                    |  |    | 1  |    |    |    |    | 2  | 2  | 1  | 1  | 1 |    |   | 3  |
| JCVIGM_080716_20110307 | pgi  | glucose-6-phosphate isomerase                                    |  |    |    |    |    | 1  |    |    |    |    |    |   |    |   |    |
| JCVIGM_091996_20110307 | pgi  | glucose-6-phosphate isomerase                                    |  | 3  | 6  | 5  | 6  | 8  | 11 |    | 1  |    | 6  | 1 | 1  | 1 | 2  |
| JCVIGM_116144_20110307 | pgi  | glucose-6-phosphate isomerase                                    |  | 1  | 1  |    | 2  |    |    |    | 1  |    |    |   |    |   |    |
| JCVIGM_147397_20110307 | pgi  | glucose-6-phosphate isomerase                                    |  | 18 | 9  | 3  |    | 11 | 5  |    | 1  |    | 1  |   | 1  |   | 16 |
| JCVIGM_150388_20110307 | pgi  | glucose-6-phosphate isomerase                                    |  | 3  | 1  |    |    |    |    |    |    |    |    |   |    |   | 1  |
| JCVIGM_154594_20110307 | pgi  | glucose-6-phosphate isomerase                                    |  | 15 | 20 | 10 | 9  | 19 | 20 | 15 | 19 | 14 | 10 | 7 | 5  | 6 | 1  |
| JCVIGM_170286_20110307 | pgi  | glucose-6-phosphate isomerase                                    |  | 17 |    | 17 | 18 | 6  | 10 | 3  | 10 | 8  |    | 1 | 14 | 1 | 8  |
| JCVIGM_208717_20110307 | pgi  | glucose-6-phosphate isomerase                                    |  |    |    |    |    |    |    |    |    |    |    |   |    |   |    |
| JCVIGM_221773_20110307 | pgi  | glucose-6-phosphate isomerase                                    |  | 5  | 2  | 3  | 2  | 4  | 3  |    | 4  | 1  | 3  | 1 | 3  | 1 | 2  |
| JCVIGM_229071_20110307 |      | glucose-6-phosphate isomerase                                    |  | 5  | 4  | 15 | 8  | 17 | 15 | 4  | 11 | 8  | 6  | 4 | 4  | 4 | 1  |
| JCVIGM_245845_20110307 | pgi  | glucose-6-phosphate isomerase                                    |  |    |    |    |    |    |    |    | 1  |    |    |   |    |   | 1  |
| JCVIGM_257476_20110307 | pgi  | glucose-6-phosphate isomerase                                    |  | 4  | 2  | 1  | 1  | 1  | 2  | 3  | 2  | 5  |    |   |    |   | 3  |
| JCVIGM_261055_20110307 | pgi  | glucose-6-phosphate isomerase                                    |  |    |    |    |    |    |    | 2  |    |    |    |   |    |   |    |
| JCVIGM_286986_20110307 | pgi  | glucose-6-phosphate isomerase                                    |  | 7  | 4  | 3  | 7  | 12 | 13 | 3  | 13 | 7  | 7  | 3 |    |   | 4  |
| JCVIGM_296222_20110307 | pgi  | glucose-6-phosphate isomerase                                    |  | 3  | 5  | 3  | 3  | 7  | 4  |    | 1  | 1  | 4  | 1 |    |   | 4  |

|                        |      |                                               |    |   |   |   |    |   |    |    |    |   |   |   |   |   |    |   |  |
|------------------------|------|-----------------------------------------------|----|---|---|---|----|---|----|----|----|---|---|---|---|---|----|---|--|
| JCVIGM_296223_20110307 | pgi  | glucose-6-phosphate isomerase                 |    |   |   |   |    |   | 1  |    |    | 1 |   |   |   |   |    |   |  |
| JCVIGM_346043_20110307 | pgi  | glucose-6-phosphate isomerase                 |    |   |   | 1 |    |   |    |    |    | 1 |   |   |   |   |    |   |  |
| JCVIGM_407434_20110307 | pgi  | glucose-6-phosphate isomerase                 | 8  | 6 |   | 8 | 12 | 6 | 11 | 28 | 13 | 5 | 4 |   |   |   | 15 | 5 |  |
| JCVIGM_433684_20110307 | pgi  | glucose-6-phosphate isomerase                 |    | 2 | 8 | 4 | 5  | 7 |    |    |    | 1 |   | 6 |   |   | 3  |   |  |
| JCVIGM_036452_20110307 | pgiA | glucose-6-phosphate isomerase A               | 2  | 1 | 1 |   | 1  | 2 |    | 1  | 2  | 1 | 2 |   |   |   |    |   |  |
| JCVIGM_001673_20110307 | uxaC | glucuronate isomerase                         |    |   |   |   |    | 1 |    | 1  |    |   |   |   |   |   |    |   |  |
| JCVIGM_001890_20110307 | uxaC | glucuronate isomerase                         | 1  |   |   |   | 2  |   |    |    |    |   |   |   |   |   |    |   |  |
| JCVIGM_105608_20110307 | uxaC | glucuronate isomerase                         | 1  |   |   | 1 |    |   |    | 1  |    |   |   |   |   |   | 2  |   |  |
| JCVIGM_028337_20110307 |      | glutamate dehydrogenase                       |    |   |   | 1 |    |   |    |    |    | 1 | 1 |   |   |   |    | 1 |  |
| JCVIGM_079729_20110307 | GDH  | glutamate dehydrogenase (fragment)            |    |   |   |   |    |   |    |    |    |   |   |   |   |   |    |   |  |
| JCVIGM_026222_20110307 |      | glutamate dehydrogenase (NADP(+))             | 2  | 1 |   | 1 | 2  | 1 |    |    | 2  |   |   |   |   |   | 1  | 1 |  |
| JCVIGM_051813_20110307 |      | glutamate dehydrogenase, nADP-specific        | 1  | 3 |   | 1 |    | 1 |    | 1  | 2  | 2 |   | 1 | 1 |   |    | 1 |  |
| JCVIGM_081547_20110307 |      | glutamate dehydrogenase, NADP-specific        | 19 | 7 | 6 | 7 | 15 | 9 | 13 | 11 | 16 | 7 | 7 |   | 5 | 3 | 7  | 7 |  |
| JCVIGM_083070_20110307 |      | glutamate dehydrogenase, NADP-specific        | 2  | 7 | 1 | 1 | 1  |   |    |    |    | 2 |   |   |   |   |    |   |  |
| JCVIGM_112581_20110307 |      | glutamate dehydrogenase, NADP-specific        | 1  | 4 |   |   |    |   |    |    |    |   |   |   |   |   |    |   |  |
| JCVIGM_235230_20110307 |      | glutamate dehydrogenase, NADP-specific        | 5  | 4 | 3 | 5 | 9  | 9 | 5  | 6  | 5  | 6 | 3 | 2 | 2 | 2 | 3  | 2 |  |
| JCVIGM_395419_20110307 |      | glutamate dehydrogenase, NADP-specific        | 2  |   |   | 2 | 1  | 1 | 2  | 1  | 1  |   | 1 |   |   |   |    |   |  |
| JCVIGM_000822_20110307 | gdhB | glutamate dehydrogenase, NAD-specific         | 3  | 4 | 4 | 3 | 3  | 1 | 1  | 2  | 1  | 1 | 2 | 1 |   |   | 1  | 3 |  |
| JCVIGM_031962_20110307 | gdhB | glutamate dehydrogenase, NAD-specific         | 1  | 1 |   |   |    |   |    |    |    |   |   |   |   |   |    |   |  |
| JCVIGM_033111_20110307 | gdhB | glutamate dehydrogenase, NAD-specific         | 1  |   | 1 |   |    |   |    |    | 1  |   |   |   |   |   |    |   |  |
| JCVIGM_044177_20110307 | gdhB | glutamate dehydrogenase, NAD-specific         |    |   |   |   |    |   |    |    |    | 1 |   | 1 |   |   |    |   |  |
| JCVIGM_072261_20110307 | gdh  | glutamate dehydrogenase, NAD-specific         | 2  | 2 | 1 | 1 | 2  |   | 1  | 1  | 1  | 1 |   |   |   |   | 2  |   |  |
| JCVIGM_124713_20110307 | gdhB | glutamate dehydrogenase, NAD-specific         | 2  | 2 |   | 2 |    |   |    | 1  |    |   |   | 2 |   |   | 1  |   |  |
| JCVIGM_030438_20110307 |      | glutamate dehydrogenase/leucine dehydrogenase | 3  | 3 | 5 | 4 | 7  | 7 | 2  | 3  | 3  | 5 | 3 | 4 | 1 |   | 3  | 1 |  |
| JCVIGM_067262_20110307 |      | glutamate dehydrogenase/leucine dehydrogenase | 2  |   |   |   |    | 1 |    | 1  | 1  |   | 1 |   | 1 |   | 1  | 1 |  |
| JCVIGM_071296_20110307 |      | glutamate dehydrogenase/leucine dehydrogenase | 2  | 2 |   | 1 | 2  |   |    | 2  | 2  | 2 |   |   |   |   | 2  |   |  |
| JCVIGM_130579_20110307 |      | glutamate dehydrogenase/leucine dehydrogenase | 1  | 6 | 1 | 1 | 1  | 1 | 3  | 2  | 3  | 3 | 2 |   | 1 |   | 1  |   |  |
| JCVIGM_141521_20110307 |      | glutamate dehydrogenase/leucine dehydrogenase | 10 | 6 | 3 | 6 | 10 | 7 | 8  | 8  | 9  | 7 | 3 | 1 | 4 | 3 | 2  | 4 |  |
| JCVIGM_226798_20110307 |      | glutamate dehydrogenase/leucine dehydrogenase | 5  | 3 | 2 | 2 | 9  | 6 | 6  | 5  | 3  | 4 | 4 |   | 1 | 1 | 5  | 1 |  |
| JCVIGM_167424_20110307 | gltA | glutamate synthase (NADPH), homotetrameric    |    | 1 |   | 1 | 1  | 1 |    |    |    | 2 |   |   |   |   |    |   |  |



|                        |      |                                                                      |  |    |    |   |   |    |    |    |    |   |    |   |   |   |   |   |   |
|------------------------|------|----------------------------------------------------------------------|--|----|----|---|---|----|----|----|----|---|----|---|---|---|---|---|---|
| JCVIGM_009248_20110307 | gap  | glyceraldehyde 3-phosphate dehydrogenase, C-terminal domain          |  | 5  |    | 2 | 2 | 1  | 2  | 1  | 3  | 4 |    | 1 |   | 1 |   | 3 | 2 |
| JCVIGM_027319_20110307 |      | glyceraldehyde 3-phosphate dehydrogenase, C-terminal domain          |  | 5  | 1  | 2 | 1 | 5  | 3  | 2  | 4  | 3 | 2  | 1 |   | 1 | 1 | 2 |   |
| JCVIGM_075124_20110307 |      | glyceraldehyde 3-phosphate dehydrogenase, C-terminal domain          |  | 2  | 2  | 3 | 1 | 1  | 1  | 2  | 3  | 4 |    | 2 | 2 | 5 |   | 2 | 5 |
| JCVIGM_079320_20110307 |      | glyceraldehyde 3-phosphate dehydrogenase, C-terminal domain          |  |    |    |   |   | 1  |    | 4  | 1  | 2 |    |   |   | 1 |   |   |   |
| JCVIGM_083011_20110307 |      | glyceraldehyde 3-phosphate dehydrogenase, C-terminal domain          |  |    |    |   |   |    |    |    |    |   |    | 4 | 3 | 4 | 4 | 6 |   |
| JCVIGM_088090_20110307 |      | glyceraldehyde 3-phosphate dehydrogenase, C-terminal domain          |  | 1  |    | 1 | 2 |    |    | 1  | 1  | 2 | 1  | 1 | 3 | 2 | 1 | 1 | 2 |
| JCVIGM_141419_20110307 |      | glyceraldehyde 3-phosphate dehydrogenase, C-terminal domain          |  | 3  |    | 1 | 3 |    |    | 1  | 2  | 7 |    | 4 | 2 | 2 |   | 4 | 5 |
| JCVIGM_159787_20110307 |      | glyceraldehyde 3-phosphate dehydrogenase, C-terminal domain          |  | 2  |    |   | 1 | 1  |    |    | 2  | 1 |    |   |   | 1 |   |   |   |
| JCVIGM_169660_20110307 |      | glyceraldehyde 3-phosphate dehydrogenase, C-terminal domain          |  | 2  |    |   | 1 | 1  |    |    | 2  | 2 |    |   |   |   |   | 1 | 1 |
| JCVIGM_170407_20110307 |      | glyceraldehyde 3-phosphate dehydrogenase, C-terminal domain          |  | 4  | 1  | 1 | 5 | 2  | 3  | 3  | 4  | 7 | 1  | 3 | 3 | 2 | 2 | 4 | 4 |
| JCVIGM_189194_20110307 |      | glyceraldehyde 3-phosphate dehydrogenase, C-terminal domain          |  | 4  | 3  | 2 | 2 | 3  | 3  | 4  | 6  | 3 | 2  | 1 |   | 1 | 1 |   |   |
| JCVIGM_224384_20110307 |      | glyceraldehyde 3-phosphate dehydrogenase, C-terminal domain          |  | 2  | 1  | 2 | 2 | 2  | 5  |    | 3  | 1 | 1  |   |   | 1 |   | 1 |   |
| JCVIGM_268659_20110307 |      | glyceraldehyde 3-phosphate dehydrogenase, C-terminal domain          |  | 3  | 3  |   | 1 | 2  | 4  |    | 6  |   |    |   |   |   | 1 | 2 |   |
| JCVIGM_313872_20110307 |      | glyceraldehyde 3-phosphate dehydrogenase, C-terminal domain          |  | 1  |    |   |   |    |    |    |    | 1 |    |   |   |   |   |   | 1 |
| JCVIGM_319196_20110307 |      | glyceraldehyde 3-phosphate dehydrogenase, C-terminal domain          |  |    |    |   |   |    |    | 1  |    | 1 | 2  |   |   |   |   |   |   |
| JCVIGM_360253_20110307 |      | glyceraldehyde 3-phosphate dehydrogenase, C-terminal domain          |  |    |    |   |   |    |    |    |    |   |    | 2 | 1 | 2 | 1 | 3 |   |
| JCVIGM_100377_20110307 | gap  | glyceraldehyde-3-phosphate dehydrogenase, type I                     |  | 12 | 16 | 6 | 9 | 12 | 18 | 10 | 13 | 8 | 15 | 6 |   | 3 | 3 | 3 | 3 |
| JCVIGM_294702_20110307 | pduC | glycerol dehydratase large subunit                                   |  | 3  | 10 | 9 | 5 | 10 | 10 |    | 2  | 2 | 2  |   |   |   |   |   |   |
| JCVIGM_338330_20110307 |      | glycerol dehydrogenase and related enzymes                           |  | 2  | 2  | 6 | 2 | 2  | 2  | 2  | 1  | 2 |    | 1 |   |   |   |   |   |
| JCVIGM_213371_20110307 | glyA | glycine hydroxymethyltransferase                                     |  |    |    |   |   |    |    |    |    |   |    |   |   |   |   |   | 1 |
| JCVIGM_015371_20110307 |      | histidine kinase                                                     |  |    | 1  |   |   | 1  |    |    |    |   |    | 1 |   |   |   |   |   |
| JCVIGM_369000_20110307 |      | hydrogenase, Fe-only                                                 |  |    |    |   |   |    |    |    |    |   |    | 1 |   |   |   |   |   |
| JCVIGM_048518_20110307 |      | hydrolyase, tartrate beta subunit/fumarate domain protein, Fe-S type |  | 1  |    | 1 | 3 |    |    |    | 1  |   |    |   |   |   |   |   |   |
| JCVIGM_000577_20110307 |      | hypothetical protein                                                 |  |    |    |   | 1 |    |    |    | 2  |   |    |   |   |   |   |   | 2 |
| JCVIGM_001656_20110307 |      | hypothetical protein                                                 |  | 3  | 2  |   | 1 | 2  | 3  | 1  | 1  | 2 | 3  | 1 |   | 1 | 1 |   |   |
| JCVIGM_004031_20110307 |      | hypothetical protein                                                 |  |    | 1  |   | 1 |    | 1  |    | 1  | 2 | 1  | 1 |   |   |   | 2 | 1 |
| JCVIGM_006083_20110307 |      | hypothetical protein                                                 |  |    |    |   | 1 | 2  | 1  |    |    |   |    |   |   |   |   |   |   |
| JCVIGM_006988_20110307 |      | hypothetical protein                                                 |  |    | 2  |   |   |    | 2  |    |    |   |    |   |   |   |   |   |   |
| JCVIGM_007410_20110307 |      | hypothetical protein                                                 |  | 1  |    |   | 1 | 1  | 1  | 1  | 2  | 2 |    |   |   |   |   |   |   |
| JCVIGM_009250_20110307 |      | hypothetical protein                                                 |  | 3  |    |   |   |    |    |    |    |   |    | 1 |   |   |   |   |   |











|                        |      |                      |  |   |    |   |   |    |    |   |    |    |    |    |   |   |   |   |   |
|------------------------|------|----------------------|--|---|----|---|---|----|----|---|----|----|----|----|---|---|---|---|---|
| JCVIGM_209517_20110307 |      | hypothetical protein |  | 4 | 4  |   | 3 | 4  | 4  | 3 | 3  | 4  | 2  | 1  |   | 2 |   | 5 | 2 |
| JCVIGM_210696_20110307 |      | hypothetical protein |  |   |    |   |   |    |    |   |    |    | 4  |    |   |   |   |   |   |
| JCVIGM_210946_20110307 |      | hypothetical protein |  | 3 |    | 2 | 2 | 1  | 4  | 2 | 2  | 1  |    |    |   |   |   |   |   |
| JCVIGM_211394_20110307 |      | hypothetical protein |  | 1 | 3  | 1 | 2 | 2  | 2  | 1 | 2  | 2  | 1  |    |   |   |   | 3 | 1 |
| JCVIGM_212706_20110307 |      | hypothetical protein |  | 7 | 4  | 1 | 1 | 10 | 5  | 1 | 9  | 2  | 5  |    |   |   |   | 3 |   |
| JCVIGM_213389_20110307 |      | hypothetical protein |  | 2 | 2  | 2 | 3 | 3  | 2  | 3 | 3  | 5  | 3  | 3  |   | 1 |   | 2 |   |
| JCVIGM_219434_20110307 |      | hypothetical protein |  |   |    |   |   |    |    |   |    |    |    |    | 1 |   |   |   |   |
| JCVIGM_219781_20110307 |      | hypothetical protein |  |   |    |   | 2 |    | 1  | 1 | 1  | 1  | 1  |    | 1 |   |   |   |   |
| JCVIGM_222747_20110307 |      | hypothetical protein |  |   | 2  |   |   |    |    |   |    |    | 1  |    |   |   |   |   |   |
| JCVIGM_229339_20110307 |      | hypothetical protein |  |   |    |   |   |    |    |   |    |    |    |    |   |   |   |   |   |
| JCVIGM_234241_20110307 |      | hypothetical protein |  | 2 | 1  | 2 | 2 | 4  | 3  |   | 3  | 3  | 3  | 2  |   |   |   | 1 |   |
| JCVIGM_237601_20110307 |      | hypothetical protein |  |   | 1  |   |   |    |    |   |    |    | 6  | 10 |   |   |   | 1 | 1 |
| JCVIGM_239052_20110307 |      | hypothetical protein |  |   |    |   |   |    |    |   | 1  |    |    |    | 1 |   |   |   |   |
| JCVIGM_245141_20110307 |      | hypothetical protein |  | 5 | 15 | 2 | 7 | 6  | 6  | 3 | 8  | 8  | 11 | 8  |   | 3 | 2 | 7 | 3 |
| JCVIGM_246343_20110307 |      | hypothetical protein |  |   |    |   |   |    | 1  |   | 1  |    |    |    |   |   |   |   |   |
| JCVIGM_246344_20110307 |      | hypothetical protein |  | 1 |    |   |   | 1  |    |   |    |    |    |    |   |   |   |   |   |
| JCVIGM_247614_20110307 |      | hypothetical protein |  |   |    |   | 1 |    |    |   | 1  |    |    |    |   |   | 1 |   | 2 |
| JCVIGM_249782_20110307 |      | hypothetical protein |  |   |    |   |   |    |    |   |    |    |    | 3  |   |   | 2 |   |   |
| JCVIGM_251147_20110307 |      | hypothetical protein |  | 1 |    |   | 1 |    |    |   |    |    |    |    |   |   |   |   |   |
| JCVIGM_251362_20110307 |      | hypothetical protein |  | 9 | 8  | 5 | 9 | 10 | 11 | 7 | 10 | 15 | 10 | 9  | 4 | 4 | 4 | 7 | 6 |
| JCVIGM_251712_20110307 |      | hypothetical protein |  | 3 |    |   | 1 | 1  | 1  | 3 | 5  | 3  |    |    |   | 1 | 1 |   | 2 |
| JCVIGM_256398_20110307 |      | hypothetical protein |  | 2 |    |   |   |    |    |   |    |    |    |    |   |   |   |   |   |
| JCVIGM_259370_20110307 |      | hypothetical protein |  |   |    |   |   |    |    |   |    |    | 4  |    |   |   |   |   |   |
| JCVIGM_262707_20110307 |      | hypothetical protein |  |   | 1  |   |   |    |    |   |    |    | 1  |    |   |   |   |   |   |
| JCVIGM_265819_20110307 | etfB | hypothetical protein |  | 5 | 4  | 2 | 1 |    | 1  |   | 3  |    | 1  |    |   |   |   |   |   |
| JCVIGM_268646_20110307 |      | hypothetical protein |  | 2 |    | 1 | 4 | 2  | 2  |   |    |    |    |    |   |   |   | 1 |   |
| JCVIGM_274621_20110307 |      | hypothetical protein |  |   |    |   |   |    |    |   |    |    |    |    |   |   |   |   | 1 |
| JCVIGM_277806_20110307 |      | hypothetical protein |  | 2 | 1  | 1 |   | 1  | 2  | 2 | 2  | 2  |    | 1  |   |   |   |   |   |
| JCVIGM_281111_20110307 |      | hypothetical protein |  | 2 | 2  |   |   | 1  | 1  | 3 | 2  | 2  | 1  | 1  |   |   |   | 2 |   |
| JCVIGM_281956_20110307 |      | hypothetical protein |  | 2 | 1  | 3 |   | 2  | 4  |   | 2  |    |    | 2  | 2 |   |   | 2 |   |
| JCVIGM_282080_20110307 |      | hypothetical protein |  | 1 | 1  |   | 1 |    |    |   | 2  |    |    |    |   |   |   |   |   |





|                        |                      |  |   |    |   |   |   |   |   |   |    |    |   |   |   |   |   |   |   |
|------------------------|----------------------|--|---|----|---|---|---|---|---|---|----|----|---|---|---|---|---|---|---|
| JCVIGM_323810_20110307 | hypothetical protein |  |   |    |   |   |   |   |   |   |    | 1  | 1 |   |   |   |   |   |   |
| JCVIGM_327403_20110307 | hypothetical protein |  |   |    |   | 1 |   |   |   |   | 1  |    |   |   |   |   |   |   |   |
| JCVIGM_328614_20110307 | hypothetical protein |  | 1 | 1  |   |   |   |   |   |   |    |    |   |   |   |   |   |   |   |
| JCVIGM_332056_20110307 | hypothetical protein |  |   | 2  |   |   |   |   |   |   |    |    |   |   |   |   |   |   |   |
| JCVIGM_332688_20110307 | hypothetical protein |  | 3 | 4  | 2 | 1 | 6 | 4 |   | 2 | 2  | 8  | 1 |   | 1 | 1 | 1 |   |   |
| JCVIGM_333745_20110307 | hypothetical protein |  | 3 | 2  | 1 |   | 1 |   | 1 | 3 | 2  | 5  | 1 |   |   | 1 | 1 |   |   |
| JCVIGM_336004_20110307 | hypothetical protein |  |   |    | 2 |   | 1 | 1 |   |   |    |    |   |   |   |   |   | 1 |   |
| JCVIGM_336057_20110307 | hypothetical protein |  |   |    |   |   |   |   |   |   |    | 1  |   |   |   |   |   |   |   |
| JCVIGM_340014_20110307 | hypothetical protein |  |   |    |   |   |   |   |   |   |    |    |   |   |   |   |   |   |   |
| JCVIGM_340609_20110307 | hypothetical protein |  | 8 | 15 | 1 | 7 | 5 | 7 | 5 | 8 | 11 | 15 | 3 |   | 3 | 1 | 4 | 4 |   |
| JCVIGM_341200_20110307 | hypothetical protein |  | 1 |    | 1 | 3 | 3 | 5 |   | 3 | 1  | 3  |   | 2 |   |   | 1 |   |   |
| JCVIGM_344661_20110307 | hypothetical protein |  |   |    |   |   |   | 1 |   | 5 | 1  |    |   |   |   |   |   |   |   |
| JCVIGM_345968_20110307 | hypothetical protein |  |   |    |   | 2 | 1 |   |   | 4 |    |    |   |   |   |   |   |   |   |
| JCVIGM_348560_20110307 | hypothetical protein |  |   |    |   |   |   |   |   |   |    |    |   |   |   |   |   |   |   |
| JCVIGM_351456_20110307 | hypothetical protein |  |   | 3  |   |   | 1 |   |   |   | 1  | 2  |   |   |   |   |   |   |   |
| JCVIGM_359900_20110307 | hypothetical protein |  |   |    |   |   | 1 |   |   |   | 1  |    |   |   |   |   |   |   |   |
| JCVIGM_362686_20110307 | hypothetical protein |  | 3 | 2  | 1 |   | 1 | 2 | 3 | 2 | 3  | 1  | 2 |   |   |   |   |   |   |
| JCVIGM_364085_20110307 | hypothetical protein |  |   |    |   |   |   |   |   |   |    |    |   |   |   |   |   |   |   |
| JCVIGM_365092_20110307 | hypothetical protein |  |   | 2  |   |   |   |   |   |   |    | 1  |   |   |   |   |   |   |   |
| JCVIGM_367321_20110307 | hypothetical protein |  |   |    |   |   |   |   |   |   |    |    |   |   | 1 | 1 |   |   |   |
| JCVIGM_367720_20110307 | hypothetical protein |  | 3 |    | 1 | 2 | 2 | 2 | 2 | 4 | 3  |    |   |   |   |   |   | 2 |   |
| JCVIGM_368650_20110307 | hypothetical protein |  | 3 | 2  |   |   |   |   |   |   |    |    |   |   |   |   |   |   |   |
| JCVIGM_369484_20110307 | hypothetical protein |  | 2 |    | 1 | 1 | 1 | 2 | 1 | 3 | 2  |    |   |   |   |   |   |   |   |
| JCVIGM_371571_20110307 | hypothetical protein |  |   |    |   |   |   |   |   | 1 |    |    |   |   |   |   |   |   | 2 |
| JCVIGM_372380_20110307 | hypothetical protein |  |   |    |   | 2 | 1 | 1 |   | 2 |    | 1  |   |   |   |   |   |   |   |
| JCVIGM_373222_20110307 | hypothetical protein |  | 1 |    |   | 1 | 2 |   |   | 3 | 1  |    |   |   |   |   |   |   |   |
| JCVIGM_373315_20110307 | hypothetical protein |  |   |    |   |   |   |   |   |   |    |    |   |   |   |   |   |   |   |
| JCVIGM_375019_20110307 | hypothetical protein |  |   |    |   | 1 |   | 3 |   |   |    |    |   |   |   |   |   |   | 1 |
| JCVIGM_379110_20110307 | hypothetical protein |  | 1 | 1  |   | 1 | 1 |   |   | 2 | 1  | 1  |   |   |   |   |   |   | 1 |

|                        |                                                       |  |   |   |   |   |    |   |   |   |   |   |   |  |   |   |   |  |   |   |
|------------------------|-------------------------------------------------------|--|---|---|---|---|----|---|---|---|---|---|---|--|---|---|---|--|---|---|
| JCVIGM_380771_20110307 | hypothetical protein                                  |  |   |   |   | 1 | 1  |   |   |   |   |   |   |  |   |   |   |  | 1 | 1 |
| JCVIGM_387933_20110307 | hypothetical protein                                  |  |   |   |   |   |    |   |   |   |   |   |   |  |   |   |   |  | 1 | 4 |
| JCVIGM_390199_20110307 | hypothetical protein                                  |  |   |   |   |   | 1  | 1 |   |   |   |   |   |  |   |   |   |  |   |   |
| JCVIGM_390242_20110307 | hypothetical protein                                  |  | 1 | 1 |   | 3 |    |   |   |   |   |   |   |  |   |   |   |  |   |   |
| JCVIGM_390806_20110307 | hypothetical protein                                  |  | 1 |   | 2 | 3 | 3  | 3 | 1 | 3 | 2 |   |   |  |   |   |   |  | 2 | 2 |
| JCVIGM_391550_20110307 | hypothetical protein                                  |  |   | 1 |   |   |    |   |   |   | 1 |   |   |  |   |   |   |  |   |   |
| JCVIGM_393860_20110307 | hypothetical protein                                  |  |   | 1 |   |   |    |   |   |   |   |   |   |  |   |   |   |  |   |   |
| JCVIGM_398055_20110307 | hypothetical protein                                  |  |   | 1 |   |   |    |   |   |   | 1 |   |   |  |   |   |   |  |   |   |
| JCVIGM_398168_20110307 | hypothetical protein                                  |  |   |   |   |   |    |   |   | 1 | 5 |   |   |  |   |   |   |  |   |   |
| JCVIGM_399462_20110307 | hypothetical protein                                  |  |   |   |   |   |    |   |   |   |   |   |   |  |   |   |   |  |   |   |
| JCVIGM_400027_20110307 | hypothetical protein                                  |  | 4 | 3 | 3 | 3 | 10 | 7 | 4 | 5 | 3 | 5 |   |  |   |   |   |  | 2 |   |
| JCVIGM_400278_20110307 | hypothetical protein                                  |  |   |   |   |   | 1  |   |   |   |   |   |   |  |   |   |   |  | 2 |   |
| JCVIGM_400950_20110307 | hypothetical protein                                  |  |   |   |   | 2 |    |   |   |   |   |   |   |  |   |   |   |  |   |   |
| JCVIGM_405787_20110307 | hypothetical protein                                  |  |   |   |   |   |    |   |   |   | 1 |   |   |  |   |   |   |  |   |   |
| JCVIGM_410986_20110307 | hypothetical protein                                  |  |   |   |   |   |    |   |   |   |   |   |   |  |   |   |   |  |   |   |
| JCVIGM_414552_20110307 | hypothetical protein                                  |  | 3 | 3 | 5 | 3 | 3  | 2 |   | 4 | 4 | 9 | 2 |  |   |   |   |  | 4 |   |
| JCVIGM_418955_20110307 | hypothetical protein                                  |  |   |   |   |   |    |   |   |   |   |   |   |  |   |   |   |  |   |   |
| JCVIGM_420396_20110307 | hypothetical protein                                  |  |   |   |   |   | 1  | 1 |   |   |   |   |   |  |   |   |   |  |   |   |
| JCVIGM_420773_20110307 | hypothetical protein                                  |  | 1 |   |   | 1 |    | 1 |   |   |   |   |   |  |   |   |   |  | 1 |   |
| JCVIGM_424310_20110307 | hypothetical protein                                  |  | 2 | 1 | 2 | 1 | 1  | 1 | 3 | 4 | 2 | 3 | 2 |  |   |   | 1 |  | 1 |   |
| JCVIGM_434782_20110307 | hypothetical protein                                  |  |   |   |   |   | 1  | 1 |   |   |   |   |   |  |   |   |   |  |   |   |
| JCVIGM_441424_20110307 | hypothetical protein                                  |  |   |   |   |   |    |   |   |   |   |   |   |  |   | 1 |   |  |   |   |
| JCVIGM_444308_20110307 | hypothetical protein                                  |  | 1 |   |   |   |    |   |   |   | 1 |   |   |  |   |   |   |  |   |   |
| JCVIGM_444309_20110307 | hypothetical protein                                  |  | 1 | 1 |   |   | 1  | 1 |   |   |   | 2 |   |  |   |   |   |  |   |   |
| JCVIGM_055829_20110307 | hypothetical protein BACCOPRO_02435                   |  |   |   |   |   |    | 1 |   |   |   |   |   |  |   |   |   |  |   |   |
| JCVIGM_158091_20110307 | hypothetical protein BACCOPRO_03643                   |  | 2 | 2 | 2 | 2 | 2  | 2 | 2 | 3 | 2 | 2 |   |  | 2 |   |   |  | 1 | 2 |
| JCVIGM_068437_20110307 | hypothetical protein CLOST_1033                       |  |   |   |   |   |    |   |   |   |   |   |   |  |   |   |   |  |   |   |
| JCVIGM_442772_20110307 | hypothetical protein ELI_0537                         |  | 1 | 2 |   |   |    |   |   |   |   |   |   |  |   |   |   |  | 1 |   |
| JCVIGM_010811_20110307 | inosine guanosine and xanthosine phosphorylase family |  | 2 |   | 2 | 1 | 1  | 1 | 1 | 1 | 1 | 1 | 1 |  |   |   |   |  | 2 | 3 |





|                        |      |                                                                       |  |   |   |   |   |   |   |   |   |   |   |   |   |   |   |   |   |
|------------------------|------|-----------------------------------------------------------------------|--|---|---|---|---|---|---|---|---|---|---|---|---|---|---|---|---|
| JCVIGM_028360_20110307 | mdh  | malate dehydrogenase                                                  |  | 4 |   | 4 | 6 | 2 | 3 | 1 | 6 | 3 | 3 | 2 | 3 | 1 | 2 | 5 | 4 |
| JCVIGM_127124_20110307 | mdh  | malate dehydrogenase                                                  |  | 3 | 2 | 1 | 2 |   | 1 | 6 | 2 | 5 | 1 | 3 |   | 6 | 3 | 3 | 4 |
| JCVIGM_229225_20110307 | mdh  | malate dehydrogenase                                                  |  |   |   |   |   |   |   |   |   |   |   | 1 |   |   |   |   |   |
| JCVIGM_079110_20110307 |      | malate dehydrogenase (oxaloacetate-decarboxylating)                   |  | 1 |   | 1 | 1 | 1 | 1 |   |   |   |   |   |   |   |   |   |   |
| JCVIGM_020629_20110307 | mdh  | malate dehydrogenase, NAD-dependent                                   |  | 2 | 1 | 1 | 2 | 2 | 1 |   | 2 | 2 | 1 |   | 3 |   |   | 1 | 2 |
| JCVIGM_007627_20110307 |      | maltose-binding protein                                               |  |   |   |   | 1 |   |   |   |   | 1 |   |   |   |   |   |   |   |
| JCVIGM_201419_20110307 |      | maltose-binding protein                                               |  | 3 | 2 |   |   | 2 | 2 | 4 | 5 | 3 | 1 | 1 |   | 1 |   | 5 | 2 |
| JCVIGM_173530_20110307 |      | membrane protein, bmp family                                          |  | 2 |   |   |   |   |   |   |   |   |   |   |   |   |   |   |   |
| JCVIGM_186148_20110307 |      | membrane protein, bmp family                                          |  | 5 |   |   |   |   |   |   |   |   |   |   |   |   |   |   |   |
| JCVIGM_052677_20110307 |      | metallo-beta-lactamase superfamily                                    |  |   |   |   |   |   |   | 2 |   | 2 |   |   |   |   |   |   |   |
| JCVIGM_038699_20110307 | metK | methionine adenosyltransferase                                        |  |   |   | 1 |   | 1 |   |   |   |   |   |   |   |   |   |   |   |
| JCVIGM_046971_20110307 | metK | methionine adenosyltransferase                                        |  |   |   |   |   |   |   |   |   |   |   |   |   |   |   |   |   |
| JCVIGM_076017_20110307 | metK | methionine adenosyltransferase                                        |  |   |   |   |   | 1 | 1 |   |   |   |   |   |   |   |   |   |   |
| JCVIGM_211427_20110307 |      | methylmalonate-semialdehyde dehydrogenase (acylating)                 |  |   |   |   |   |   |   |   |   |   |   |   |   |   |   |   |   |
| JCVIGM_014933_20110307 | mmdA | methylmalonyl-coA decarboxylase                                       |  | 1 | 2 |   | 1 |   |   |   |   |   | 1 |   |   |   |   |   |   |
| JCVIGM_034121_20110307 |      | methylmalonyl-coA mutase large subunit                                |  |   |   |   |   |   |   |   |   | 1 |   |   |   |   |   |   | 1 |
| JCVIGM_255025_20110307 |      | methylmalonyl-coA mutase large subunit                                |  | 2 |   |   |   |   |   |   |   |   |   |   |   |   |   |   |   |
| JCVIGM_082989_20110307 |      | methylmalonyl-coA mutase N-terminal domain                            |  |   |   |   | 1 |   |   |   | 1 |   |   |   |   |   |   |   |   |
| JCVIGM_069236_20110307 | mutA | methylmalonyl-coA mutase, small subunit                               |  | 1 |   |   | 1 |   |   |   |   |   |   |   |   |   |   |   | 1 |
| JCVIGM_033013_20110307 |      | microcompartments protein                                             |  | 4 | 4 | 1 | 4 | 2 | 1 | 1 | 7 | 3 | 6 | 2 |   | 2 | 1 | 3 |   |
| JCVIGM_083041_20110307 |      | microcompartments protein                                             |  | 2 |   | 1 | 2 | 2 | 1 | 1 | 3 | 3 | 2 | 1 |   |   |   |   | 3 |
| JCVIGM_188817_20110307 |      | monosaccharide ABC transporter substrate-binding protein, CUT2 family |  |   |   |   | 1 | 1 | 1 | 1 | 4 | 2 |   |   |   |   |   |   |   |
| JCVIGM_039831_20110307 |      | monosaccharide ABC transporter substrate-binding protein, CUT2 family |  | 1 |   |   |   | 1 |   |   |   |   | 1 |   |   |   |   |   | 1 |
| JCVIGM_192144_20110307 |      | monosaccharide ABC transporter substrate-binding protein, CUT2 family |  |   | 1 | 1 | 2 | 2 |   |   |   |   |   |   |   |   |   |   | 1 |
| JCVIGM_070547_20110307 | purE | N5-carboxyaminoimidazole ribonucleotide mutase                        |  |   |   |   |   |   |   |   |   |   |   |   |   |   |   |   |   |
| JCVIGM_060713_20110307 |      | N-acetylneuraminate lyase                                             |  | 6 | 2 |   |   | 1 | 1 |   | 1 |   | 1 |   |   |   |   |   |   |
| JCVIGM_233593_20110307 | nuoI | NADH-quinone oxidoreductase subunit I                                 |  |   | 1 |   |   |   |   |   |   |   | 1 |   | 1 |   |   |   |   |
| JCVIGM_057221_20110307 |      | NADP-dependent malic enzyme                                           |  | 4 |   |   |   |   |   |   |   |   |   |   |   |   |   |   |   |
| JCVIGM_231459_20110307 |      | NADPH-dependent butanol dehydrogenase                                 |  |   |   | 1 |   |   |   |   |   |   |   |   |   |   |   |   |   |
| JCVIGM_121448_20110307 |      | nifU-related domain containing protein                                |  | 5 | 1 | 1 | 2 | 4 | 4 | 3 | 3 | 3 | 2 | 2 |   | 1 | 1 | 2 | 1 |

|                        |      |                                                                                                          |  |    |    |    |    |    |    |    |    |    |    |   |   |   |   |    |    |
|------------------------|------|----------------------------------------------------------------------------------------------------------|--|----|----|----|----|----|----|----|----|----|----|---|---|---|---|----|----|
| JCVIGM_028245_20110307 |      | nitrate/sulfonate/bicarbonate ABC transporter, periplasmic nitrate/sulfonate/bicarbonate-binding protein |  |    |    |    |    |    | 1  |    |    |    |    |   |   |   |   |    |    |
| JCVIGM_149307_20110307 |      | nitrite/sulfite reductase, 4Fe-4S iron-sulfur cluster-binding domain protein                             |  | 2  |    |    |    |    |    |    |    |    |    |   |   |   |   |    |    |
| JCVIGM_243460_20110307 |      | nitrogen regulation protein                                                                              |  |    |    | 1  |    |    |    |    |    |    |    |   |   |   |   |    |    |
| JCVIGM_074550_20110307 |      | nitroreductase family                                                                                    |  | 10 |    | 3  | 3  | 1  | 2  |    | 1  |    |    |   |   |   |   |    | 1  |
| JCVIGM_142709_20110307 |      | oligopeptide-binding protein OppA                                                                        |  | 1  |    |    | 1  | 1  |    |    |    | 1  |    |   |   |   |   |    |    |
| JCVIGM_287642_20110307 |      | oligopeptide-binding protein OppA                                                                        |  | 3  | 5  | 1  | 1  | 1  | 2  | 6  | 1  | 1  | 1  | 2 |   |   |   |    | 1  |
| JCVIGM_291730_20110307 |      | oligopeptide-binding protein OppA                                                                        |  |    |    |    |    |    |    |    |    | 1  | 3  |   |   |   |   |    |    |
| JCVIGM_320377_20110307 |      | oligopeptide-binding protein OppA                                                                        |  |    |    |    |    |    |    |    |    |    |    |   |   |   |   |    |    |
| JCVIGM_030295_20110307 |      | ompA family protein                                                                                      |  |    |    |    |    |    |    |    |    |    |    | 2 | 2 |   |   |    | 1  |
| JCVIGM_021098_20110307 | pyrF | orotidine 5'-phosphate decarboxylase                                                                     |  |    |    |    |    | 1  | 1  | 1  | 1  | 1  |    |   |   |   |   |    | 1  |
| JCVIGM_069275_20110307 |      | outer membrane protein                                                                                   |  | 2  |    | 2  |    | 2  |    |    |    |    |    |   |   |   |   |    |    |
| JCVIGM_021757_20110307 |      | oxaloacetate decarboxylase, alpha subunit                                                                |  |    |    |    |    |    | 1  |    | 2  |    |    |   |   |   |   |    |    |
| JCVIGM_185159_20110307 |      | oxidoreductase domain protein                                                                            |  | 1  | 1  |    |    |    |    |    |    |    |    |   |   |   |   |    |    |
| JCVIGM_227464_20110307 |      | oxidoreductase domain protein                                                                            |  | 1  |    | 1  |    |    | 2  |    |    |    |    |   |   |   |   |    | 1  |
| JCVIGM_292816_20110307 |      | oxidoreductase domain protein                                                                            |  |    | 1  |    |    |    |    | 1  |    |    | 1  |   |   |   |   |    |    |
| JCVIGM_098050_20110307 |      | peptide/nickel ABC transporter substrate-binding protein                                                 |  | 1  |    |    |    |    |    |    |    |    |    |   |   |   |   |    |    |
| JCVIGM_051204_20110307 |      | peptidyl-prolyl cis-trans isomerase                                                                      |  |    |    |    |    |    |    |    | 1  |    |    |   |   |   |   |    | 4  |
| JCVIGM_077390_20110307 |      | peptidyl-prolyl cis-trans isomerase                                                                      |  | 3  |    |    |    |    |    |    |    |    |    |   |   |   |   |    |    |
| JCVIGM_089246_20110307 |      | peptidyl-prolyl cis-trans isomerase                                                                      |  | 3  |    |    | 2  |    |    |    |    |    |    |   |   | 1 |   |    | 1  |
| JCVIGM_359878_20110307 |      | periplasmic binding protein/laci transcriptional regulator                                               |  |    | 2  |    |    |    |    |    |    |    |    |   |   |   |   |    |    |
| JCVIGM_330291_20110307 |      | periplasmic protein                                                                                      |  | 7  | 8  | 5  | 8  | 6  | 3  | 1  | 3  | 4  | 13 |   |   |   |   |    | 1  |
| JCVIGM_352406_20110307 |      | periplasmic protein                                                                                      |  | 10 | 15 | 1  | 3  | 9  | 10 | 5  | 11 | 7  | 20 | 5 | 1 | 2 | 1 | 8  | 5  |
| JCVIGM_063156_20110307 | pta  | phosphate acetyltransferase                                                                              |  | 1  | 2  | 1  |    | 1  | 2  | 1  | 1  | 1  | 2  | 1 |   | 1 |   | 1  | 1  |
| JCVIGM_141522_20110307 | pta  | phosphate acetyltransferase                                                                              |  | 2  | 2  | 1  | 2  | 2  | 3  | 2  | 3  | 2  | 3  | 2 |   |   |   | 1  | 1  |
| JCVIGM_008179_20110307 | pckA | phosphoenolpyruvate carboxykinase (ATP)                                                                  |  | 11 | 4  | 5  | 12 | 11 | 16 | 3  | 17 | 6  | 14 | 5 | 2 | 2 | 1 | 2  | 2  |
| JCVIGM_042402_20110307 | pckA | phosphoenolpyruvate carboxykinase (ATP)                                                                  |  | 1  |    |    |    |    | 1  |    |    | 2  |    |   |   |   |   |    |    |
| JCVIGM_051034_20110307 | pckA | phosphoenolpyruvate carboxykinase (ATP)                                                                  |  | 1  | 1  |    |    |    | 1  |    | 1  | 1  |    |   |   | 1 |   |    |    |
| JCVIGM_066626_20110307 | pckA | phosphoenolpyruvate carboxykinase (ATP)                                                                  |  | 16 |    | 6  | 11 | 6  | 6  | 3  | 13 | 16 |    | 2 | 8 | 4 | 2 | 6  | 15 |
| JCVIGM_070718_20110307 | pckA | phosphoenolpyruvate carboxykinase (ATP)                                                                  |  | 84 | 18 | 10 | 14 | 15 | 20 | 28 | 24 | 29 | 20 | 9 | 1 | 6 | 3 | 15 | 4  |













|                        |      |                                                    |  |    |    |    |    |    |    |    |     |     |     |    |    |    |   |    |    |
|------------------------|------|----------------------------------------------------|--|----|----|----|----|----|----|----|-----|-----|-----|----|----|----|---|----|----|
| JCVIGM_274754_20110307 | rpsJ | ribosomal protein S10                              |  |    |    |    |    | 1  | 1  | 1  |     | 1   | 1   |    |    |    |   |    |    |
| JCVIGM_021052_20110307 | rpsG | ribosomal protein S7                               |  | 1  |    |    |    |    |    |    |     | 1   |     |    |    |    |   |    |    |
| JCVIGM_089527_20110307 | rpsH | ribosomal protein S8                               |  | 2  |    | 1  | 2  | 2  | 2  |    |     | 3   | 1   | 1  |    |    |   |    | 1  |
| JCVIGM_106685_20110307 | rpsH | ribosomal protein S8                               |  | 4  | 1  | 1  | 2  | 2  | 3  |    |     | 2   | 2   | 1  |    |    |   |    |    |
| JCVIGM_116015_20110307 | rpsH | ribosomal protein S8                               |  |    | 1  | 1  |    | 2  | 1  | 2  |     | 1   |     |    |    |    |   |    | 1  |
| JCVIGM_158733_20110307 | rpsH | ribosomal protein S8                               |  |    |    | 1  |    |    |    |    |     | 1   |     |    |    |    |   |    |    |
| JCVIGM_202567_20110307 | rpsH | ribosomal protein S8                               |  |    |    | 1  | 1  | 3  | 1  |    |     |     |     |    |    |    |   |    |    |
| JCVIGM_216187_20110307 | rpsH | ribosomal protein S8                               |  |    |    |    | 1  | 1  |    |    |     | 1   |     |    |    |    |   |    |    |
| JCVIGM_114301_20110307 | rpsI | ribosomal protein S9/S16                           |  |    | 1  | 1  |    |    |    |    |     |     |     |    |    |    |   |    |    |
| JCVIGM_393651_20110307 | rpoD | RNA polymerase sigma factor                        |  |    |    |    |    |    |    |    |     |     | 1   | 3  | 1  |    |   |    |    |
| JCVIGM_229570_20110307 |      | RNA polymerase sigma factor, sigma-70 family       |  |    |    | 14 |    |    |    |    |     |     | 3   | 24 | 11 | 4  | 1 |    |    |
| JCVIGM_007913_20110307 |      | rubredoxin                                         |  | 3  |    |    |    |    |    |    |     |     |     |    |    |    |   |    |    |
| JCVIGM_057213_20110307 |      | rubredoxin                                         |  |    |    |    | 1  | 2  | 1  |    |     | 2   |     |    |    |    |   |    |    |
| JCVIGM_006262_20110307 |      | rubredoxin/rubrerythrin                            |  |    |    |    |    | 1  | 1  |    |     |     |     |    |    |    |   |    |    |
| JCVIGM_020560_20110307 |      | rubredoxin/rubrerythrin                            |  | 61 | 62 | 22 | 46 | 58 | 68 | 33 | 76  | 101 | 223 | 33 | 15 | 12 | 9 | 50 | 18 |
| JCVIGM_060719_20110307 |      | rubredoxin/rubrerythrin                            |  | 66 | 36 | 36 | 46 | 85 | 75 | 12 | 122 | 20  | 177 | 38 | 19 | 7  | 4 | 29 | 10 |
| JCVIGM_085243_20110307 |      | rubredoxin/rubrerythrin                            |  | 2  | 2  |    | 1  |    |    |    | 2   | 2   | 3   |    |    |    |   |    |    |
| JCVIGM_248144_20110307 |      | rubredoxin/rubrerythrin                            |  | 3  | 6  | 2  | 5  | 5  | 1  | 3  | 4   | 5   | 13  | 4  |    |    |   |    | 3  |
| JCVIGM_401158_20110307 |      | rubredoxin/rubrerythrin                            |  | 3  |    |    | 2  | 1  | 4  |    |     |     | 3   |    |    |    |   |    | 1  |
| JCVIGM_415862_20110307 |      | rubredoxin/rubrerythrin                            |  | 1  | 2  | 2  | 5  | 4  | 4  |    | 1   |     | 1   |    |    | 1  |   |    | 1  |
| JCVIGM_054682_20110307 | rbr  | rubrerythrin                                       |  | 2  |    |    | 2  | 1  |    | 1  | 2   | 2   |     | 1  | 1  | 1  | 1 | 1  | 1  |
| JCVIGM_073521_20110307 |      | rubrerythrin                                       |  | 2  |    |    | 3  |    |    |    |     | 1   |     |    |    |    |   |    |    |
| JCVIGM_091745_20110307 |      | rubrerythrin                                       |  | 3  |    |    | 1  |    |    | 1  | 1   | 3   |     |    |    |    |   |    |    |
| JCVIGM_119026_20110307 |      | rubrerythrin                                       |  | 7  | 4  | 1  | 13 | 14 | 9  | 3  | 6   | 6   | 5   | 1  |    |    |   |    | 6  |
| JCVIGM_127859_20110307 |      | rubrerythrin                                       |  | 1  |    |    |    |    |    |    |     |     |     |    |    |    |   |    |    |
| JCVIGM_283228_20110307 |      | rubrerythrin                                       |  | 2  | 3  | 1  | 2  | 2  | 3  | 3  | 2   | 1   | 2   |    |    |    |   |    | 1  |
| JCVIGM_027483_20110307 | metK | S-adenosylmethionine synthetase, N-terminal domain |  |    |    |    |    |    | 1  |    |     |     |     |    |    |    |   |    |    |
| JCVIGM_031546_20110307 |      | seryl-tRNA synthetase N-terminal domain            |  | 3  |    |    |    |    |    |    |     |     |     |    |    |    |   |    |    |
| JCVIGM_093445_20110307 |      | short-chain dehydrogenase/reductase SDR            |  | 1  |    |    |    | 1  | 1  |    |     |     |     |    |    |    |   |    | 1  |
| JCVIGM_318607_20110307 | ssb  | single-strand binding protein                      |  |    |    |    |    |    | 1  | 1  |     |     |     |    |    |    |   |    |    |
| JCVIGM_437080_20110307 |      | single-stranded DNA-binding protein                |  |    |    |    |    |    |    |    |     | 1   | 1   |    |    |    |   |    |    |



|                        |      |                                               |  |    |   |    |    |     |    |    |    |    |    |    |    |   |   |    |    |
|------------------------|------|-----------------------------------------------|--|----|---|----|----|-----|----|----|----|----|----|----|----|---|---|----|----|
| JCVIGM_431442_20110307 | tsf  | translation elongation factor Ts              |  |    |   | 1  | 1  | 1   |    |    | 1  |    |    | 2  |    | 1 |   | 1  | 1  |
| JCVIGM_026960_20110307 | tuf  | translation elongation factor Tu              |  | 14 |   | 3  | 7  | 2   | 4  | 4  | 11 | 8  |    | 1  | 3  | 4 | 4 | 4  | 10 |
| JCVIGM_029795_20110307 | tuf  | translation elongation factor Tu              |  | 9  |   | 8  | 9  | 10  | 8  | 4  | 10 | 7  |    | 2  | 8  | 2 | 1 | 4  | 8  |
| JCVIGM_109601_20110307 | tuf  | translation elongation factor Tu              |  | 2  |   |    |    |     | 2  |    |    |    |    |    |    |   |   |    |    |
| JCVIGM_124820_20110307 | tuf  | translation elongation factor Tu              |  | 14 | 6 | 48 | 40 | 149 | 81 | 12 | 24 | 11 | 11 | 16 | 18 | 8 | 3 | 14 | 9  |
| JCVIGM_157947_20110307 | tuf  | translation elongation factor Tu              |  |    |   |    |    |     |    |    |    |    |    |    |    |   |   |    |    |
| JCVIGM_166526_20110307 | tufB | translation elongation factor Tu              |  |    |   |    |    |     |    |    |    |    |    |    |    |   |   |    |    |
| JCVIGM_185454_20110307 | tuf  | translation elongation factor Tu              |  |    |   |    |    | 1   | 1  |    |    |    |    |    |    |   |   |    |    |
| JCVIGM_196046_20110307 | tuf  | translation elongation factor Tu              |  | 3  |   |    |    |     |    |    |    | 1  |    |    |    |   |   |    |    |
| JCVIGM_196200_20110307 | tuf  | translation elongation factor Tu              |  |    |   |    |    |     |    |    |    |    |    |    |    |   |   |    |    |
| JCVIGM_205201_20110307 | tuf  | translation elongation factor Tu              |  | 5  |   |    |    |     |    |    |    |    |    |    |    |   |   |    |    |
| JCVIGM_211136_20110307 | tuf  | translation elongation factor Tu              |  |    |   |    |    | 1   | 1  |    |    |    |    |    |    |   |   |    |    |
| JCVIGM_237573_20110307 | tuf  | translation elongation factor Tu              |  | 1  |   | 1  |    |     |    |    |    |    |    |    |    |   |   |    | 1  |
| JCVIGM_249773_20110307 | tuf  | translation elongation factor Tu              |  |    |   |    | 1  |     |    | 1  |    | 1  |    |    |    |   |   |    |    |
| JCVIGM_250936_20110307 | tufB | translation elongation factor Tu              |  |    |   |    |    |     |    |    |    |    | 5  | 11 |    |   | 4 | 3  |    |
| JCVIGM_300774_20110307 | tuf  | translation elongation factor Tu              |  |    |   | 1  |    |     | 1  |    | 1  |    |    |    |    |   |   |    |    |
| JCVIGM_368873_20110307 | tuf  | translation elongation factor Tu              |  | 2  |   | 1  | 2  |     |    |    | 1  |    |    |    |    |   |   |    | 2  |
| JCVIGM_385355_20110307 |      | transposase, IS111A/IS1328/IS1533             |  |    |   |    |    |     |    |    |    |    |    |    |    |   |   |    |    |
| JCVIGM_364669_20110307 |      | TRAP transporter solute receptor, TAXI family |  | 1  |   |    |    |     |    |    |    |    |    |    |    |   |   |    |    |
| JCVIGM_001774_20110307 | tpiA | triose-phosphate isomerase                    |  | 3  |   | 1  | 2  | 2   | 1  | 2  | 2  | 2  | 2  | 1  | 1  | 1 | 1 | 1  | 2  |
| JCVIGM_008332_20110307 | tpiA | triose-phosphate isomerase                    |  | 4  | 4 | 7  | 6  | 4   | 8  | 2  | 3  | 3  | 2  | 2  | 5  | 2 | 3 | 5  | 3  |
| JCVIGM_011008_20110307 | tpiA | triose-phosphate isomerase                    |  |    |   |    | 2  |     | 1  |    |    |    |    | 1  | 1  |   |   |    | 3  |
| JCVIGM_020800_20110307 | tpiA | triose-phosphate isomerase                    |  |    |   |    |    |     |    |    |    |    | 1  |    |    |   |   |    |    |
| JCVIGM_023613_20110307 | tpiA | triose-phosphate isomerase                    |  | 2  |   |    | 1  | 1   | 1  | 2  |    | 1  |    | 1  | 1  |   |   |    | 1  |
| JCVIGM_027321_20110307 | tpiA | triose-phosphate isomerase                    |  | 3  | 2 | 2  | 3  | 6   | 1  | 1  | 2  | 3  | 3  |    |    |   |   |    |    |
| JCVIGM_087250_20110307 | tpiA | triose-phosphate isomerase                    |  | 10 |   | 8  | 7  | 5   | 6  | 2  | 9  | 8  |    | 1  | 6  |   |   | 4  | 6  |
| JCVIGM_115071_20110307 | tpiA | triose-phosphate isomerase                    |  |    |   |    | 1  |     |    |    |    |    |    |    |    |   |   |    |    |
| JCVIGM_135680_20110307 | tpiA | triose-phosphate isomerase                    |  |    |   | 1  |    |     |    |    |    | 1  |    | 1  | 2  |   |   |    | 1  |
| JCVIGM_261662_20110307 | tpiA | triose-phosphate isomerase                    |  | 1  | 1 |    | 1  | 4   | 2  | 4  | 1  | 1  |    |    |    |   |   |    | 1  |
| JCVIGM_302433_20110307 | tpiA | triose-phosphate isomerase                    |  |    |   |    |    |     |    |    | 1  |    |    | 1  |    |   |   | 1  | 7  |

|                        |      |                                                                                         |  |   |   |   |   |   |   |   |   |   |   |   |   |   |  |   |
|------------------------|------|-----------------------------------------------------------------------------------------|--|---|---|---|---|---|---|---|---|---|---|---|---|---|--|---|
| JCVIGM_337367_20110307 | tpiA | triose-phosphate isomerase                                                              |  | 2 | 1 | 3 | 1 | 5 | 1 | 2 | 3 | 2 | 1 | 4 | 3 | 3 |  | 2 |
| JCVIGM_366477_20110307 | tpiA | triose-phosphate isomerase                                                              |  |   |   |   | 2 | 3 | 2 |   | 1 |   |   |   |   |   |  |   |
| JCVIGM_114128_20110307 |      | tRNA methyl transferase                                                                 |  |   |   |   |   |   |   |   | 1 | 1 |   |   |   |   |  |   |
| JCVIGM_117733_20110307 |      | two-component system sensor histidine kinase, with a response regulator receiver domain |  |   |   |   |   |   |   | 1 |   | 1 |   |   |   |   |  |   |
| JCVIGM_373409_20110307 |      | type III restriction protein                                                            |  | 1 |   |   |   |   |   |   |   |   |   |   |   |   |  |   |
| JCVIGM_014974_20110307 | galE | UDP-glucose 4-epimerase                                                                 |  |   |   | 1 | 1 |   |   |   |   | 2 |   |   | 1 |   |  |   |
| JCVIGM_179048_20110307 | murE | UDP-N-acetylmuramoyl-L-alanyl-D-glutamate--2,6-diaminopimelate ligase                   |  |   |   |   |   |   |   |   |   |   |   | 1 |   | 2 |  |   |
| JCVIGM_240853_20110307 | uspA | universal stress protein A                                                              |  |   |   |   |   |   |   |   |   |   |   |   |   |   |  |   |
| JCVIGM_311901_20110307 |      | UPF0210 protein DORLON_00661                                                            |  |   |   |   | 1 |   | 1 |   |   |   |   |   |   |   |  |   |
| JCVIGM_044460_20110307 |      | UTP--hexose-1-phosphate uridylyltransferase                                             |  | 4 | 1 |   | 2 | 2 | 3 |   | 3 | 1 | 3 |   |   |   |  | 4 |
| JCVIGM_148949_20110307 | pepD | Xaa-His dipeptidase                                                                     |  | 2 |   |   |   |   |   |   |   |   |   |   |   |   |  |   |
| JCVIGM_195935_20110307 |      | xylose ABC transporter substrate-binding protein                                        |  |   |   |   |   |   |   |   |   |   |   |   |   |   |  |   |
| JCVIGM_086248_20110307 | xylA | xylose isomerase                                                                        |  |   |   | 2 | 1 |   |   |   |   |   |   |   |   |   |  | 1 |
| JCVIGM_113241_20110307 | xylA | xylose isomerase                                                                        |  |   |   | 3 |   |   |   |   |   |   |   |   |   |   |  | 1 |
| JCVIGM_120909_20110307 | xylA | xylose isomerase                                                                        |  |   |   | 1 |   |   |   |   |   |   |   |   |   |   |  | 1 |
| JCVIGM_229108_20110307 |      | YjeF N-terminal domain protein                                                          |  |   |   |   |   |   |   |   |   | 1 |   | 1 |   |   |  |   |





|            |      |                                                       |   |  |  |  |  |  |   |  |   |  |  |  |  |   |   |   |    |   |   |
|------------|------|-------------------------------------------------------|---|--|--|--|--|--|---|--|---|--|--|--|--|---|---|---|----|---|---|
| STM14_1694 |      | translocation machinery component                     | X |  |  |  |  |  |   |  |   |  |  |  |  |   |   |   |    |   |   |
| STM14_1729 | sodB | superoxide dismutase                                  |   |  |  |  |  |  |   |  |   |  |  |  |  | 1 |   | 1 | 3  |   |   |
| STM14_1898 | nmpC | putative outer membrane porin precursor               |   |  |  |  |  |  |   |  |   |  |  |  |  | 1 |   |   |    |   |   |
| STM14_2095 | ompW | outer membrane protein W                              |   |  |  |  |  |  |   |  |   |  |  |  |  |   | 1 |   |    |   |   |
| STM14_2113 | adhE | bifunctional acetaldehyde-CoA/alcohol dehydrogenase   |   |  |  |  |  |  |   |  |   |  |  |  |  |   |   |   | 2  |   |   |
| STM14_2133 |      | hypothetical protein                                  |   |  |  |  |  |  |   |  |   |  |  |  |  |   |   |   | 2  |   |   |
| STM14_2312 | aspS | aspartyl-tRNA synthetase                              |   |  |  |  |  |  |   |  |   |  |  |  |  |   |   |   | 1  |   |   |
| STM14_2353 | ftn  | ferritin                                              |   |  |  |  |  |  |   |  |   |  |  |  |  |   |   |   |    |   |   |
| STM14_2378 | fliC | flagellin                                             |   |  |  |  |  |  |   |  |   |  |  |  |  |   |   |   |    |   |   |
| STM14_2514 | cbij | cobalt-precorrin-6x reductase                         |   |  |  |  |  |  |   |  |   |  |  |  |  |   |   |   |    |   |   |
| STM14_2531 | pduE | propanediol dehydratase small subunit                 |   |  |  |  |  |  |   |  |   |  |  |  |  | 1 |   |   |    |   |   |
| STM14_2534 | pduJ | polyhedral body protein                               |   |  |  |  |  |  | 1 |  | 1 |  |  |  |  |   |   |   |    |   |   |
| STM14_2538 | pduN | polyhedral body protein                               | X |  |  |  |  |  |   |  |   |  |  |  |  |   |   |   |    |   |   |
| STM14_2584 | rfbH | CDP-6-deoxy-D-xylo-4-hexulose-3-dehydrase             |   |  |  |  |  |  |   |  |   |  |  |  |  |   |   |   |    |   |   |
| STM14_2625 | yegN | multidrug efflux system subunit MdtB                  |   |  |  |  |  |  |   |  |   |  |  |  |  | 1 |   | 1 |    |   |   |
| STM14_2719 | yehH | putative inner membrane protein                       | X |  |  |  |  |  |   |  |   |  |  |  |  |   |   |   |    |   |   |
| STM14_2817 | glpQ | glycerophosphodiester phosphodiesterase               |   |  |  |  |  |  |   |  |   |  |  |  |  |   |   |   | 2  |   |   |
| STM14_2857 | nuoN | NADH dehydrogenase subunit N                          | X |  |  |  |  |  |   |  |   |  |  |  |  |   |   |   |    |   |   |
| STM14_2949 | pgtC | phosphoglycerate transport regulatory protein precurs | X |  |  |  |  |  |   |  |   |  |  |  |  |   |   |   |    |   |   |
| STM14_2990 | ptsI | phosphoenolpyruvate-protein phosphotransferase        |   |  |  |  |  |  | 1 |  |   |  |  |  |  |   |   |   | 2  |   |   |
| STM14_2991 | crr  | glucose-specific PTS system component                 |   |  |  |  |  |  |   |  |   |  |  |  |  |   |   |   | 1  | 1 |   |
| STM14_3014 | eutL | putative carboxysome structural protein               |   |  |  |  |  |  |   |  |   |  |  |  |  |   |   |   | 1  |   |   |
| STM14_3023 | eutM | putative detox protein                                |   |  |  |  |  |  |   |  |   |  |  |  |  | 1 |   |   |    |   |   |
| STM14_3031 | maeB | malic enzyme                                          |   |  |  |  |  |  |   |  |   |  |  |  |  |   |   |   |    |   |   |
| STM14_3052 | dapA | dihydrodipicolinate synthase                          |   |  |  |  |  |  |   |  |   |  |  |  |  |   |   |   |    |   |   |
| STM14_3091 | yfgL | outer membrane protein assembly complex subunit YfgL  |   |  |  |  |  |  |   |  |   |  |  |  |  |   |   |   | 1  | 2 | 2 |
| STM14_3111 | pepB | aminopeptidase B                                      |   |  |  |  |  |  |   |  |   |  |  |  |  |   |   |   |    | 1 |   |
| STM14_3159 | recO | DNA repair protein RecO                               | X |  |  |  |  |  |   |  |   |  |  |  |  |   |   |   |    |   |   |
| STM14_3261 | clpB | protein disaggregation chaperone                      |   |  |  |  |  |  |   |  |   |  |  |  |  |   |   |   |    |   |   |
| STM14_3365 |      | hypothetical protein                                  |   |  |  |  |  |  |   |  |   |  |  |  |  | 1 |   |   |    | 2 |   |
| STM14_3425 | srID | sorbitol-6-phosphate dehydrogenase                    |   |  |  |  |  |  |   |  |   |  |  |  |  |   |   |   |    |   |   |
| STM14_3557 | eno  | phosphopyruvate hydratase                             |   |  |  |  |  |  |   |  |   |  |  |  |  |   |   |   |    | 1 |   |
| STM14_3587 | fucA | L-fucose phosphate aldolase                           | X |  |  |  |  |  |   |  |   |  |  |  |  |   |   |   | 2  |   |   |
| STM14_3590 | fucI | L-fucose isomerase                                    |   |  |  |  |  |  |   |  |   |  |  |  |  |   |   |   | 15 | 3 | 3 |





|            |      |                                                        |  |  |  |  |  |   |  |  |  |  |  |  |  |  |  |  |   |  |
|------------|------|--------------------------------------------------------|--|--|--|--|--|---|--|--|--|--|--|--|--|--|--|--|---|--|
| STM14_5487 | deoC | deoxyribose-phosphate aldolase                         |  |  |  |  |  |   |  |  |  |  |  |  |  |  |  |  | 1 |  |
| STM14_5490 | deoD | purine nucleoside phosphorylase                        |  |  |  |  |  |   |  |  |  |  |  |  |  |  |  |  |   |  |
| STM14_5502 | yjJK | putative ABC transporter ATP-binding protein           |  |  |  |  |  | 1 |  |  |  |  |  |  |  |  |  |  |   |  |
| STM14_931  | moaB | molybdopterin biosynthetic protein B                   |  |  |  |  |  |   |  |  |  |  |  |  |  |  |  |  | 2 |  |
| STM14_966  | dps  | DNA starvation/stationary phase protection protein Dps |  |  |  |  |  |   |  |  |  |  |  |  |  |  |  |  |   |  |

|            |             |                                                     |                                   |        | Biological replicate 2-a |   |   |   |    |    |    |    |          |   |   |    |    |    |    |    |
|------------|-------------|-----------------------------------------------------|-----------------------------------|--------|--------------------------|---|---|---|----|----|----|----|----------|---|---|----|----|----|----|----|
|            |             |                                                     |                                   |        | CONTROL                  |   |   |   |    |    |    |    | INFECTED |   |   |    |    |    |    |    |
| Reference  | Gene symbol | Protein description                                 | Few (<= 10) previous observations | DAY -> | -1                       | 1 | 3 | 6 | 10 | 14 | 21 | 28 | -1       | 1 | 3 | 6  | 10 | 14 | 21 | 28 |
| ORF04041   |             | 2-dehydro-3-deoxy-6-phosphogalactonate aldolase     |                                   |        |                          |   |   |   |    |    |    |    |          |   | 4 |    |    | 2  | 1  |    |
| ORF04923   |             | hypothetical protein                                |                                   |        |                          |   |   |   |    |    |    |    |          |   |   |    |    |    |    |    |
| STM14_0013 | dnaK        | molecular chaperone DnaK                            |                                   |        | 1                        |   |   | 1 |    |    |    |    | 1        |   |   | 1  |    |    |    | 1  |
| STM14_0121 | araA        | L-arabinose isomerase                               |                                   |        |                          |   |   |   |    |    |    |    |          |   |   |    |    |    |    |    |
| STM14_0248 | dgt         | deoxyguanosinetriphosphate triphosphohydrolase      |                                   |        |                          |   |   |   |    |    |    |    |          |   |   |    |    |    |    |    |
| STM14_0266 | yaeT        | outer membrane protein assembly factor YaeT         |                                   |        |                          |   |   |   |    |    |    |    |          |   |   | 1  |    |    |    |    |
| STM14_0287 | metQ        | DL-methionine transporter substrate-binding subunit |                                   |        |                          |   |   |   |    |    |    |    |          |   |   |    |    | 1  |    |    |
| STM14_0476 |             | putative thiol-alkyl hydroperoxide reductase        |                                   |        |                          |   |   |   |    |    |    |    |          |   | 2 |    |    |    |    | 1  |
| STM14_0489 | tsx         | nucleoside channel                                  |                                   |        |                          |   |   |   |    |    |    |    |          |   |   | 1  |    |    |    |    |
| STM14_0600 | sfbA        | putative ABC-type transport system ATPase component |                                   |        |                          |   |   |   |    |    |    |    |          |   |   |    |    |    |    |    |
| STM14_0614 | ybbY        | putative purine permease YbbY                       |                                   |        |                          |   |   |   |    |    |    |    |          |   |   |    |    |    |    |    |
| STM14_0674 | nfnB        | dihydropteridine reductase                          |                                   |        |                          |   |   |   |    |    |    |    |          |   |   |    |    |    |    |    |
| STM14_0689 | fepG        | iron-enterobactin transporter permease              |                                   |        |                          |   |   |   |    |    |    | 1  |          |   |   |    |    |    |    |    |
| STM14_0707 | ahpC        | alkyl hydroperoxide reductase subunit C             |                                   |        |                          |   |   |   |    |    |    |    |          |   | 1 | 3  | 1  | 4  | 11 |    |
| STM14_0756 |             | hypothetical protein                                |                                   |        |                          |   |   |   |    |    |    |    |          |   |   |    |    |    |    |    |
| STM14_0810 | fidA        | flavodoxin FldA                                     |                                   |        |                          |   |   |   |    |    |    |    |          |   |   |    |    |    |    |    |
| STM14_0871 | pal         | peptidoglycan-associated outer membrane lipoprotein |                                   |        |                          |   |   |   |    |    |    |    |          |   |   |    |    |    |    | 1  |
| STM14_0906 |             | hypothetical protein                                |                                   | X      |                          |   |   |   |    |    |    |    |          |   |   |    |    |    |    |    |
| STM14_1084 | ftsK        | DNA translocase FtsK                                |                                   |        |                          |   |   |   |    |    |    |    |          |   |   |    |    |    |    |    |
| STM14_1099 | pflB        | pyruvate formate lyase I                            |                                   |        | 1                        |   |   | 1 | 1  | 2  | 1  | 1  | 2        | 1 |   | 4  |    | 1  | 3  |    |
| STM14_1105 | serC        | phosphoserine aminotransferase                      |                                   |        |                          |   |   |   |    |    |    |    |          |   |   |    |    |    |    | 1  |
| STM14_1110 | rpsA        | 30S ribosomal protein S1                            |                                   |        |                          |   |   |   |    |    |    |    |          |   |   |    |    |    |    |    |
| STM14_1176 |             | minor tail protein                                  |                                   | X      | 1                        |   |   |   |    | 1  |    |    |          |   |   |    |    |    |    |    |
| STM14_1214 | ompA        | outer membrane protein A                            |                                   |        |                          |   |   |   |    |    |    |    |          |   | 5 | 10 |    | 5  | 2  |    |











|            |      |                                                       |   |  |  |   |   |   |   |   |   |   |   |   |    |    |    |    |    |    |   |   |
|------------|------|-------------------------------------------------------|---|--|--|---|---|---|---|---|---|---|---|---|----|----|----|----|----|----|---|---|
| STM14_1099 | pflB | pyruvate formate lyase I                              |   |  |  | 3 | 3 | 1 | 2 | 5 | 2 | 2 | 3 | 2 | 3  | 4  | 10 | 2  | 5  | 7  | 2 |   |
| STM14_1105 | serC | phosphoserine aminotransferase                        |   |  |  |   |   |   |   |   |   |   | 1 |   |    |    |    |    |    |    |   |   |
| STM14_1110 | rpsA | 30S ribosomal protein S1                              |   |  |  | 3 |   |   |   |   |   |   |   |   |    |    |    |    |    |    |   |   |
| STM14_1176 |      | minor tail protein                                    | X |  |  |   |   |   |   |   |   |   |   |   |    |    |    |    |    |    |   |   |
| STM14_1214 | ompA | outer membrane protein A                              |   |  |  |   |   |   |   |   |   |   |   |   | 14 | 29 | 7  | 3  | 11 |    |   |   |
| STM14_1565 | gapA | glyceraldehyde-3-phosphate dehydrogenase              |   |  |  | 1 |   | 1 | 3 |   |   | 1 | 1 | 2 |    | 19 | 8  | 26 | 20 | 36 | 2 |   |
| STM14_1577 | gdhA | glutamate dehydrogenase                               |   |  |  | 6 | 4 | 3 | 4 | 5 | 2 | 2 | 4 | 4 | 3  | 4  | 2  | 3  | 1  | 4  | 5 |   |
| STM14_1670 | lppB | putative methyl-accepting chemotaxis protein          |   |  |  |   |   |   |   |   |   |   |   |   |    | 3  | 21 | 5  | 5  | 7  |   |   |
| STM14_1671 | lpp  | murein lipoprotein                                    |   |  |  |   |   |   |   |   |   |   |   |   |    | 2  | 16 | 4  | 4  | 5  |   |   |
| STM14_1672 | pykF | pyruvate kinase                                       |   |  |  |   |   |   |   |   |   |   |   |   |    | 3  | 5  |    | 2  | 3  |   |   |
| STM14_1694 |      | translocation machinery component                     | X |  |  |   |   |   | 2 |   |   |   |   |   |    |    |    |    | 1  |    |   |   |
| STM14_1729 | sodB | superoxide dismutase                                  |   |  |  |   |   |   |   |   |   |   |   |   |    | 2  | 1  | 2  | 2  | 1  |   |   |
| STM14_1898 | nmpC | putative outer membrane porin precursor               |   |  |  |   |   |   |   |   |   |   |   |   |    |    |    |    |    |    |   |   |
| STM14_2095 | ompW | outer membrane protein W                              |   |  |  |   |   |   |   |   |   |   |   |   |    | 1  | 3  | 1  |    | 2  |   |   |
| STM14_2113 | adhE | bifunctional acetaldehyde-CoA/alcohol dehydrogenase   |   |  |  |   |   |   |   |   |   |   |   |   |    |    |    |    |    |    |   |   |
| STM14_2133 |      | hypothetical protein                                  |   |  |  |   |   |   |   |   |   |   |   |   |    |    |    |    |    |    |   |   |
| STM14_2312 | aspS | aspartyl-tRNA synthetase                              |   |  |  |   |   |   |   |   |   |   |   |   |    |    | 2  |    |    |    | 4 |   |
| STM14_2353 | ftn  | ferritin                                              |   |  |  |   |   |   |   |   |   |   |   |   |    | 2  | 2  |    | 1  | 4  |   |   |
| STM14_2378 | fliC | flagellin                                             |   |  |  | 1 |   |   |   |   |   |   |   |   |    |    | 2  |    | 1  |    | 1 |   |
| STM14_2514 | cbiJ | cobalt-precorrin-6x reductase                         |   |  |  |   | 1 |   |   |   |   |   |   |   | 1  | 1  |    |    |    |    |   |   |
| STM14_2531 | pduE | propanediol dehydratase small subunit                 |   |  |  |   | 2 |   |   |   |   |   |   |   |    |    |    |    |    |    |   |   |
| STM14_2534 | pduJ | polyhedral body protein                               |   |  |  | 4 | 3 | 1 | 4 | 5 | 3 | 3 | 5 | 9 | 5  | 1  |    |    |    |    | 4 | 2 |
| STM14_2538 | pduN | polyhedral body protein                               | X |  |  | 1 |   |   |   | 2 |   |   |   |   |    |    |    |    |    | 2  |   |   |
| STM14_2584 | rfbH | CDP-6-deoxy-D-xylo-4-hexulose-3-dehydrase             |   |  |  |   |   |   |   |   |   |   |   |   |    |    |    |    | 1  | 1  | 1 |   |
| STM14_2625 | yegN | multidrug efflux system subunit MdtB                  |   |  |  |   |   |   |   |   |   |   |   |   |    |    |    |    |    |    |   |   |
| STM14_2719 | yeiH | putative inner membrane protein                       | X |  |  |   |   |   |   |   |   |   |   |   |    |    |    |    |    |    |   |   |
| STM14_2817 | glpQ | glycerophosphodiester phosphodiesterase               |   |  |  |   |   |   |   |   |   |   |   |   |    |    |    |    |    |    |   |   |
| STM14_2857 | nuoN | NADH dehydrogenase subunit N                          | X |  |  |   |   |   | 1 |   |   |   |   |   |    |    |    |    |    |    | 1 |   |
| STM14_2949 | pgtC | phosphoglycerate transport regulatory protein precurs | X |  |  |   |   |   |   | 2 |   | 1 |   |   |    |    |    |    |    |    |   |   |
| STM14_2990 | ptsI | phosphoenolpyruvate-protein phosphotransferase        |   |  |  |   |   |   |   |   |   |   |   |   |    |    |    |    |    | 1  |   |   |
| STM14_2991 | crr  | glucose-specific PTS system component                 |   |  |  |   |   |   |   |   |   |   |   |   |    |    |    |    |    | 1  |   |   |
| STM14_3014 | eutL | putative carboxysome structural protein               |   |  |  |   |   |   |   |   |   |   |   |   |    |    |    |    |    | 1  |   |   |
| STM14_3023 | eutM | putative detox protein                                |   |  |  | 2 | 2 | 1 | 2 | 1 |   | 1 | 4 | 2 | 5  | 4  | 1  | 2  | 1  | 4  |   |   |
| STM14_3031 | maeB | malic enzyme                                          |   |  |  |   |   |   |   |   |   |   |   |   |    |    | 1  | 1  |    |    |   |   |



|            |       |                                             |   |  |   |   |   |   |   |   |   |   |    |    |    |   |    |    |    |   |
|------------|-------|---------------------------------------------|---|--|---|---|---|---|---|---|---|---|----|----|----|---|----|----|----|---|
| STM14_4149 | tuf_1 | elongation factor Tu                        |   |  |   |   |   |   |   |   |   |   | 14 | 49 |    |   | 9  | 9  |    |   |
| STM14_4150 | fusA  | elongation factor G                         |   |  | 3 | 1 |   | 1 |   | 4 | 1 | 4 | 2  | 2  | 4  | 8 | 2  | 2  | 5  |   |
| STM14_4188 | bigA  | putative surface-exposed virulence protein  | X |  | 1 |   |   |   | 1 |   |   |   |    |    |    |   |    |    |    |   |
| STM14_4215 | pckA  | phosphoenolpyruvate carboxykinase           |   |  | 6 | 2 | 2 | 8 | 3 | 5 | 4 | 5 | 6  | 4  | 9  | 7 | 3  | 5  | 12 | 3 |
| STM14_4232 | malP  | maltodextrin phosphorylase                  |   |  | 2 |   |   | 2 | 2 |   |   |   |    |    |    |   |    |    |    |   |
| STM14_4320 | uspA  | universal stress protein A                  |   |  |   |   |   |   |   |   |   |   |    |    |    |   |    |    |    |   |
| STM14_4328 |       | putative L-asparaginase                     |   |  |   |   |   |   |   |   |   |   |    | 3  |    |   | 2  | 1  |    |   |
| STM14_4331 |       | putative phosphosugar isomerase             |   |  |   |   |   |   |   |   |   |   |    | 7  | 2  |   |    |    | 5  |   |
| STM14_4443 | mtlA  | mannitol-specific enzyme IIABC component    |   |  |   |   |   |   |   |   |   |   |    | 2  |    | 3 | 1  | 7  |    |   |
| STM14_4464 | pmgl  | phosphoglyceromutase                        |   |  |   |   |   |   |   |   |   |   |    | 3  | 1  |   | 1  | 1  |    |   |
| STM14_4620 | dgoA  | D-galactonate dehydratase                   | X |  |   |   |   |   |   |   |   |   |    | 27 | 7  | 6 | 9  | 27 |    |   |
| STM14_4674 | asnA  | asparagine synthetase AsnA                  |   |  |   | 1 |   |   | 2 |   |   |   | 1  |    |    |   |    |    |    |   |
| STM14_4681 | rbsB  | D-ribose transporter subunit RbsB           |   |  |   |   |   |   |   |   |   |   |    | 1  |    |   |    |    |    |   |
| STM14_4698 | ilvG  | acetolactate synthase 2 catalytic subunit   |   |  |   |   |   |   |   |   |   | 1 |    | 2  |    |   |    |    |    |   |
| STM14_4700 | ilvE  | branched-chain amino acid aminotransferase  |   |  |   |   |   |   |   |   |   |   |    |    |    |   |    | 1  |    |   |
| STM14_4701 | ilvD  | dihydroxy-acid dehydratase                  |   |  |   |   |   |   |   |   |   |   |    |    |    |   |    |    |    |   |
| STM14_4713 | trxA  | thioredoxin                                 |   |  |   |   |   |   |   |   |   |   |    | 1  |    | 1 | 2  |    |    |   |
| STM14_4790 | pepQ  | proline dipeptidase                         |   |  |   |   |   |   |   |   |   |   |    |    |    |   |    |    | 1  |   |
| STM14_4806 | dsbA  | periplasmic protein disulfide isomerase I   |   |  |   |   |   |   |   |   |   |   |    |    |    |   | 1  |    |    |   |
| STM14_4852 | fdoG  | formate dehydrogenase alpha subunit         | X |  |   |   |   |   |   |   |   |   |    |    | 4  |   |    |    |    |   |
| STM14_4902 | yneA  | putative sugar transport protein            |   |  |   |   |   |   |   |   |   |   |    |    | 2  |   |    |    |    |   |
| STM14_4906 | tpiA  | triosephosphate isomerase                   |   |  | 3 |   | 2 | 3 |   | 2 | 2 | 3 | 3  |    | 3  | 4 | 2  | 3  | 11 | 3 |
| STM14_4936 | katG  | hydroperoxidase                             |   |  |   |   |   |   |   |   |   |   |    | 2  | 9  | 2 | 6  | 12 |    |   |
| STM14_4940 | talC  | fructose-6-phosphate aldolase               |   |  |   |   |   |   |   |   |   |   |    | 1  | 1  |   |    |    | 1  |   |
| STM14_4986 | rplK  | 50S ribosomal protein L11                   |   |  | 1 | 1 | 3 | 4 | 3 | 3 | 4 | 2 | 2  | 6  | 5  |   | 3  | 2  | 3  |   |
| STM14_4988 | rplJ  | 50S ribosomal protein L10                   |   |  |   |   |   |   |   |   |   |   |    | 4  | 4  | 3 | 4  | 6  |    |   |
| STM14_4989 | rplL  | 50S ribosomal protein L7/L12                |   |  |   |   |   |   |   |   |   |   |    |    | 1  |   |    |    | 94 |   |
| STM14_4990 | rpoB  | DNA-directed RNA polymerase subunit beta    |   |  |   |   |   |   |   |   |   |   |    |    |    |   |    |    |    |   |
| STM14_5075 | pgi   | glucose-6-phosphate isomerase               |   |  |   |   |   |   |   |   |   |   |    | 2  | 2  | 1 | 2  | 6  |    |   |
| STM14_5080 | yjbA  | phosphate-starvation-inducible protein PsiE | X |  | 1 |   |   | 2 |   | 1 |   | 1 |    | 2  |    |   |    |    |    |   |
| STM14_5085 | malE  | maltose ABC transporter periplasmic protein |   |  |   |   |   |   |   |   |   | 1 |    | 7  | 9  | 6 | 4  | 12 |    |   |
| STM14_5114 | ssb   | single-strand DNA-binding protein           |   |  |   |   |   |   |   |   |   |   |    | 1  |    |   |    |    | 1  |   |
| STM14_5202 | aspA  | aspartate ammonia-lyase                     |   |  |   |   |   |   |   |   |   |   |    | 8  | 19 | 9 | 10 | 13 |    |   |
| STM14_5207 | groEL | chaperonin GroEL                            |   |  | 1 |   | 1 |   |   |   |   |   |    | 4  | 10 | 5 | 3  |    |    |   |

|            |      |                                                        |   |  |  |   |  |   |   |   |   |   |   |   |   |  |  |    |   |   |   |   |
|------------|------|--------------------------------------------------------|---|--|--|---|--|---|---|---|---|---|---|---|---|--|--|----|---|---|---|---|
| STM14_5223 | frdA | fumarate reductase flavoprotein subunit                |   |  |  |   |  |   |   |   |   |   |   |   |   |  |  | 1  |   | 1 |   |   |
| STM14_5244 | hflK | FtsH protease regulator HflK                           |   |  |  | 1 |  |   | 1 |   |   |   |   |   |   |  |  |    |   |   |   |   |
| STM14_5253 | yjfJ | putative phage shock protein A                         | X |  |  |   |  |   | 1 |   |   |   |   |   |   |  |  |    |   |   |   |   |
| STM14_5270 | sgaE | L-ribulose-5-phosphate 4-epimerase                     | X |  |  | 1 |  |   |   |   |   | 1 |   |   |   |  |  |    |   |   |   |   |
| STM14_5301 | ppa  | inorganic pyrophosphatase                              |   |  |  |   |  |   |   |   |   |   |   |   |   |  |  | 3  | 2 | 1 | 1 | 3 |
| STM14_5317 |      | putative dehydrogenase                                 | X |  |  |   |  |   |   |   |   |   |   |   |   |  |  | 3  |   | 1 |   |   |
| STM14_5327 |      | putative endonuclease                                  | X |  |  | 1 |  | 1 | 1 | 1 | 1 |   |   |   |   |  |  |    |   |   | 1 | 3 |
| STM14_5358 |      | ornithine carbamoyltransferase                         | X |  |  | 1 |  | 1 | 1 | 3 | 1 | 1 | 2 | 2 | 1 |  |  |    | 2 |   |   |   |
| STM14_5373 | pepA | leucyl aminopeptidase                                  |   |  |  |   |  |   |   |   |   |   |   | 1 |   |  |  |    |   | 1 |   |   |
| STM14_5419 | iadA | isoaspartyl dipeptidase                                |   |  |  |   |  |   |   |   |   |   |   |   |   |  |  | 3  | 2 |   |   | 6 |
| STM14_5487 | deoC | deoxyribose-phosphate aldolase                         |   |  |  |   |  |   |   |   |   |   |   |   |   |  |  | 4  | 8 | 1 | 1 | 3 |
| STM14_5490 | deoD | purine nucleoside phosphorylase                        |   |  |  |   |  |   |   |   |   |   |   |   |   |  |  | 3  | 2 | 2 | 2 | 2 |
| STM14_5502 | yjjK | putative ABC transporter ATP-binding protein           |   |  |  |   |  |   |   |   |   |   |   |   |   |  |  |    |   |   |   |   |
| STM14_931  | moaB | molybdopterin biosynthetic protein B                   |   |  |  |   |  |   |   |   |   |   |   |   |   |  |  |    |   |   |   |   |
| STM14_966  | dps  | DNA starvation/stationary phase protection protein Dps |   |  |  |   |  |   |   |   |   |   |   |   |   |  |  |    |   |   |   |   |
|            |      |                                                        |   |  |  |   |  |   |   |   |   |   |   |   |   |  |  | 12 | 2 | 2 |   |   |
