# Supplementary material for: A Multi-Omic View of Host-Pathogen-Commensal Interplay in Salmonella-Mediated Intestinal Infection
Source: PubMed Central journal article supplement (PMC3694140; doi:10.1371/journal.pone.0067155), 2013-06-26
Supplement: pone.0067155.s010.pdf [file pone.0067155.s010.pdf]

**Table S3. Proteins found to be statistically significantly different in control and infected mice.**

| <b>Commensal Proteins</b> |                                                                       |
|---------------------------|-----------------------------------------------------------------------|
| Protein                   | Protein description                                                   |
| JCVIGM_226856_20110307    | ribosomal protein L10                                                 |
| JCVIGM_229762_20110307    | major outer membrane lipoprotein 1                                    |
| JCVIGM_210946_20110307    | hypothetical protein                                                  |
| JCVIGM_022560_20110307    | hypothetical protein                                                  |
| JCVIGM_260954_20110307    | phosphoglycerate kinase                                               |
| JCVIGM_118473_20110307    | formate--tetrahydrofolate ligase                                      |
| JCVIGM_060468_20110307    | hypothetical protein                                                  |
| JCVIGM_307765_20110307    | hypothetical protein                                                  |
| JCVIGM_369484_20110307    | hypothetical protein                                                  |
| JCVIGM_360038_20110307    | 2-hydroxy-3-oxopropionate reductase                                   |
| JCVIGM_108298_20110307    | phosphoenolpyruvate carboxykinase (ATP)                               |
| JCVIGM_260432_20110307    | phosphoglycerate kinase                                               |
| JCVIGM_360253_20110307    | glyceraldehyde 3-phosphate dehydrogenase, C-terminal domain           |
| JCVIGM_037673_20110307    | 3-hydroxybutyryl-coA dehydrogenase                                    |
| JCVIGM_055645_20110307    | carbohydrate ABC transporter substrate-binding protein, CUT1 family   |
| JCVIGM_118383_20110307    | hypothetical protein                                                  |
| JCVIGM_181280_20110307    | B12 binding domain                                                    |
| JCVIGM_054434_20110307    | arabinogalactan endo-1,4-beta-galactosidase                           |
| JCVIGM_045961_20110307    | ribosomal protein L2                                                  |
| JCVIGM_104408_20110307    | hypothetical protein                                                  |
| JCVIGM_291424_20110307    | hypothetical protein                                                  |
| JCVIGM_062252_20110307    | ketose-bisphosphate aldolase, class II                                |
| JCVIGM_213960_20110307    | chaperone protein dnaK                                                |
| JCVIGM_087474_20110307    | fructose-1,6-bisphosphate aldolase, class II                          |
| JCVIGM_045263_20110307    | extracellular solute-binding protein family 1                         |
| JCVIGM_194741_20110307    | putative uncharacterized protein (fragment)                           |
| JCVIGM_244599_20110307    | purine nucleoside phosphorylase deoD-type                             |
| JCVIGM_393651_20110307    | RNA polymerase sigma factor                                           |
| JCVIGM_184954_20110307    | integral membrane sensor signal transduction histidine kinase         |
| JCVIGM_057213_20110307    | rubredoxin                                                            |
| JCVIGM_123964_20110307    | formate--tetrahydrofolate ligase                                      |
| JCVIGM_027321_20110307    | triose-phosphate isomerase                                            |
| JCVIGM_188817_20110307    | monosaccharide ABC transporter substrate-binding protein, CUT2 family |
| JCVIGM_079110_20110307    | malate dehydrogenase (oxaloacetate-decarboxylating)                   |
| JCVIGM_083913_20110307    | electron transfer flavoprotein, beta subunit                          |
| JCVIGM_294702_20110307    | glycerol dehydratase large subunit                                    |
| JCVIGM_083011_20110307    | glyceraldehyde 3-phosphate dehydrogenase, C-terminal domain           |
| JCVIGM_197130_20110307    | ABC-type xylose transport system, periplasmic component               |
| JCVIGM_177955_20110307    | flagellin fliC2                                                       |

|                        |                                                             |
|------------------------|-------------------------------------------------------------|
| JCVIGM_036678_20110307 | hypothetical protein                                        |
| JCVIGM_189834_20110307 | phosphopyruvate hydratase                                   |
| JCVIGM_030295_20110307 | ompA family protein                                         |
| JCVIGM_168776_20110307 | L-arabinose isomerase                                       |
| JCVIGM_101296_20110307 | acetyl-coA C-acetyltransferase                              |
| JCVIGM_189194_20110307 | glyceraldehyde 3-phosphate dehydrogenase, C-terminal domain |
| JCVIGM_081547_20110307 | glutamate dehydrogenase, NADP-specific                      |

| <b>Salmonella proteins</b> |                                                                                                |
|----------------------------|------------------------------------------------------------------------------------------------|
| Dataset                    | Description                                                                                    |
| STM14_4988                 | rplJ 50S ribosomal protein L10                                                                 |
| STM14_3750                 | ansB L-asparaginase II                                                                         |
| STM14_5085                 | malE maltose ABC transporter periplasmic protein                                               |
| STM14_3811                 | hybC hydrogenase 2 large subunit                                                               |
| STM14_1671                 | lpp murein lipoprotein                                                                         |
| STM14_1729                 | sodB superoxide dismutase                                                                      |
| STM14_1670                 | lppB putative methyl-accepting chemotaxis protein                                              |
| STM14_1214                 | ompA outer membrane protein A                                                                  |
| STM14_5301                 | ppa inorganic pyrophosphatase                                                                  |
| STM14_1672                 | pykF pyruvate kinase                                                                           |
| STM14_3709                 | pgk phosphoglycerate kinase                                                                    |
| STM14_5202                 | aspA aspartate ammonia-lyase                                                                   |
| STM14_3708                 | fba fructose-bisphosphate aldolase                                                             |
| STM14_4713                 | trxA thioredoxin                                                                               |
| STM14_4331                 | putative phosphosugar isomerase                                                                |
| STM14_4936                 | katG hydroperoxidase                                                                           |
| STM14_5075                 | pgi glucose-6-phosphate isomerase                                                              |
| STM14_3590                 | fucl L-fucose isomerase                                                                        |
| STM14_1565                 | gapA glyceraldehyde-3-phosphate dehydrogenase                                                  |
| STM14_4620                 | dgoA 2-oxo-3-deoxygalactonate 6-phosphate aldolase/galacto                                     |
| STM14_4464                 | pmgI phosphoglyceromutase                                                                      |
| STM14_5490                 | deoD purine nucleoside phosphorylase                                                           |
| STM14_2353                 | ftn ferritin                                                                                   |
| STM14_3930                 | garR tartronate semialdehyde reductase                                                         |
| STM14_0707                 | ahpC alkyl hydroperoxide reductase subunit C                                                   |
| ORF04041                   | 2-dehydro-3-deoxy-6-phosphogalactonate aldolase (6-phospho-2-dehydro-3-deoxygalactonate aldola |
| STM14_2095                 | ompW outer membrane protein W                                                                  |
| STM14_3931                 | garL alpha-dehydro-beta-deoxy-D-glucarate aldolase                                             |
| STM14_4052                 | mdh malate dehydrogenase                                                                       |
| STM14_4129                 | rpsH 30S ribosomal protein S8                                                                  |
| STM14_5207                 | groEL chaperonin GroEL                                                                         |
| STM14_4149                 | tuf_1 elongation factor Tu; Duplicate proteins: STM14_4982                                     |
| STM14_2584                 | rfbH CDP-6-deoxy-D-xylo-4-hexulose-3-dehydrase                                                 |

|            |                                                         |
|------------|---------------------------------------------------------|
| STM14_3687 | gcvP glycine dehydrogenase                              |
| STM14_4320 | uspA universal stress protein A                         |
| STM14_4700 | ilvE branched-chain amino acid aminotransferase         |
| STM14_4443 | mtlA mannitol-specific enzyme IIABC component           |
| STM14_5487 | deoC deoxyribose-phosphate aldolase                     |
| STM14_0489 | tsx nucleoside channel                                  |
| STM14_0476 | putative thiol-alkyl hydroperoxide reductase            |
| STM14_0871 | pal peptidoglycan-associated outer membrane lipoprotein |
| STM14_3425 | srlD sorbitol-6-phosphate dehydrogenase                 |
| STM14_4328 | putative L-asparaginase                                 |

| Mouse proteins |                                                                                                                                                |
|----------------|------------------------------------------------------------------------------------------------------------------------------------------------|
| Dataset        | Description                                                                                                                                    |
| gi 149248895   | PREDICTED: similar to Glyceraldehyde-3-phosphate dehydrogenase (GAPDH) isoform 1 [Mus musculus] ref XP_001475565.1                             |
| gi 149251776   | PREDICTED: similar to Nucleophosmin (NPM) (Nucleolar phosphoprotein B23) (Numatrin) (Nucleolar protein NO38) [Mus musculus] ref XP_001476579.1 |
| gi 94378251    | PREDICTED: similar to histone H4 [Mus musculus] ref XP_981474.1                                                                                |
| gi 160333652   | protease, serine, 32 [Mus musculus] ref NP_081496.2                                                                                            |
| gi 6678097     | serpin B6 isoform b [Mus musculus] ref NP_033280.1                                                                                             |
| gi 31982171    | murinoglobulin-1 precursor [Mus musculus] ref NP_032671.2                                                                                      |
| gi 87239967    | deleted in malignant brain tumors 1 protein [Mus musculus] ref NP_031795.2                                                                     |
| gi 160333869   | pancreatic lipase-related protein 2 [Mus musculus] ref NP_035258.2                                                                             |
| gi 6754980     | regenerating islet-derived protein 3-beta precursor [Mus musculus] ref NP_035166.1                                                             |
| gi 226958497   | serum amyloid P-component precursor [Mus musculus] ref NP_035448.2                                                                             |
| gi 6755308     | regenerating islet-derived protein 3-alpha precursor [Mus musculus] ref NP_035389.1                                                            |
| gi 254281348   | chitinase-3-like protein 3 precursor [Mus musculus] ref NP_034022.2                                                                            |
| gi 20330802    | serotransferrin precursor [Mus musculus] ref NP_598738.1                                                                                       |
| gi 33563252    | fibrinogen, alpha polypeptide isoform 2 [Mus musculus] ref NP_034326.1                                                                         |
| gi 147901863   | mepirin A subunit beta precursor [Mus musculus] ref NP_032612.2                                                                                |
| gi 225735649   | sulfated glycoprotein 1 isoform A preproprotein [Mus musculus] ref NP_001139592.1                                                              |
| gi 6681297     | chymotrypsin-like elastase family member 2A precursor [Mus musculus] ref NP_031945.1                                                           |
| gi 11037800    | cell surface A33 antigen precursor [Mus musculus] ref NP_067623.1                                                                              |
| gi 6755310     | regenerating islet-derived protein 3-gamma precursor [Mus musculus] ref NP_035390.1                                                            |
| gi 31981716    | histocompatibility 2, class II antigen A, alpha precursor [Mus musculus] ref NP_034508.2                                                       |
| gi 6677703     | lithostathine-1 precursor [Mus musculus] ref NP_033068.1                                                                                       |
| gi 6677705     | lithostathine-2 precursor [Mus musculus] ref NP_033069.1                                                                                       |
