# Supplementary material for: A Multi-Omic View of Host-Pathogen-Commensal Interplay in Salmonella-Mediated Intestinal Infection
Source: PLOS journal article supplement (doi:10.1371/journal.pone.0067155), 2013-06-26

**A**

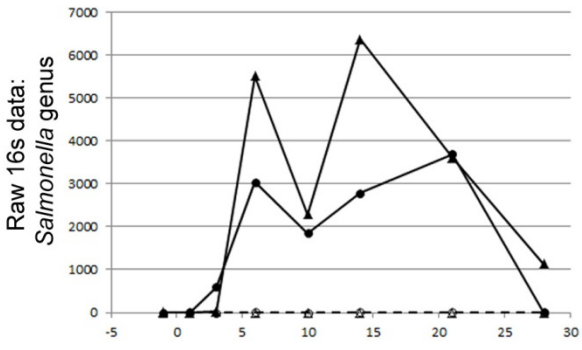

**B**

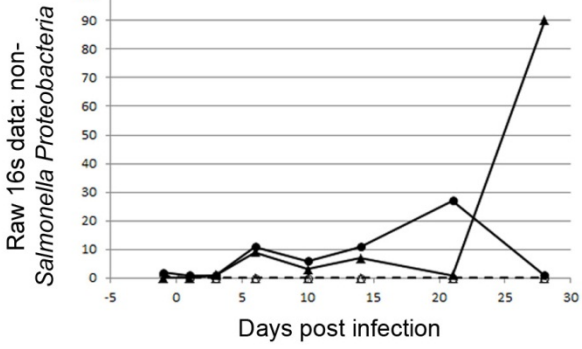

Supplement: S3 (10.1371/journal.pone.0067155.s003) [file journal.pone.0067155.s003]
