# Supplementary material for: A Multi-Omic View of Host-Pathogen-Commensal Interplay in Salmonella-Mediated Intestinal Infection
Source: PLOS journal article supplement (doi:10.1371/journal.pone.0067155), 2013-06-26
Supplement: S9 (10.1371/journal.pone.0067155.s009) [file journal.pone.0067155.s009]

Table S2: Selected mouse proteins identified during infection

| Reference                          | Protein Name                                                  | Protein Function(s) where known                                                                                                           | Citation |
|------------------------------------|---------------------------------------------------------------|-------------------------------------------------------------------------------------------------------------------------------------------|----------|
| <b>Neutrophil-related proteins</b> |                                                               |                                                                                                                                           |          |
| NP_034954.2                        | myeloperoxidase precursor                                     | Enzymatic component of neutrophil azurophilic granules                                                                                    | (7)      |
| NP_079705.2                        | leukocyte elastase inhibitor                                  | Regulator of neutrophil proteases                                                                                                         |          |
| NP_032720.2                        | neutrophilic granule protein (proteinase-3)                   | Antimicrobial                                                                                                                             | (12)     |
| NP_035308.2                        | myeloblastin precursor*                                       | Azurophilic neutrophil granule protein released during activation                                                                         | (11)     |
| NP_081138.2                        | CD177 antigen precursor*                                      | Neutrophil-specific cell surface glycoprotein                                                                                             | (10)     |
| NP_032430.2                        | integrin beta-2 (CD18)                                        | Mediates transendothelial migration of leukocytes during inflammation                                                                     | (10)     |
| <b>Cell surface proteins</b>       |                                                               |                                                                                                                                           |          |
| NP_034508.2                        | histocompatibility 2, class II antigen A, $\alpha$ precursor  | Antigen presentation                                                                                                                      | (6)      |
| NP_996988.2                        | histocompatibility 2, class II antigen A, $\beta$ 1 precursor | Antigen presentation                                                                                                                      | (6)      |
| NP_034204.1                        | dipeptidyl peptidase 4 isoform 1 (CD26)*                      | T-cell activation                                                                                                                         |          |
| NP_067623.1                        | cell surface A33 antigen precursor*                           | Intestinal cell surface antigen of the immunoglobulin family                                                                              | (5)      |
| NP_666122.1                        | tetraspanin 8*                                                | Cell surface protein that complexes with integrins                                                                                        |          |
| <b>Inflammatory molecules</b>      |                                                               |                                                                                                                                           |          |
| NP_035389.1                        | regenerating islet-derived protein 3- $\alpha$ precursor*     |                                                                                                                                           |          |
| NP_035166.1                        | regenerating islet-derived protein 3- $\beta$ precursor       | Antimicrobial                                                                                                                             | (13)     |
| NP_035390.1                        | regenerating islet-derived protein 3- $\gamma$ precursor      | Antimicrobial                                                                                                                             | (1)      |
| NP_033908.2                        | complement C3                                                 | Initiator of the complement cascade                                                                                                       | (9)      |
| NP_033140.1                        | protein S100-A9                                               | Heterodimer = calprotectin; surface glycoprotein reduces bacterial invasion and epithelial cell binding; abundant PMN cytoplasmic protein | (4)      |
| NP_038678.1                        | protein S100-A8                                               |                                                                                                                                           |          |
| NP_033068.1                        | lithostathine-1 precursor*                                    | Bacterial aggregation, pancreatic stone formation                                                                                         | (3)      |
| NP_033069.1                        | lithostathine-2 precursor*                                    |                                                                                                                                           |          |
| NP_031795.2                        | deleted in malignant brain tumors 1 protein*                  | Secreted scavenger receptor, binds bacterial cells, immune modulation                                                                     | (8)      |
| NP_035448.2                        | serum amyloid P-component precursor*                          | Binds LPS, impacts activation of complement (classical pathway)                                                                           | (2)      |

\*Not previously characterized as part of the immune response against *S. Typhimurium*.

1. **Cash, H. L., C. V. Whitham, C. L. Behrendt, and L. V. Hooper.** 2006. Symbiotic bacteria direct expression of an intestinal bactericidal lectin. *Science* **313**:1126-1130.
2. **de Haas, C. J., E. M. van Leeuwen, T. van Bommel, J. Verhoef, K. P. van Kessel, and J. A. van Strijp.** 2000. Serum amyloid P component bound to gram-negative bacteria prevents lipopolysaccharide-mediated classical pathway complement activation. *Infect Immun* **68**:1753-1759.
3. **Jin, C. X., T. Hayakawa, S. B. Ko, H. Ishiguro, and M. Kitagawa.** 2011. Pancreatic stone protein/regenerating protein family in pancreatic and gastrointestinal diseases. *Intern Med* **50**:1507-1516.

Table S2: Selected mouse proteins identified during infection

4. **Johne, B., M. K. Fagerhol, T. Lyberg, H. Prydz, P. Brandtzaeg, C. F. Naess-Andresen, and I. Dale.** 1997. Functional and clinical aspects of the myelomonocyte protein calprotectin. *Mol Pathol* **50**:113-123.
5. **Joosten, C. E., L. S. Cohen, G. Ritter, C. A. Batt, and M. L. Shuler.** 2004. Glycosylation profiles of the human colorectal cancer A33 antigen naturally expressed in the human colorectal cancer cell line SW1222 and expressed as recombinant protein in different insect cell lines. *Biotechnol Prog* **20**:1273-1279.
6. **Kaufmann, S. H., and U. E. Schaible.** 2005. Antigen presentation and recognition in bacterial infections. *Curr Opin Immunol* **17**:79-87.
7. **Klebanoff, S. J.** 2005. Myeloperoxidase: friend and foe. *J Leukoc Biol* **77**:598-625.
8. **Ligtenberg, A. J., E. C. Veerman, A. V. Nieuw Amerongen, and J. Mollenhauer.** 2007. Salivary agglutinin/glycoprotein-340/DMBT1: a single molecule with variable composition and with different functions in infection, inflammation and cancer. *Biol Chem* **388**:1275-1289.
9. **Makela, P. H., M. Hovi, H. Saxen, M. Valtonen, and V. Valtonen.** 1988. Salmonella, complement and mouse macrophages. *Immunol Lett* **19**:217-222.
10. **Muschter, S., T. Berthold, and A. Greinacher.** 2011. Developments in the definition and clinical impact of human neutrophil antigens. *Curr Opin Hematol* **18**:452-460.
11. **Rao, N. V., N. G. Wehner, B. C. Marshall, W. R. Gray, B. H. Gray, and J. R. Hoidal.** 1991. Characterization of proteinase-3 (PR-3), a neutrophil serine proteinase. Structural and functional properties. *J Biol Chem* **266**:9540-9548.
12. **Scocchi, M., B. Skerlavaj, D. Romeo, and R. Gennaro.** 1992. Proteolytic cleavage by neutrophil elastase converts inactive storage proforms to antibacterial bactenecins. *Eur J Biochem* **209**:589-595.
13. **Stelter, C., R. Kappeli, C. Konig, A. Krah, W. D. Hardt, B. Stecher, and D. Bumann.** 2011. Salmonella-induced mucosal lectin RegIIIbeta kills competing gut microbiota. *PLoS One* **6**:e20749.
